# Supplementary material for: A Phase II Exploratory Study to Identify Biomarkers Predictive of Clinical Response to Regorafenib in Patients with Metastatic Colorectal Cancer Who Have Failed First-Line Therapy
Source: MDPI journal article supplement (doi:10.3390/ijms25010043), 2023-12-19
Supplement: s1 [file s1]

<sup>1</sup>Supplementary information

## A Phase II exploratory study to identify biomarkers predictive of clinical response to regorafenib in patients with metastatic colorectal cancer who have failed first-line therapy.

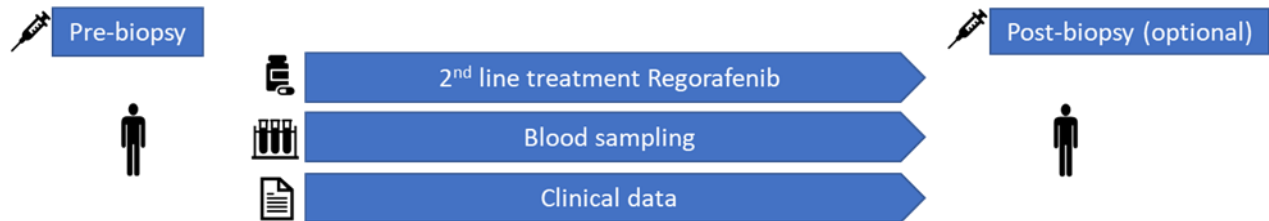

**Figure S1.** Overview of Study Design

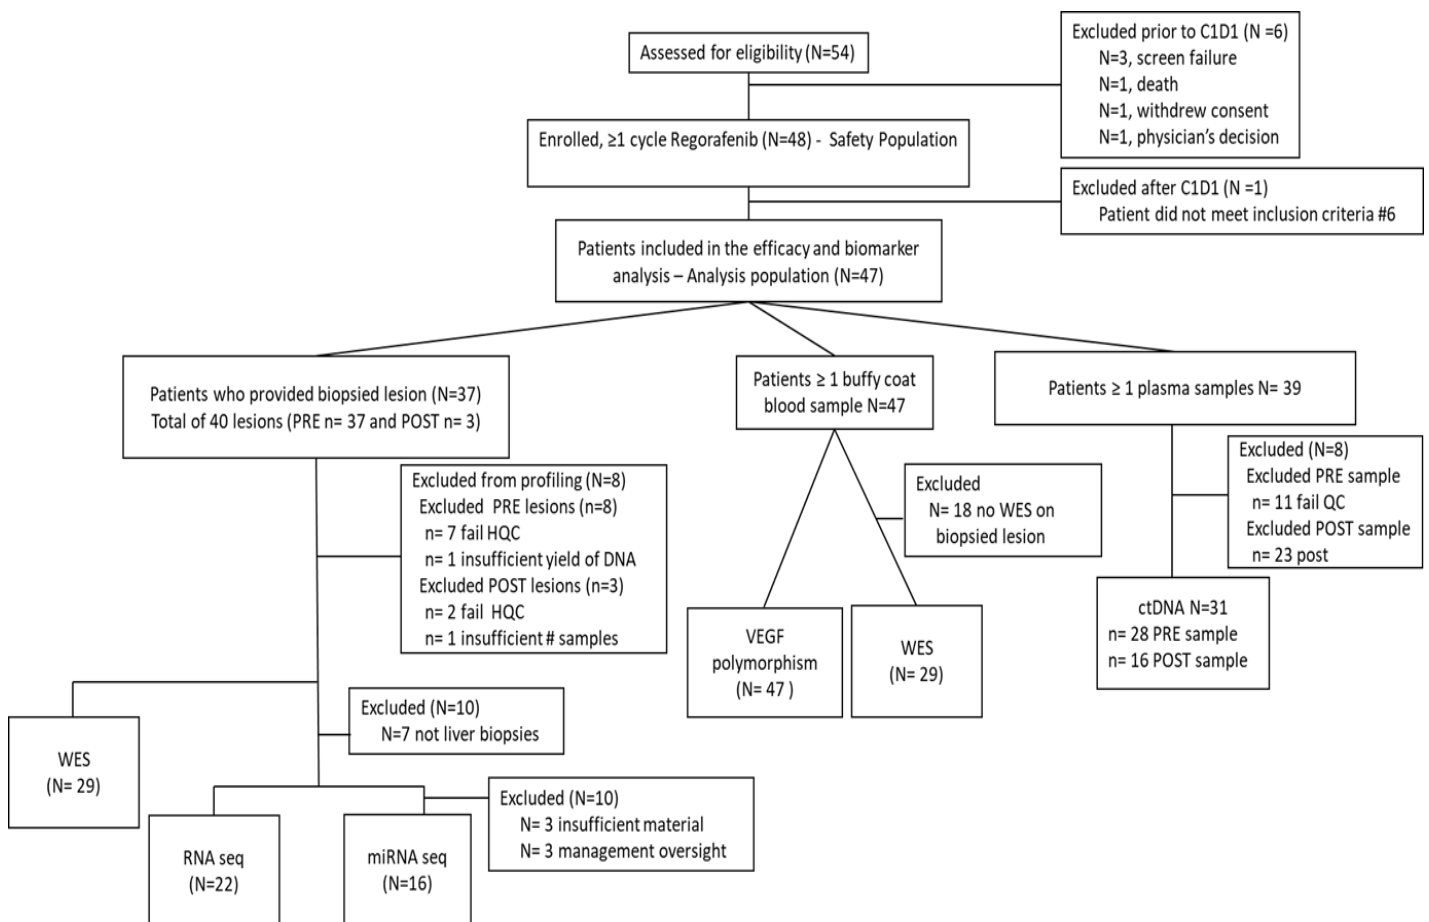

**Figure S2. Consort Diagram of Subject Disposition.** The number of patients is presented using N and the number of lesions is presented using n. C1D1, Cycle 1 Day 1; HQC, Histopathology Quality Control; WES, Whole Exome Sequencing, ctDNA, Circulating tumour DNA; Seq, Sequencing.

### **S1: Objective Response of Biopsied Lesions**

At each radiological evaluation, the site staff was to capture the size of the lesion sampled at the time of the pre-treatment biopsy collection in order to follow its response to treatment. RECIST v. 1.1 guidelines were used to assess the response of the biopsied lesion as follows:

- PR: a lesion with  $\geq 30\%$  decrease in the longest diameter compared to baseline
- SD:
  - a lesion with  $< 30\%$  decrease in the longest diameter compared to baseline, or
  - a lesion with  $< 20\%$  increase in comparison to the smallest diameter, or
  - a lesion with  $\geq 20\%$  and  $< 5$  mm increase in the longest diameter in comparison to the smallest diameter.
- PD: a lesion with  $\geq 20\%$  and  $\geq 5$  mm increase in the longest diameter in comparison to the smallest diameter.

Lesions were subsequently divided, when applicable, into two subcategories intrinsic resistant (IRES) lesions and acquired resistant (ARES) lesions which were defined as follows:

- IRES: a new lesion or a lesion with  $\geq 20\%$  and minimally by  $\geq 5$  mm increase in the longest diameter at the first 8-week evaluation,
- ARES: a lesion with a PR or SD response followed by a PD response. When pre- and post-biopsies were from different liver segments, the response of the lesion sampled was used.

### **S2: Inclusion Criteria**

Patients were to meet these inclusion criteria to be enrolled in this study:

- (1) Signed informed consent obtained before any study-specific procedures. Patients must have been able to understand and be willing to sign a written informed consent.
- (2) Male or female patients  $\geq 18$  years of age.
- (3) Histological documentation of adenocarcinoma of the colon or rectum, with at least one liver metastatic site available for biopsy (other metastatic sites may have been considered but must have been first approved by the Sponsor-Investigator).
- (4) Metastatic disease not suitable for upfront curative-intent surgery.
- (5) Patients must have received one (and no more than one) prior treatment regimen for metastatic CRC (i.e. FOLFOX, FOLFIRI or XELOX, with/without bevacizumab). Patients who had withdrawn from standard first-line treatment due to unacceptable toxicity before progression of disease were to be allowed into the study
- (6) Measurable disease according to RECIST v. 1.1.
- (7) ECOG status of  $\leq 1$ .
- (8) Life expectancy of at least 3 months.
- (9) Women of childbearing potential and men must have agreed to use adequate contraception since signing of the informed consent form until at least 3 months after the last study drug administration. The investigator or a designated associate was requested to advise the patient on how to achieve adequate birth control. Adequate contraception was defined in the study as any medically recommended method (or combination of methods) as per the standard of care.

(10) Adequate bone marrow, liver, and renal function as assessed by the following laboratory requirements conducted within 7 days of starting to study treatment:

- Total bilirubin  $\leq 1.5 \times$  the upper limit of normal (ULN)
- Alanine aminotransferase (ALT) and aspartate aminotransferase (AST)  $\leq 2 \times$  ULN ( $\leq 5 \times$  ULN for patients with liver involvement of their cancer)
- Alkaline phosphatase limit  $\leq 2.5 \times$  ULN ( $\leq 5 \times$  ULN for patients with liver involvement of their cancer)
- Amylase and lipase  $\leq 1.5 \times$  ULN
- Serum creatinine  $\leq 1.5 \times$  ULN
- International normalized ratio (INR) and partial thromboplastin time (PTT)  $\leq 1.5 \times$  ULN.
- Platelet count  $\geq 100 \times 10^9$  /L, hemoglobin  $\geq 90$  g/L, absolute neutrophil count (ANC)  $> 1.5 \times 10^9$  /L.

### **Exclusion Criteria**

Patients were to be excluded from this study if they met any of the following criteria:

- (1) Previous treatment with regorafenib.
- (2) Previous or concurrent cancer that was distinct in primary site or histology from colorectal cancer within 5 years before randomization, EXCEPT for curatively treated cervical cancer in situ, non-melanoma skin cancer and superficial bladder tumours.
- (3) Extended field radiotherapy within 4 weeks or limited field radiotherapy within 2 weeks prior to registration. Patients had to have recovered from all therapy-related toxicities. The site of previous therapy was to have evidence of progressive disease if this was the only site of disease.
- (4) Major surgical procedure or significant traumatic injury within 28 days before start of study treatment (day of first dose).
- (5) Pregnancy or breast-feeding.
- (6) Congestive heart failure  $\geq$  New York Heart Association (NYHA) class 2.
- (7) Unstable angina (angina symptoms at rest), new-onset angina (began within the last 3 months). Myocardial infarction less than 6 months before start of study treatment (day of first dose).
- (8) Cardiac arrhythmias requiring anti-arrhythmic therapy (beta blockers or digoxin were permitted).
- (9) Uncontrolled hypertension (systolic blood pressure  $> 150$  mmHg or diastolic pressure  $> 90$  mmHg despite optimal medical management).
- (10) Pheochromocytoma.
- (11) Pleural effusion or ascites that caused respiratory compromise ( $\geq$  Grade 2 dyspnea per Common Terminology Criteria for Adverse Events [CTCAE] v. 4.0 or higher).
- (12) Arterial or venous thrombotic or embolic events such as cerebrovascular accident (including transient ischemic attacks), deep vein thrombosis or pulmonary embolism within the 3 months before start of study treatment (day of first dose).
- (13) Ongoing uncontrolled infection  $>$  Grade 2 per CTCAE.
- (14) Known history of human immunodeficiency virus (HIV) infection.
- (15) Active hepatitis B or C, or chronic hepatitis B or C requiring antiviral therapy.
- (16) Seizure disorder requiring medication.
- (17) Any history of or currently known brain metastases (patients with stable brain metastases  $\geq 3$  months may be eligible for the study).
- (18) History of organ allograft.
- (19) Evidence or history of severe bleeding diathesis.
- (20) Non-healing wound, ulcer, or bone fracture.

- (21) Renal failure requiring hemodialysis, peritoneal dialysis or baseline GFR < 30 mL/min/1.73m<sup>2</sup> .
- (22) Dehydration ≥ Grade 2, as per CTCAE.
- (23) Substance abuse or medical, psychological, or social conditions that could have interfered with the patient's participation in the study or evaluation of the study results.
- (24) Known hypersensitivity to regorafenib, regorafenib class of drugs, or excipients in the formulation.
- (25) Any illness or medical conditions that were unstable or could have jeopardized the safety of the patient and his or her compliance in the study in the opinion of the investigator.
- (26) Interstitial lung disease with ongoing signs and symptoms at the time of informed consent.
- (27) Persistent proteinuria ≥ Grade 3 per CTCAE (i.e. >3.5 g/24 hours).
- (28) Inability to swallow oral medications.
- (29) Any malabsorption condition.
- (30) Unresolved toxicity ≥ Grade 1, attributed to any prior therapy/procedure, excluding alopecia and oxaliplatin neurotoxicity ≤ Grade 2 (CTCAE).

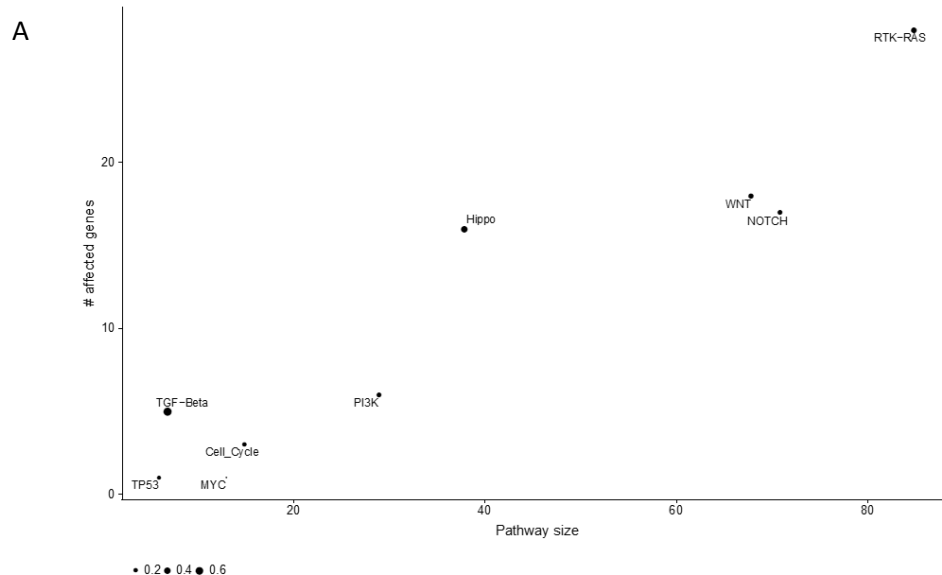

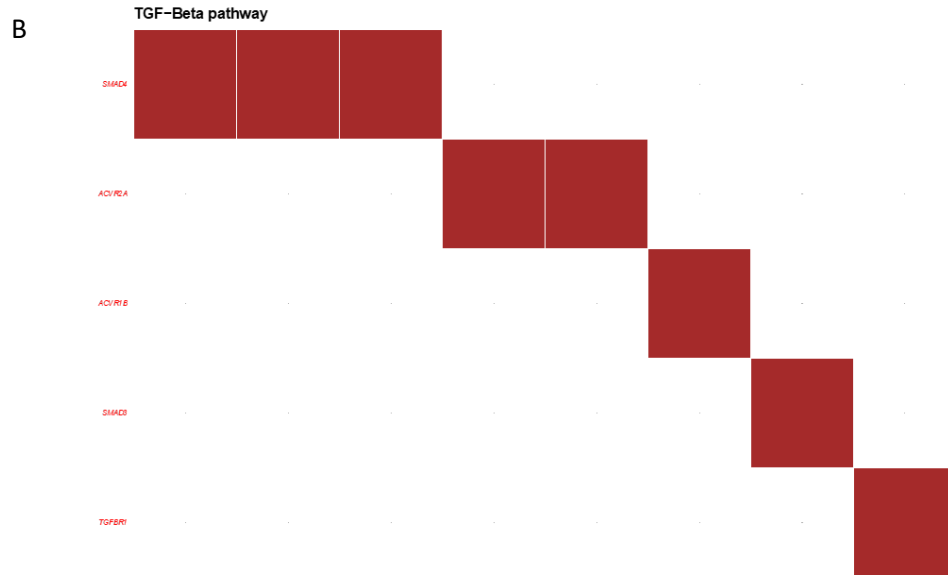

**Figure S3. Visualization of mutations present in metastatic samples of the cohort by oncogenic pathways. A:** The x-axis shows the number of genes in the pathways. The y-axis shows the number of genes altered in the present cohort. The size of the dot represents the proportion of genes mutated in Q-CROC-06 cohort per the total number of genes in the pathway (N=29 ). **B.** Visualization of the TGF- $\beta$  pathways. Each column represents a patient and each row a gene in the TGF- $\beta$  pathway. A red square is present when the gene is mutated in the patient sample.

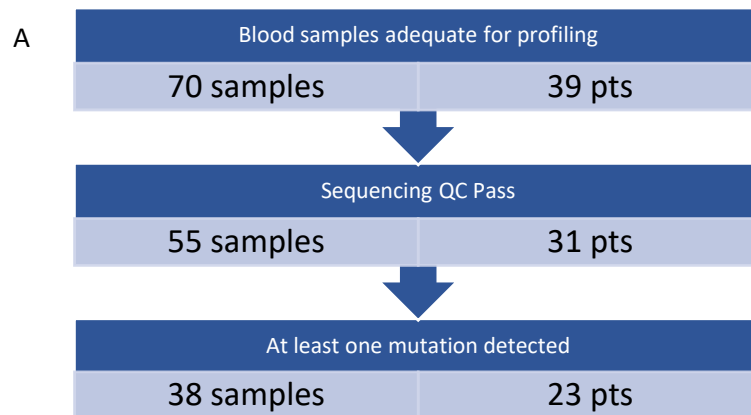

**B**

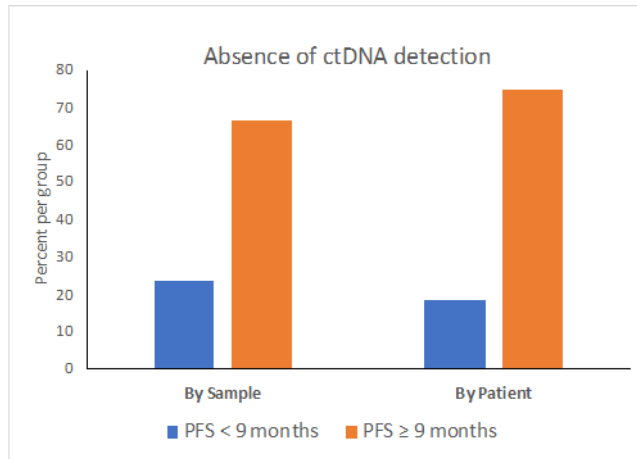

**Figure S4.** Cell-free DNA analysis.

- A. Attrition flowchart for cfDNA profiling assay; B. Proportion of samples and patients with no ctDNA detected within each group defined using a PFS cutoff of 9 months.

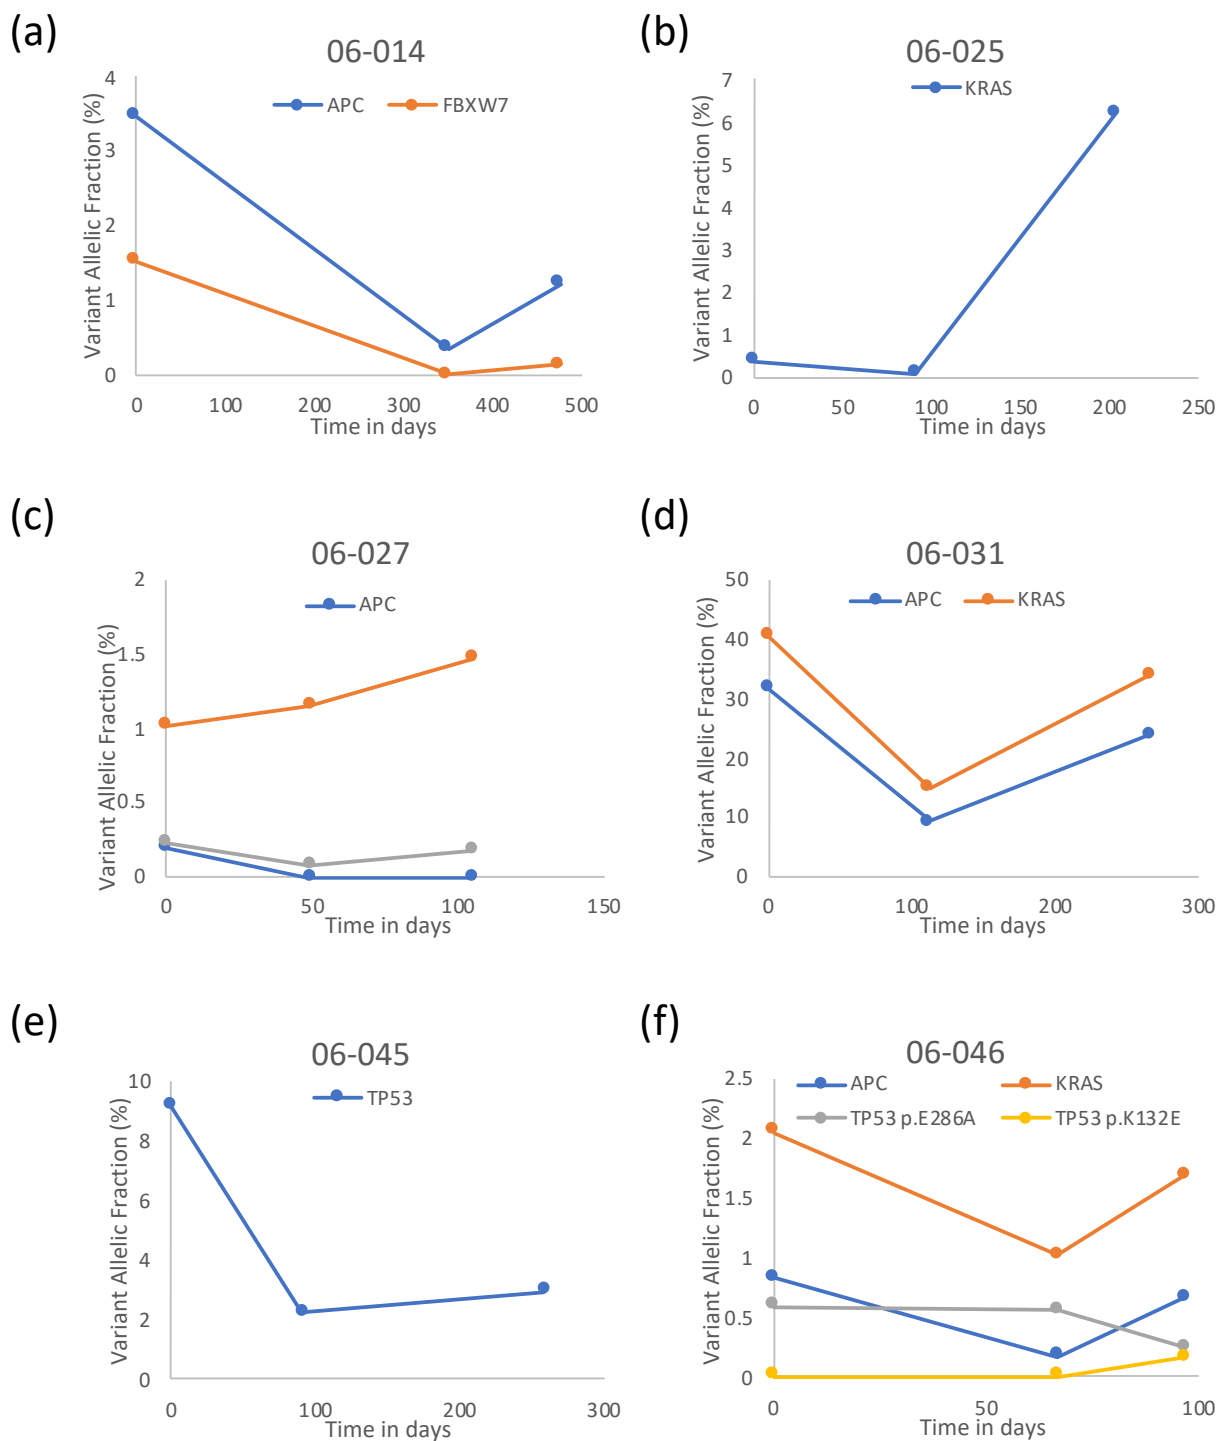

**Figure S5. Variant allelic fraction dynamics during the course of treatment**

a) patient 06-14, b) patient 06-025, c) patient 06-027, d) patient 06-031, e) patient 06-045, and f) patient 06-046. On the x-axis is the time in days and on the y-axis is the VAF. Each line represents a specific mutation detected as

shown in each patient legend. The first point represents time at baseline, the second time at response and the third, time of progression.

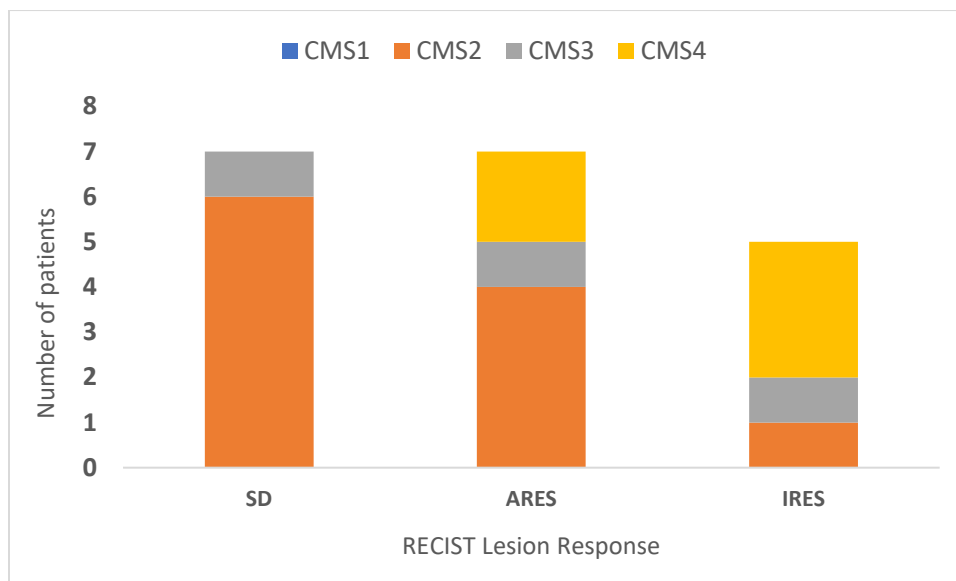

**Figure S6: Distribution of Consensus Molecular Subtypes (CMS) within RECIST lesion Response Groups.**

**Table S1: Reasons for treatment discontinuation**

| Category                                                | Overall    |
|---------------------------------------------------------|------------|
| <b>Dosed patients, N</b>                                | 48         |
| Patients withdrawn due to progression of disease, n (%) | 34 (70.8%) |
| Occurrence of an unacceptable AE/toxicity, n (%)        | 10 (20.8%) |
| Patients withdrawn due to clinical progression, n (%)   | 1 (2.1%)   |
| Patients request (withdrew consent), n (%)              | 1 (2.1%)   |
| Investigator decision, n (%)                            | 1 (2.1%)   |
| Other, n (%)                                            | 1 (2.1%)   |

**Table S2: Summary of biopsied lesion and lesion response assessment**

| LESION ASSESSMENT                           | ANALYSIS POPULATION |       |
|---------------------------------------------|---------------------|-------|
|                                             | N=47                |       |
|                                             | N or n <sup>1</sup> | %     |
| <b># Patients with &gt; 1 biopsy sample</b> | N=47                |       |
| Yes                                         | 37                  | 78.7% |
| No                                          | 10                  | 21.3% |



|                                                     |      |       |
|-----------------------------------------------------|------|-------|
| <b># PRE and POST Biopsied Lesions <sup>2</sup></b> | n=40 |       |
| prior to regorafenib initiation                     | 37   | 92.5% |
| after regorafenib discontinuation <sup>3</sup>      | 3    | 7.5%  |
| <b>PRE Biopsied Lesion Location<sup>2</sup></b>     | n=37 |       |
| Liver                                               | 27   | 73.0% |
| Other                                               | 9    | 24.3% |
| Unknown                                             | 1    | 2.7%  |
| <b>PRE Biopsied Lesion Response <sup>3,4</sup></b>  | n=31 |       |
| SD                                                  | 12   | 38.7% |
| ARES                                                | 11   | 35.5% |
| IRES                                                | 8    | 25.8% |
| N/A                                                 | 6    | N/A   |

<sup>1</sup> N refers to the number of patients and n refers to the number of biopsy samples

<sup>2</sup> Calculated from the total number of biopsied lesions (n=40)

<sup>3</sup> Pre- and post-regorafenib biopsies of the same patient (n=3) are from different lesions. Post regorafenib biopsies responses were IRES, ARES, and SD and were not used for translational analysis

<sup>4</sup> Calculated from the total number of pre-biopsied lesions (n=37)

<sup>5</sup> Calculated from the total number of pre-biopsied lesions with an evaluable response (n=31)

**Table S3.** Summary of Treatment-Emergent Adverse Events by SOC Experienced by ≥10% of patients.

| <b>System Organ Class</b>                                   | <b>Safety Population (N=48)</b> |
|-------------------------------------------------------------|---------------------------------|
| <b>CTCAE Term</b>                                           | <b>n (%)</b>                    |
| <b>Patients with at least one TEAE</b>                      | 48 (100 %)                      |
| <b>Gastrointestinal Disorders</b>                           | 38 (79.2 %)                     |
| <b>Diarrhea</b>                                             | 21 (43.8 %)                     |
| <b>Abdominal pain</b>                                       | 16 (33.3 %)                     |
| <b>Nausea</b>                                               | 10 (20.8 %)                     |
| <b>Vomiting</b>                                             | 10 (20.8 %)                     |
| <b>Mucositis oral</b>                                       | 8 (16.7 %)                      |
| <b>Constipation</b>                                         | 7 (14.6 %)                      |
| <b>Rectal hemorrhage</b>                                    | 6 (12.5 %)                      |
| <b>General disorders and administration site conditions</b> | 36 (75.0 %)                     |
| <b>Fatigue</b>                                              | 26 (54.2 %)                     |
| <b>Fever</b>                                                | 15 (31.3 %)                     |
| <b>Chills</b>                                               | 10 (20.8 %)                     |

| <b>System Organ Class</b>                              | <b>Safety Population (N=48)</b> |
|--------------------------------------------------------|---------------------------------|
| <b>CTCAE Term</b>                                      | <b>n (%)</b>                    |
| <b>Skin and subcutaneous tissue disorders</b>          | 32 (66.7 %)                     |
| Palmar-plantar erythrodysesthesia syndrome             | 19 (39.6 %)                     |
| Rash maculo-papular                                    | 7 (14.6 %)                      |
| Alopecia                                               | 6 (12.5 %)                      |
| Dry skin                                               | 5 (10.4 %)                      |
| Pruritus                                               | 5 (10.4 %)                      |
| Other                                                  | 5 (10.4 %)                      |
| <b>Musculoskeletal and connective tissue disorders</b> | 28 (58.3 %)                     |
| Arthralgia                                             | 11 (22.9 %)                     |
| Back Pain                                              | 9 (18.8 %)                      |
| Pain in extremity                                      | 9 (18.8 %)                      |
| Myalgia                                                | 8 (16.7 %)                      |
| <b>Metabolism and nutrition disorders</b>              | 25 (52.1 %)                     |
| Anorexia                                               | 12 (25.0 %)                     |
| Hypophosphatemia                                       | 10 (20.8 %)                     |
| Dehydration                                            | 5 (10.4 %)                      |
| <b>Respiratory, thoracic and mediastinal disorders</b> | 25 (52.1 %)                     |
| Hoarseness                                             | 12 (25.0 %)                     |
| Dyspnea                                                | 8 (16.7 %)                      |
| Epistaxis                                              | 6 (12.5 %)                      |
| Cough                                                  | 5 (10.4 %)                      |
| <b>Investigations</b>                                  | 24 (50.0 %)                     |
| Blood bilirubin increased                              | 8 (16.7 %)                      |

| System Organ Class<br>CTCAE Term | Safety Population (N=48)<br>n (%) |
|----------------------------------|-----------------------------------|
| ALT increased                    | 6 (12.5 %)                        |
| AST increased                    | 6 (12.5 %)                        |
| Lipase increased                 | 5 (10.4 %)                        |
| Platelet count decreased         | 5 (10.4 %)                        |
| Infections                       | 21 (43.8%)                        |
| Urinary tract infection          | 8 (16.7 %)                        |
| Nervous system disorders         | 21 (43.8 %)                       |
| Headache                         | 10 (20.8 %)                       |
| Paresthesia                      | 7 (14.6 %)                        |
| Peripheral motor neuropathy      | 5 (10.4 %)                        |
| Vascular disorders               | 19 (39.6 %)                       |
| Hypertension                     | 17 (35.4 %)                       |
| Renal and urinary disorders      | 11 (22.9 %)                       |
| Proteinuria                      | 8 (16.7 %)                        |

**Table S4:** Incidence of Treatment-Emergent Adverse Events by Maximum Severity by Patient

| Parameter                                    | Safety Population<br>N = 48<br>n (%) |
|----------------------------------------------|--------------------------------------|
| Patients with at least one TEAE <sup>1</sup> | 47 (97.9 %)                          |
| Grade 1                                      | 2 (4.2%)                             |
| Grade 2                                      | 10 (20.8%)                           |
| Grade 3                                      | 29 (60.4 %)                          |
| Grade 4                                      | 7 (14.6%)                            |
| Grade 5                                      | 0                                    |

<sup>1</sup>Each patient is counted once for the maximum severity experienced (any TEAE), unknown TEAEs were not included.

**Table S5:** Summary of Treatment-Emergent Serious Adverse Event.

| <b>Parameter</b>                                                                                   | <b>Safety Population<br/>N = 48</b> |
|----------------------------------------------------------------------------------------------------|-------------------------------------|
| Serious Adverse Events reported (n)                                                                | 19                                  |
| Treatment-emergent serious adverse events (n)                                                      | 19                                  |
| Patients with at least one biopsy-related serious adverse event (n[%])                             | 0 (0 %)                             |
| Treatment-emergent serious adverse events reported (n)                                             | 19                                  |
| Patients with at least one TESAE (n[%])                                                            | 16 (33.3 %)                         |
| Patients with at least one drug-related TESAE (n[%]) <sup>1</sup>                                  | 6 (12.5 %)                          |
| Patients with at least one TESAE leading to drug withdrawal, dose reduction or interruption (n[%]) | 16 (33.3 %)                         |
| Patients with at least one TESAE leading to dose interruption <sup>1</sup> (n[%])                  | 9 (18.8%)                           |
| Patients with at least one TESAE leading to drug withdrawal <sup>1</sup> (n[%])                    | 8 (16.7%)                           |
| Patients with at least one TESAE leading to dose reduction <sup>1</sup> (n[%])                     | 1 (2.1%)                            |

<sup>1</sup>Patients could have been included in more than one category.

**Table S6:** Distribution of Patients' Time of Death After Treatment Discontinuation (Safety Population N=48)

| <b>Months elapsed since regorafenib's last dose</b> | <b>Patients<sup>1</sup><br/>n (%)</b> |
|-----------------------------------------------------|---------------------------------------|
| < 1 month                                           | 3 (6.3%)                              |
| ≥ 1 and < 3 months                                  | 6 (12.5%)                             |
| ≥ 3 and < 6 months                                  | 5 (10.4%)                             |
| ≥ 6 and < 12 months                                 | 1 (2.1%)                              |
| ≥ 12 months                                         | 7 (14.6%)                             |

<sup>1</sup>For some patients, death was reported independently of study discontinuation.

**Table S7:** Univariate and multivariable analysis using PFS as outcome.

|                                   | N  | UNIVARIATE         |         | MULTIVARIABLE     |        |
|-----------------------------------|----|--------------------|---------|-------------------|--------|
|                                   |    | HR (95% CI)        | P       | HR (95% CI)       | P      |
| <b>Age</b>                        |    |                    |         |                   |        |
| < 65y                             | 21 | 1                  |         |                   |        |
| ≥ 65y                             | 26 | 1.1 (0.58 – 2.2)   | 0.72    |                   |        |
| <b>Sex</b>                        |    |                    |         |                   |        |
| Female                            | 15 | 1                  |         |                   |        |
| Male                              | 32 | 1.2 (0.57 – 2.6)   | 0.6     |                   |        |
| <b>BMI</b>                        |    |                    |         |                   |        |
| < 30                              | 30 | 1                  |         |                   |        |
| ≥ 30                              | 17 | 0.54 (0.27-1.1)    | 0.073   |                   |        |
| <b>ECOG</b>                       |    |                    |         |                   |        |
| 0                                 | 12 | 1                  |         |                   |        |
| 1                                 | 31 | 1.1 (0.54 – 2.4)   | 0.72    |                   |        |
| <b>Primary Resected</b>           |    |                    |         |                   |        |
| No                                | 9  | 1                  |         |                   |        |
| Yes                               | 38 | 0.28 (0.12 – 0.67) | 0.0042* | 0.5 (0.19 – 1.3)  | 0.158  |
| <b>Sidedness</b>                  |    |                    |         |                   |        |
| Left                              | 13 | 1                  |         |                   |        |
| Right                             | 34 | 1.3 (0.48 – 3.5)   | 0.61    |                   |        |
| <b>Number of metastatic Sites</b> |    |                    |         |                   |        |
| < 3                               | 31 | 1                  |         |                   |        |
| 3 +                               | 16 | 1.9 (0.97 – 3.8)   | 0.062   |                   |        |
| <b>Liver Metastases</b>           |    |                    |         |                   |        |
| No                                | 12 | 1                  |         |                   |        |
| Yes                               | 35 | 3.1 (1.2 – 8.1)    | 0.023*  | 4.0 (1.40 – 11.7) | 0.01*  |
| <b>Lung Metastases</b>            |    |                    |         |                   |        |
| No                                | 23 | 1                  |         |                   |        |
| Yes                               | 24 | 1.2 (0.63 – 2.4)   | 0.55    |                   |        |
| <b>Peritoneum Metastases</b>      |    |                    |         |                   |        |
| No                                | 37 | 1                  |         |                   |        |
| Yes                               | 10 | 1 (0.46 – 2.2)     | 0.98    |                   |        |
| <b>Other Metastatic Site</b>      |    |                    |         |                   |        |
| No                                | 24 | 1                  |         |                   |        |
| Yes                               | 23 | 1.2 (0.63 – 2.3)   | 0.58    |                   |        |
| <b>Bevacizumab</b>                |    |                    |         |                   |        |
| No                                | 23 | 1                  |         |                   |        |
| Yes                               | 22 | 2.2 (1.1 – 4.3)    | 0.023*  | 2.8 (1.26 – 6.1)  | 0.011* |

\* P ≤ 0.05

HR: Hazard Ratio

CI: Confidence interval

**Table S8:** Summary of the genotype and univariate analysis performed on 47 patients.

| Gene   | SNP       | Genotype | # Patient | %    | Univariate  | HR (95% CI)     | P    |
|--------|-----------|----------|-----------|------|-------------|-----------------|------|
| VEGFA  | rs25648   | TT       | 2         | 4.1  | CC vs TT+TC | 0.93 (0.47-1.9) | 0.85 |
|        |           | CT       | 15        | 30.6 |             |                 |      |
|        |           | CC       | 30        | 61.2 |             |                 |      |
| VEGFA  | rs833061  | CC       | 10        | 20.4 | TT+TC vs CC | 1.2 (0.54-2.6)  | 0.67 |
|        |           | CT       | 25        | 51.0 |             |                 |      |
|        |           | TT       | 12        | 24.5 |             |                 |      |
| VEGFA  | rs699947  | AA       | 10        | 20.4 | CC vs AA+AC | 0.93 (0.44-2)   | 0.86 |
|        |           | AC       | 25        | 51.0 |             |                 |      |
|        |           | CC       | 12        | 24.5 |             |                 |      |
| VEGFA  | rs2010963 | CC       | 4         | 8.2  | CC vs GG+GC | 1.4 (0.41-4.7)  | 0.59 |
|        |           | CG       | 20        | 40.8 |             |                 |      |
|        |           | GG       | 23        | 46.9 |             |                 |      |
| VEGFC  | rs4604006 | CC       | 32        | 65.3 | TT+TC vs CC | 0.99 (0.48-2.1) | 0.99 |
|        |           | CT       | 15        | 30.6 |             |                 |      |
|        |           | TT       | 0         | 0.0  |             |                 |      |
| FLT1   | rs664393  | CC       | 38        | 77.6 | CC+CT vs TT | 0.51 (0.12-2.2) | 0.36 |
|        |           | CT       | 7         | 14.3 |             |                 |      |
|        |           | TT       | 2         | 4.1  |             |                 |      |
| VEGFR2 | rs2071559 | AA       | 18        | 36.7 | GG+AG vs AA | 0.9 (0.44-1.8)  | 0.76 |
|        |           | AG       | 17        | 34.7 |             |                 |      |
|        |           | GG       | 12        | 24.5 |             |                 |      |
| KDR    | rs2305948 | CC       | 41        | 83.7 | CC vs CT+TT | 1.6 (0.61-4.2)  | 0.34 |
|        |           | CT       | 6         | 12.2 |             |                 |      |
|        |           | TT       | 0         | 0.0  |             |                 |      |

**Table S9.** GISTIC analysis showing region focally gained or lost in 29 CRC metastatic lesions.

Only significant regions with Q-bound (FDR adjusted p-value) value  $\leq 0.05$  are shown. G-score: measure of the frequency of occurrence of the aberration and the magnitude of the copy number change (log ratio intensity) at each location in the aggregate of all samples in the data set.

| Region                       | Extended Region              | Type    | Q-Bound    | G-Score    |
|------------------------------|------------------------------|---------|------------|------------|
| chr12:3,603,686-4,155,279    | chr12:121,792-5,153,110      | CN Gain | 0.00824022 | 8.05155565 |
| chr13:32,402,096-32,750,036  | chr13:25,264,913-98,600,139  | CN Gain | 1.69E-07   | 14.4018502 |
| chr20:25,365,450-25,657,629  | chr20:24,163,644-25,893,207  | CN Gain | 7.26E-05   | 11.0571811 |
| chr20:34,205,363-34,740,875  | chr20:29,963,172-45,811,961  | CN Gain | 9.44E-11   | 17.9885341 |
| chr7:130,526,248-131,233,775 | chr7:127,484,260-142,041,334 | CN Gain | 0.01169375 | 7.82692424 |
| chr7:77,471,344-78,075,687   | chr7:63,518,434-82,578,860   | CN Gain | 0.00527846 | 8.35501357 |
| chr7:27,285,501-27,449,776   | chr7:9,289,724-38,261,159    | CN Gain | 1.09E-04   | 10.8448921 |
| chr8:43,033,260-43,057,692   | chr8:41,753,513-43,665,344   | CN Gain | 3.64E-04   | 10.0897836 |
| chr8:85,861,666-86,351,201   | chr8:79,174,768-103,918,616  | CN Gain | 1.99E-06   | 13.1085476 |
| chr1:57,893,600-58,948,410   | chr1:42,628,447-94,578,484   | CN Loss | 0.00413668 | 8.53380572 |
| chr10:89,728,892-90,122,400  | chr10:89,631,252-93,579,279  | CN Loss | 8.71E-04   | 9.44427241 |
| chr14:20,201,425-20,219,310  | chr14:19,123,663-20,586,298  | CN Loss | 0.00166615 | 9.09233989 |
| chr17:11,701,132-11,900,314  | chr17:2,966,482-18,292,633   | CN Loss | 1.68E-05   | 11.5199467 |
| chr18:13,491,557-13,694,281  | chr18:2,537,503-15,270,970   | CN Loss | 1.00E-04   | 10.5997541 |
| chr18:48,474,120-48,584,469  | chr18:44,336,731-50,686,159  | CN Loss | 4.96E-13   | 20.2771852 |
| chr22:16,346,117-16,449,729  | chr22:16,171,502-16,688,967  | CN Loss | 0.00142717 | 9.17590884 |
| chr4:134,111,761-138,440,204 | chr4:100,851,518-158,257,339 | CN Loss | 0.01710582 | 7.52708145 |
| chr5:69,817,965-70,070,758   | chr5:69,521,493-70,671,993   | CN Loss | 0.01335331 | 7.71814656 |
| chr8:11,987,652-11,990,735   | chr8:0-21,705,632            | CN Loss | 5.45E-08   | 15.1886766 |
| chr9:21,623,432-22,169,612   | chr9:13,945,142-22,370,932   | CN Loss | 0.02920405 | 7.05118589 |

**Table S10:** Copy number variation significantly associated with progression-free survival in 29 CRC metastatic lesions.

Displaying only significant regions with a permuted p-value  $\leq 0.05$ .

| Region                  | Event   | Length | Number of samples with the event | Median PFS (days) with the event | Number of samples without the event | Median PFS (days) without the event | Perm P-Value | Gene Symbols                         | miRNAs |
|-------------------------|---------|--------|----------------------------------|----------------------------------|-------------------------------------|-------------------------------------|--------------|--------------------------------------|--------|
| chr18:34304267-34802552 | CN Loss | 498286 | 23                               | 56                               | 6                                   | 44                                  | 0.0019       | FHOD3, TPGS2, LOC105372069, KIAA1328 |        |
| chr11:48367375-48370611 | CN Loss | 3237   | 3                                | 28                               | 26                                  | 55                                  | 0.006568144  | OR4C45                               |        |

|                          |         |          |      |      |      |       |             |                                                                                                                                                                                                                                                                                                                                                                                                                                                                                                                                                                                                                                                                                                                                                                                                                                                                                                                                                                             |                                                                      |
|--------------------------|---------|----------|------|------|------|-------|-------------|-----------------------------------------------------------------------------------------------------------------------------------------------------------------------------------------------------------------------------------------------------------------------------------------------------------------------------------------------------------------------------------------------------------------------------------------------------------------------------------------------------------------------------------------------------------------------------------------------------------------------------------------------------------------------------------------------------------------------------------------------------------------------------------------------------------------------------------------------------------------------------------------------------------------------------------------------------------------------------|----------------------------------------------------------------------|
| chr1:16890840-16901409   | CN Gain | 10570    | 3    | 25   | 26   | 55    | 0.010946907 | NBPF1                                                                                                                                                                                                                                                                                                                                                                                                                                                                                                                                                                                                                                                                                                                                                                                                                                                                                                                                                                       |                                                                      |
| chr2:240098365-240497905 | CN Loss | 399541   | 3    | 28   | 26   | 55    | 0.013683634 | MGC16025, HDAC4, MIR4269, MIR2467, LOC101928111                                                                                                                                                                                                                                                                                                                                                                                                                                                                                                                                                                                                                                                                                                                                                                                                                                                                                                                             | hsa-mir-4269                                                         |
| chr8:120918570-121473447 | CN Gain | 554879   | 18   | 53   | 11.5 | 137   | 0.0172      | DEPTOR, COL14A1, MRPL13, MTBP                                                                                                                                                                                                                                                                                                                                                                                                                                                                                                                                                                                                                                                                                                                                                                                                                                                                                                                                               |                                                                      |
| chr10:30024628-32802256  | CN Gain | 2777629  | 5    | 28   | 24   | 55    | 0.0207      | SVIL, JCAD, LOC101929279, MTPAP, GOLGA2P6, MIR7162, MAP3K8, LY2L2, SVIL2P, LOC105376480, ZNF438, LOC101929352, ZEB1-AS1, ZEB1, ARHGAP12, KIF5B, EPC1, LOC102031319, LOC101929431, CCDC7                                                                                                                                                                                                                                                                                                                                                                                                                                                                                                                                                                                                                                                                                                                                                                                     |                                                                      |
| chr1:169572294-169890531 | CN Gain | 318238   | 8    | 51   | 21   | 64    | 0.0208      | SELP, SELL, SELE, METTL18, C1orf112, SCYL3, KIFAP3                                                                                                                                                                                                                                                                                                                                                                                                                                                                                                                                                                                                                                                                                                                                                                                                                                                                                                                          |                                                                      |
| chr4:49098865-49244797   | CN Gain | 145933   | 9    | 49   | 20   | 64    | 0.0221      |                                                                                                                                                                                                                                                                                                                                                                                                                                                                                                                                                                                                                                                                                                                                                                                                                                                                                                                                                                             |                                                                      |
| chr1:155911616-156103255 | CN Gain | 191640   | 10   | 51   | 19   | 56    | 0.0229      | RXFP4, MIR6738, ARHGEF2, SSR2, UBQLN4, LAMTOR2, RAB25, MEX3A, LMNA                                                                                                                                                                                                                                                                                                                                                                                                                                                                                                                                                                                                                                                                                                                                                                                                                                                                                                          |                                                                      |
| chr6:139036828-158520157 | CN Loss | 19483330 | 6    | 49   | 23   | 56    | 0.0233      | GVQW2, CCDC28A, ECT2L, REPS1, ABRACL, HECA, TXLNB, CITED2, LINC01625, FILNC1, LOC103352541, LOC100507477, MIR3668, MIR4465, NMBR, GJE1, VTA1, ADGRG6, LOC153910, HIVEP2, LINC01277, AIG1, ADAT2, PEK3, FUCA2, PHACTR2-AS1, PHACTR2, LTV1, ZC2HC1B, PLAGL1, HYMAI, SF3B5, STX11, SNORA98, UTRN, EPM2A, FBXO30, LOC100507557, SHPRH, GRM1, RAB32, LOC101928661, ADGB, KATNB1L1P6, STXBPS-AS1, LUADT1, STXBPS, SAMD5, SASH1, UST, UST-AS1, LOC105378047, TAB2-AS1, TAB2, SUMO4, ZC3H12D, PPIL4, GINM1, RPS18P9, KATNAL1, LATS1, LOC645967, NUP43, PCMT1, LRP11, RAET1E, RAET1E-AS1, RAET1G, LOC105378052, ULBP2, ULBP1, RAET1K, RAET1L, ULBP3, PPP1R14C, IYD, PLEKHG1, MTHFD1L, LOC102723831, AKAP12, ZBTB2, RMND1, ARMT1, CCDC170, ESR1, MIR3163, SYNE1, SYNE1-AS1, MYCT1, VIP, FBXO5, MTRF1L, RGS17, OPRM1, IPCEF1, CNKSR3, SCAF8, MIR1273C, TIAM2, CLDN20, TFB1M, NOX3, LOC105378068, MIR1202, SNORD28B, MIR4466, ARID1B, TMEM242, ZDHHC14, MIR3632, SNX9, SYNI2-IT1, SYNI2 | hsa-mir-1273c, hsa-mir-1202                                          |
| chr6:158733977-159548166 | CN Loss | 814190   | 6    | 49   | 23   | 56    | 0.0233      | SNORA116, TULP4, TMEM181, MIR7161, DYNLT1, SYTL3, MIR3918, EZR, EZR-AS1, OSTCP1, C6orf99, RSPH3, TAGAP                                                                                                                                                                                                                                                                                                                                                                                                                                                                                                                                                                                                                                                                                                                                                                                                                                                                      |                                                                      |
| chr4:49244857-49319646   | CN Gain | 74791    | 3.5  | 36   | 25.5 | 55    | 0.02583618  |                                                                                                                                                                                                                                                                                                                                                                                                                                                                                                                                                                                                                                                                                                                                                                                                                                                                                                                                                                             |                                                                      |
| chr6:51742394-53787700   | CN Gain | 2045309  | 12   | 51   | 17   | 56    | 0.0259      | PKHD1, MIR206, LINCMD1, MIR133B, IL17A, IL17F, MCM3, PAQR8, EFHC1, TRAM2, TRAM2-AS1, LOC730101, TMEM14A, GSTA7P, GSTA2, GSTA1, GSTA5, GSTA3, GSTA4, ICK, FBXO9, GCM1, MIR5685, ELOVL5, RPS16P5, GCLC, LOC101927136, LINC01564, KLHL31, LRRRC1                                                                                                                                                                                                                                                                                                                                                                                                                                                                                                                                                                                                                                                                                                                               | hsa-mir-206, hsa-mir-133b                                            |
| chr1:175329942-178517389 | CN Gain | 3187449  | 7.5  | 50   | 21.5 | 60    | 0.0281      | TNR, LINC01657, SCARNA3, COP1, PAPP2, ASTN1, MIR488, BRINP2, LINC01645, LINC01741, SEC16B, CRYZL2P-SEC16B, CRYZL2P, RASAL2-AS1, RASAL2, TEX35, C1orf220                                                                                                                                                                                                                                                                                                                                                                                                                                                                                                                                                                                                                                                                                                                                                                                                                     | hsa-mir-488                                                          |
| chr1:181051640-182571579 | CN Gain | 1519941  | 7.5  | 50   | 21.5 | 60    | 0.0281      | IER5, LINC01732, LINC01699, CACNA1E, ZNF648, LINC01344, GLUL, TEDDM1, LINC00272, RGS11, RNASEL, RGS16                                                                                                                                                                                                                                                                                                                                                                                                                                                                                                                                                                                                                                                                                                                                                                                                                                                                       |                                                                      |
| chr8:85861666-86839229   | CN Gain | 977566   | 19   | 53   | 10   | 210   | 0.0289      | LRRCC1, LOC102723322, E2F5, C8orf59, CA13, CA1, CA3, CA3-AS1, CA2, REXO1L2P                                                                                                                                                                                                                                                                                                                                                                                                                                                                                                                                                                                                                                                                                                                                                                                                                                                                                                 |                                                                      |
| chr7:100635850-100645140 | CN Gain | 9292     | 17   | 54   | 12   | 109   | 0.0294      | MUC12                                                                                                                                                                                                                                                                                                                                                                                                                                                                                                                                                                                                                                                                                                                                                                                                                                                                                                                                                                       |                                                                      |
| chr8:126136286-135642910 | CN Gain | 9506634  | 20   | 53   | 9.5  | 175.2 | 0.02954     | NSMCE2, TRIB1, LINC00861, LOC101927657, FAM84B, PCAT1, PCAT2, PRNCR1, CASC19, CCAT1, CASC21, CASC8, CCAT2, POU5F1B, CASC11, MYC*, MIR1204, TMEM75, PVT1, MIR1205, MIR1206, MIR1207, MIR1208, LINC00824, LINC00976, LINC00977, MIR3686, CCDC26, GSDMC, FAM49B, MIR5194, ASAP1-IT2, ASAP1, ASAP1-IT1, ADCY8, EFR3A, OC90, HHLA1, KCNQ3, HPYR1, LRRCC6, TMEM71, PHF20L1, TG, MIR784B, PTCSC1, SLA, WISP1, NDRG1, ST3GAL1, LOC105375773, LOC101927798, LOC101927822, ZFAT, ZFAT-AS1                                                                                                                                                                                                                                                                                                                                                                                                                                                                                             | hsa-mir-1204, hsa-mir-1205, hsa-mir-1206, hsa-mir-1207, hsa-mir-1208 |
| chr8:141568561-141889251 | CN Gain | 320693   | 17.3 | 53.7 | 11.7 | 210   | 0.029833333 | AGO2, PTK2                                                                                                                                                                                                                                                                                                                                                                                                                                                                                                                                                                                                                                                                                                                                                                                                                                                                                                                                                                  | hsa-mir-151                                                          |
| chr6:57213464-58609380   | CN Gain | 1395920  | 6.5  | 49   | 22.5 | 56    | 0.030925    | PRIM2, MIR548U, GUSBP4, LINC00680-GUSBP4, LINC00680                                                                                                                                                                                                                                                                                                                                                                                                                                                                                                                                                                                                                                                                                                                                                                                                                                                                                                                         | hsa-mir-548u                                                         |
| chr18:35067671-38973978  | CN Gain | 3906308  | 3    | 28   | 26   | 55    | 0.031472359 | CELF4, MIR4318, MIR924HG, MIR924, MIR5583-2, MIR5583-1, LINC01902, LINC01477                                                                                                                                                                                                                                                                                                                                                                                                                                                                                                                                                                                                                                                                                                                                                                                                                                                                                                | hsa-mir-4318, hsa-mir-924                                            |



|                          |         |         |      |      |      |       |             |                                                                                                                                                                                                                                                                                                                                                                                                                                                                                                   |                                        |
|--------------------------|---------|---------|------|------|------|-------|-------------|---------------------------------------------------------------------------------------------------------------------------------------------------------------------------------------------------------------------------------------------------------------------------------------------------------------------------------------------------------------------------------------------------------------------------------------------------------------------------------------------------|----------------------------------------|
| chr7:101865172-101892455 | CN Gain | 27284   | 15   | 53   | 14   | 109   | 0.033       | CUX1                                                                                                                                                                                                                                                                                                                                                                                                                                                                                              |                                        |
| chr1:69736-232213        | CN Gain | 162478  | 4    | 49   | 25   | 55    | 0.0331      | OR4F5, LOC729737                                                                                                                                                                                                                                                                                                                                                                                                                                                                                  |                                        |
| chr19:11979616-12573085  | CN Gain | 593470  | 4    | 49   | 25   | 55    | 0.0331      | ZNF439, ZNF69, ZNF700, ZNF763, ZNF433-AS1, ZNF433, ZNF878, ZNF844, ZNF788P, ZNF20, ZNF625-ZNF20, ZNF625, ZNF136, LOC100289333, ZNF44, ZNF563, ZNF442, ZNF799, ZNF443, ZNF709                                                                                                                                                                                                                                                                                                                      |                                        |
| chr8:86841900-96166177   | CN Gain | 9324284 | 20   | 53   | 9.43 | 126.6 | 0.034614286 | PSKH2, ATP6V0D2, SLC7A13, WWP1, RMDN1, CPNE3, CNGB3, CNBD1, DCAF4L2, MMP16, LOC101929709, RIPK2, OSGIN2, NBN**, DECR1, CALB1, LINC00534, LINC01030, TMEM64, NECAB1, C8orf88, PIP4P2, OTUD6B-AS1, OTUD6B, LRR69, MIR4661, SLC26A7, RUNX1T1, LOC102724710, FLJ46284, TRIQK, MIR8084, C8orf87, LINC00535, FAM92A, RBM12B, RBM12B-AS1, TMEM67, MIR378D2, PDP1, CDH17, GEM, RAD54B, FSBP, VIRMA, LOC100288748, ESRP1, DPY19L4, INTS8, CCNE2, TP53INP1, NDUFAF6, MIR3150BH, MIR3150B, MIR3150A, PLEKHF2 | hsa-mir-3150                           |
| chr8:11990735-12009128   | CN Loss | 18394   | 19   | 53   | 10   | 115   | 0.0349      | USP17L7, FAM66D, USP17L2                                                                                                                                                                                                                                                                                                                                                                                                                                                                          |                                        |
| chr19:8974148-10112806   | CN Gain | 1138661 | 3.7  | 49   | 25.3 | 55    | 0.035111731 | MUC16, OR1M1, OR7G2, OR7G1, OR7G3, ZNF317, OR7D2, OR7D4, OR7E24, ZNF699, ZNF559, ZNF559-ZNF177, ZNF177, ZNF266, ZNF560, ZNF426, ZNF426-DT, ZNF121, ZNF561, ZNF561-AS1, ZNF562, ZNF812P, ZNF846, LOC100505555, FBXL12, UBL5, PIN1, OLFM2, COL5A3                                                                                                                                                                                                                                                   |                                        |
| chr1:173056437-173154765 | CN Gain | 98329   | 7    | 49   | 22   | 56    | 0.0354      | TNFSF4                                                                                                                                                                                                                                                                                                                                                                                                                                                                                            |                                        |
| chr1:173953664-175126323 | CN Gain | 1172660 | 7    | 49   | 22   | 56    | 0.0354      | RC3H1, LOC102724601, GPR52*, RABGAP1L, LOC101928696, CACYBP, MRPS14, TNN, KIAA0040                                                                                                                                                                                                                                                                                                                                                                                                                |                                        |
| chr1:186054498-186957787 | CN Gain | 903290  | 7    | 49   | 22   | 56    | 0.0354      | HMCN1, PRG4, TPR, ODR4, OCLM, PDC, LOC102724919, PTGS2*, PACERR, PLA2G4A                                                                                                                                                                                                                                                                                                                                                                                                                          |                                        |
| chr19:22319640-24346108  | CN Gain | 2026470 | 3.5  | 49   | 25.5 | 55    | 0.036117597 | ZNF676, ZNF729, ZNF98, LOC101929124, LINC01233, GOLGA2P9, LOC100996349, LINC01785, ZNF492, ZNF99, ZNF723, ZNF728, LINC01859, LINC01858, ZNF730, ZNF724, IPO5P1, ZNF91, LINC01224, ZNF675, ZNF681, RPSAP58, ZNF726, LOC100505851, ZNF254, HAVCR1P1                                                                                                                                                                                                                                                 |                                        |
| chr11:89406870-89777672  | CN Gain | 370803  | 5    | 49   | 24   | 55    | 0.0366      | FOLH1B, TRIM77, TRIM49, TRIM53AP, TRIM51EP, TRIM64B, TRIM49D1, TRIM49D2, TRIM49D2, TRIM49D1, TRIM64, TRIM51EP, TRIM53AP, TRIM49C                                                                                                                                                                                                                                                                                                                                                                  |                                        |
| chr4:49244857-49320199   | CN Loss | 75343   | 3    | 49   | 26   | 55    | 0.037219485 |                                                                                                                                                                                                                                                                                                                                                                                                                                                                                                   |                                        |
| chr8:96289202-103404337  | CN Gain | 7115137 | 20   | 53   | 9.5  | 64    | 0.03865     | C8orf37-AS1, LOC100500773, GDF6, UQCRB, MTERF3, PTDSS1, LOC102724804, SDC2, CPQ, LOC101927066, TSPYL5, SNORD3H, MTDH, LAPTMA4B, MATN2, SNORA72, RPL30, ERICH5, RIDA, POP1, NIPAL2, KCNS2, STK3, OSR2, VPS13B, MIR599, MIR875, COX6C, SNORD77B, RGS22, FBXO43, POLR2K, SPAG1, RNF19A, MIR4471, ANKRD46, SNX31, MIR7705, PABPC1, YWHAZ, FLJ42969, ZNF706, NACA4P, GRHL2, NCALD, LOC104054148, MIR5680, RRM2B, UBR5-AS1, UBR5                                                                        | hsa-mir-599, hsa-mir-875, hsa-mir-1273 |
| chr7:74580831-74954762   | CN Gain | 373933  | 15   | 52   | 14.5 | 82.5  | 0.0421      | NCF1C, GTF2IP4, GTF2IP1, SPDYE10P, SPDYE17, SPDYE11, SPDYE13P, SPDYE14P, SPDYE15P, CASTOR2, PMS2P5, SPDYE8P                                                                                                                                                                                                                                                                                                                                                                                       |                                        |
| chr8:114388948-116424864 | CN Gain | 2035917 | 18   | 54   | 11   | 210   | 0.0438      | CSMD3, TRPS1                                                                                                                                                                                                                                                                                                                                                                                                                                                                                      |                                        |
| chr18:121171-778209      | CN Loss | 657041  | 12.7 | 51.7 | 16.3 | 90    | 0.047933333 | ROCK1P1, USP14, THOC1, COLEC12, LINC01925, CETN1, CLUL1, TYMSOS, TYMS, ENOSF1, YES1                                                                                                                                                                                                                                                                                                                                                                                                               |                                        |
| chr4:49095653-49098814   | CN Loss | 3162    | 5    | 49   | 24   | 55    | 0.048       |                                                                                                                                                                                                                                                                                                                                                                                                                                                                                                   |                                        |

Permuted p-value calculated by permuting the survival time for each sample and comparing the log-rank statistic for the permuted data to the original data.

\*Drug resistance genes, \*\* Clinically actionable gene (based on the DGIdb<sup>21</sup>)

**Table S11.** Distribution of patients per analysis and their associated PFS, lesion and overall objective response.

| Pt ID  | Best Overall Response | PRE_lesion | POST_lesion | PRE_lesion response | POST_lesion response | PRE_Lesion location                       | PFS (months) | PFS-Event Censored | WES | RNAseq | miRNA | VEGF | CTDNA_PRE | CTDNA_POST |
|--------|-----------------------|------------|-------------|---------------------|----------------------|-------------------------------------------|--------------|--------------------|-----|--------|-------|------|-----------|------------|
| 01-001 | SD                    | X          | N/A         | ARES                | N/A                  | Liver, Seg. 8                             | 3.78         | No                 | Y   | Y      | N     | Y    | Y         | Y          |
| 01-002 | PD                    | X          | N/A         | SD                  | N/A                  | Liver, Seg. 4b                            | 1.68         | No                 | Y   | Y      | N     | Y    | Y         | N          |
| 01-003 | PD                    | X          | N/A         | SD                  | N/A                  | Liver, Seg. 2                             | 0.92         | No                 | Y   | Y      | N     | Y    | N         | N          |
| 01-004 | N/A                   | X          | N/A         | N/A                 | N/A                  | Liver, Seg. 1                             | 0.46         | Yes                | Y   | Y      | Y     | Y    | N/A       | N/A        |
| 01-005 | SD                    | X          | N/A         | SD                  | N/A                  | Right Rectus Lesion                       | 2.53         | Yes                | Y   | Y      | N     | Y    | Y         | N          |
| 01-006 | PD                    | X          | N/A         | IRES                | N/A                  | Liver, Seg. 2<br>junction Seg. 3          | 1.84         | No                 | Y   | Y      | N     | Y    | Y         | N          |
| 01-007 | PD                    | X          | N/A         | IRES                | N/A                  | Liver, Seg. 6                             | 1.61         | No                 | Y   | Y      | Y     | Y    | Y         | N          |
| 01-008 | PD                    | X          | N/A         | IRES                | N/A                  | Liver, Seg. 6                             | 1.45         | No                 | Y   | Y      | Y     | Y    | N         | N          |
| 01-009 | SD                    | N/A        | N/A         | N/A                 | N/A                  | N/A                                       | 7.95         | No                 | N/A | N/A    | N/A   | Y    | Y         | Y          |
| 01-010 | PD                    | X          | N/A         | N/A                 | N/A                  | Lymph node                                | 1.61         | No                 | Y   | Y      | Y     | Y    | Y         | N          |
| 01-011 | PD                    | X          | N/A         | IRES                | N/A                  | Liver, Seg. 2/3                           | 1.61         | No                 | N/A | N/A    | N/A   | Y    | Y         | N          |
| 01-012 | SD                    | N/A        | N/A         | N/A                 | N/A                  | N/A                                       | 3.58         | No                 | N/A | N/A    | N/A   | Y    | N         | Y          |
| 01-013 | PR                    | N/A        | N/A         | N/A                 | N/A                  | N/A                                       | 18.33        | No                 | N/A | N/A    | N/A   | Y    | Y         | Y          |
| 01-014 | SD                    | X          | N/A         | ARES                | N/A                  | Liver, Seg. 5                             | 15.64        | No                 | Y   | Y      | N     | Y    | Y         | Y          |
| 01-015 | PD                    | X          | N/A         | IRES                | N/A                  | Liver, Seg. 4b                            | 1.74         | No                 | N/A | N/A    | N/A   | Y    | N/A       | N/A        |
| 01-016 | SD                    | X          | N/A         | ARES                | N/A                  | Liver, Seg. 7                             | 6.9          | No                 | Y   | Y      | N     | Y    | Y         | Y          |
| 16-017 | PD                    | X          | N/A         | SD                  | N/A                  | Liver, Seg. 3                             | 1.74         | No                 | N/A | N/A    | N/A   | Y    | N         | N          |
| 15-018 | N/A                   | X          | N/A         | N/A                 | N/A                  | Left upper<br>quadrant<br>peritoneal mass | 0.33         | Yes                | Y   | Y      | Y     | Y    | N/A       | N/A        |

| Pt ID  | Best Overall Response | PRE_lesion | POST_lesion | PRE_lesion response | POST_lesion response | PRE_Lesion location | PFS (months) | PFS-Event Censored | WES | RNAseq | miRNA | VEGF | CTDNA_PRE | CTDNA_POST |
|--------|-----------------------|------------|-------------|---------------------|----------------------|---------------------|--------------|--------------------|-----|--------|-------|------|-----------|------------|
| 15-020 | PD                    | X          | N/A         | IRES                | N/A                  | Liver, right lobe   | 0.52         | Yes                | Y   | Y      | Y     | Y    | N/A       | N/A        |
| 01-022 | PD                    | X          | N/A         | SD                  | N/A                  | Liver, Seg. 6/7     | 1.81         | No                 | Y   | Y      | Y     | Y    | N         | N          |
| 01-023 | N/A                   | X          | N/A         | N/A                 | N/A                  | Liver, Seg. 3       | 0.53         | Yes                | Y   | Y      | Y     | Y    | N/A       | N/A        |
| 06-024 | PD                    | X          | N/A         | SD                  | N/A                  | Abdominal wall      | 1.81         | No                 | Y   | Y      | Y     | Y    | N         | N          |
| 06-025 | SD                    | X          | N/A         | ARES                | N/A                  | Liver, Seg. 7/8     | 6.9          | No                 | N/A | N/A    | N/A   | Y    | Y         | Y          |
| 01-026 | SD                    | N/A        | N/A         | N/A                 | N/A                  | Liver, Seg. 5       | 9            | Yes                | N/A | N/A    | N/A   | Y    | Y         | N          |
| 01-027 | SD                    | X          | N/A         | ARES                | N/A                  | Liver, Seg. 6/7     | 3.45         | No                 | N/A | N/A    | N/A   | Y    | Y         | Y          |
| 06-028 | SD                    | N/A        | N/A         | N/A                 | N/A                  | N/A                 | 0.49         | Yes                | N/A | N/A    | N/A   | Y    | N/A       | N/A        |
| 01-030 | SD                    | X          | N/A         | SD                  | N/A                  | Left lung           | 7.79         | No                 | Y   | Y      | N     | Y    | N         | Y          |
| 01-031 | PR                    | X          | N/A         | ARES                | N/A                  | Liver, Seg. 2       | 7.29         | No                 | Y   | Y      | Y     | Y    | Y         | Y          |
| 06-032 | PD                    | N/A        | N/A         | N/A                 | N/A                  | N/A                 | 1.61         | No                 | N/A | N/A    | N/A   | Y    | Y         | N          |
| 01-033 | PD                    | X          | N/A         | IRES                | N/A                  | Abdominal wall      | 0.92         | No                 | Y   | Y      | N     | Y    | Y         | N          |
| 01-034 | PD                    | N/A        | N/A         | N/A                 | N/A                  | N/A                 | 1.81         | No                 | N/A | N/A    | N/A   | Y    | Y         | N          |
| 01-035 | N/A                   | N/A        | N/A         | N/A                 | N/A                  | N/A                 | 0.36         | Yes                | N/A | N/A    | N/A   | Y    | N/A       | N/A        |
| 01-037 | SD                    | N/A        | N/A         | N/A                 | N/A                  | N/A                 | 1.87         | No                 | N/A | N/A    | N/A   | Y    | Y         | N          |
| 01-038 | PD                    | X          | N/A         | N/A                 | N/A                  | Unknown             | 1.81         | No                 | Y   | Y      | N     | Y    | Y         | N          |
| 01-039 | PD                    | N/A        | N/A         | N/A                 | N/A                  | N/A                 | 1.71         | No                 | N/A | N/A    | N/A   | Y    | Y         | Y          |
| 01-040 | PD                    | X          | N/A         | IRES                | N/A                  | Liver, Seg. 7/8     | 1.61         | No                 | Y   | Y      | Y     | Y    | N         | N          |
| 06-041 | PD                    | X          | X           | ARES                | IRES                 | Liver, Seg. 5       | 2.1          | No                 | Y   | Y      | Y     | Y    | Y         | N          |
| 01-042 | N/A                   | X          | N/A         | N/A                 | N/A                  | Liver, Seg. 8       | 0.13         | No                 | Y   | Y      | Y     | Y    | N/A       | N/A        |
| 01-045 | SD                    | X          | X           | ARES                | ARES                 | Transgluteal        | 8.08         | No                 | N/A | N/A    | N/A   | Y    | Y         | Y          |
| 06-046 | SD                    | X          | N/A         | ARES                | N/A                  | Liver, Seg. 8       | 3.52         | No                 | Y   | Y      | Y     | Y    | Y         | Y          |

| Pt ID  | Best Overall Response | PRE_lesion | POST_lesion | PRE_lesion response | POST_lesion response | PRE_Lesion location                                             | PFS (months) | PFS-Event Censored | WES | RNAseq | miRNA | VEGF | CTDNA_PRE | CTDNA_POST |
|--------|-----------------------|------------|-------------|---------------------|----------------------|-----------------------------------------------------------------|--------------|--------------------|-----|--------|-------|------|-----------|------------|
| 06-047 | PD                    | X          | X           | ARES                | SD                   | Liver, Seg. 4a/2                                                | 1.77         | No                 | Y   | Y      | Y     | Y    | N         | N          |
| 06-048 | PD                    | X          | N/A         | SD                  | N/A                  | Liver, Seg. 8                                                   | 0.82         | No                 | Y   | Y      | Y     | Y    | Y         | N          |
| 18-049 | PR                    | X          | N/A         | ARES                | N/A                  | Omentum                                                         | 20.73        | No                 | N/A | N/A    | N/A   | Y    | Y         | Y          |
| 18-050 | PD                    | X          | N/A         | SD                  | N/A                  | Liver, Seg. 5                                                   | 1.74         | No                 | Y   | Y      | Y     | Y    | N         | N          |
| 18-051 | SD                    | X          | N/A         | SD                  | N/A                  | Liver, Seg. 5                                                   | 3.58         | No                 | Y   | Y      | Y     | Y    | Y         | Y          |
| 06-052 | SD                    | X          | N/A         | SD                  | N/A                  | Peritoneal carcinomatosis. Nodules along superficial linea alba | 7.33         | No                 | N/A | N/A    | N/A   | Y    | N         | Y          |
| 06-053 | SD                    | X          | N/A         | SD                  | N/A                  | Liver, Seg. 6/7                                                 | 1.64         | Yes                | Y   | Y      | Y     | Y    | Y         | N          |

X: Biopsy collected

PR: Partial response

SD: Progression of disease

ARES: Acquired resistance lesion

IRES: Intrinsic resistance lesion

Y: Tes, profiled and passed sequencing QC

N: No, profiled and did not pass sequencing QC

NA: Not available, sample not profiled or collected

 Liver samples used for the RNAseq or miRNA analysis

**Table S12:** Significant differential expression of genes between each RECIST response group comparison

| GROUP COMPARISON             | # OF SIGNIFICANT GENES |
|------------------------------|------------------------|
| SD (N=7) VS ARES (N=7)       | 42                     |
| SD (N=7) VS IRES (N=5)       | 76                     |
| ARES (N=7) VS IRES (N=5)     | 197                    |
| SD+ARES (N=14) VS IRES (N=5) | 195                    |

**Table S13:** List of genes differentially expressed

| SD vs IRES |        |          | IRES vs ARES |        |          | SD+ARES vs IRES |        |          |
|------------|--------|----------|--------------|--------|----------|-----------------|--------|----------|
| Genes      | log2FC | FDR      | Genes        | log2FC | FDR      | Genes           | log2FC | FDR      |
| DKK1       | -8.06  | 4.15E-15 | MAGEC1       | 25.24  | 6.12E-28 | PEG10           | -6.85  | 7.44E-11 |
| KRT6A      | -9.82  | 1.53E-10 | MAGEC2       | 27.58  | 6.12E-28 | DKK1            | -6.21  | 3.65E-08 |
| PEG10      | -6.81  | 3.03E-08 | MAGEA6       | 14.77  | 1.51E-14 | TUBB2B          | -5.61  | 3.49E-07 |
| CPLX2      | -6.76  | 5.21E-06 | MAGEA2       | 10.67  | 1.08E-08 | DYNC1I1         | -3.70  | 4.52E-07 |
| TUBB2B     | -5.32  | 7.22E-05 | PEG10        | 6.90   | 1.94E-08 | LYPD3           | -4.44  | 4.52E-07 |
| DYNC1I1    | -3.43  | 1.88E-04 | CSAG1        | 12.97  | 7.72E-08 | KRT6A           | -7.73  | 4.97E-07 |
| DIRAS2     | -5.66  | 1.88E-04 | MAGEA3       | 11.94  | 8.59E-08 | S100A3          | -5.45  | 1.45E-06 |
| SLITRK6    | -6.72  | 1.88E-04 | S100A3       | 6.26   | 5.16E-07 | SCG2            | -4.47  | 2.22E-06 |
| KRT16      | -6.62  | 1.88E-04 | DYNC1I1      | 4.09   | 8.46E-07 | CPLX2           | -6.09  | 2.24E-06 |
| LYPD3      | -4.16  | 1.89E-04 | DKK1         | 5.41   | 1.38E-06 | DIRAS2          | -5.45  | 1.09E-05 |
| S100A3     | -5.03  | 2.63E-04 | TUBB2B       | 5.96   | 1.49E-06 | CALML5          | -11.25 | 1.32E-05 |
| SIX4       | -3.96  | 2.80E-04 | SCG2         | 5.00   | 4.44E-06 | ASXL3           | -4.87  | 1.96E-05 |
| PLA2G4A    | -3.21  | 3.01E-04 | LYPD3        | 4.71   | 4.46E-06 | CNTN1           | -6.55  | 3.44E-05 |
| CDR2L      | -2.04  | 4.02E-04 | FGF3         | 10.34  | 1.21E-05 | NPTX1           | -5.19  | 3.44E-05 |
| ADRA2C     | -4.93  | 5.16E-04 | SLC9A4       | 7.32   | 1.89E-05 | TDRD1           | -6.51  | 4.00E-05 |
| SCG2       | -4.09  | 7.09E-04 | ASXL3        | 5.46   | 1.89E-05 | SLC1A5          | -1.86  | 4.00E-05 |
| TUBB2A     | -3.36  | 9.57E-04 | KRT6A        | 6.97   | 4.47E-05 | TUBB2A          | -3.33  | 5.14E-05 |
| CALML5     | -10.63 | 9.57E-04 | IGFBPL1      | 5.55   | 4.80E-05 | RIMKLA          | -2.71  | 7.03E-05 |
| SLC1A5     | -1.85  | 9.57E-04 | RTKN2        | 2.29   | 4.92E-05 | TBX3            | -1.89  | 9.30E-05 |
| TBX3       | -1.94  | 1.01E-03 | TDRD1        | 7.30   | 4.92E-05 | ADRB1           | -4.84  | 2.08E-04 |
| DEFA5      | -8.08  | 1.35E-03 | CALML5       | 12.32  | 8.09E-05 | KRT5            | -6.35  | 2.26E-04 |
| PRSS56     | -8.77  | 1.66E-03 | IGSF1        | 4.73   | 1.17E-04 | BMP5            | -4.49  | 2.80E-04 |
| FGF19      | -6.09  | 1.74E-03 | ANKRD34B     | 8.35   | 2.08E-04 | SIX4            | -3.49  | 2.80E-04 |
| ASXL3      | -4.45  | 1.74E-03 | CHGA         | 8.29   | 2.08E-04 | IFITM1          | 2.61   | 2.98E-04 |
| RIMKLA     | -2.63  | 1.99E-03 | FAM46B       | 4.02   | 3.76E-04 | CDR2L           | -1.82  | 3.56E-04 |
| B3GALT2    | -4.48  | 2.28E-03 | CPLX2        | 5.59   | 3.76E-04 | SLC9A4          | -5.77  | 4.09E-04 |

|          |       |          |             |       |          |         |       |          |
|----------|-------|----------|-------------|-------|----------|---------|-------|----------|
| TDRD1    | -6.04 | 2.28E-03 | MLLT11      | 3.10  | 5.34E-04 | ECEL1   | -5.90 | 5.52E-04 |
| INHBB    | -3.97 | 2.56E-03 | DIRAS2      | 5.24  | 5.50E-04 | PCDH18  | -3.66 | 5.52E-04 |
| KRT5     | -6.39 | 2.63E-03 | RIMKLA      | 2.79  | 6.26E-04 | FGF3    | -7.65 | 5.52E-04 |
| AKR1B10  | -4.75 | 2.81E-03 | COL11A2     | 4.95  | 6.26E-04 | MT4     | -7.14 | 5.52E-04 |
| TGFB2    | -4.12 | 3.01E-03 | ADAMTS20    | 8.61  | 6.26E-04 | SRRM3   | -3.95 | 6.42E-04 |
| ADRB1    | -4.77 | 3.29E-03 | SOX3        | 10.63 | 7.67E-04 | CDX2    | 2.44  | 6.42E-04 |
| IL17RD   | -4.02 | 3.68E-03 | IFITM1      | -2.88 | 7.67E-04 | VGLL3   | -3.36 | 7.51E-04 |
| MSX1     | -3.98 | 3.89E-03 | SLC1A5      | 1.88  | 7.67E-04 | NOTUM   | -4.98 | 7.66E-04 |
| PIAS3    | -2.21 | 7.46E-03 | ECEL1       | 6.64  | 7.89E-04 | VSTM2L  | -4.14 | 7.66E-04 |
| VGLL3    | -3.37 | 7.46E-03 | PCDH20      | -3.68 | 7.95E-04 | KRT16   | -5.39 | 1.14E-03 |
| NOTUM    | -4.97 | 8.68E-03 | NEB         | 3.99  | 8.23E-04 | VSIG8   | -4.55 | 1.21E-03 |
| IGFBP3   | -2.00 | 9.07E-03 | TUBB2A      | 3.31  | 1.01E-03 | CLDN5   | -3.47 | 1.30E-03 |
| PCDH18   | -3.60 | 9.56E-03 | PRDX5       | -2.21 | 1.04E-03 | TGFB2   | -3.78 | 1.38E-03 |
| DBNDD1   | -1.56 | 1.09E-02 | REXO1L1     | 10.79 | 1.26E-03 | LYPD8   | 6.65  | 1.38E-03 |
| TRIM62   | -2.41 | 1.11E-02 | LGSN        | 5.31  | 1.56E-03 | FAM46B  | -3.33 | 1.55E-03 |
| SLC9A4   | -5.14 | 1.15E-02 | NEUROD1     | 6.39  | 1.63E-03 | MLLT11  | -2.62 | 1.63E-03 |
| FGF3     | -6.93 | 1.15E-02 | ADRB1       | 4.92  | 1.72E-03 | SGCE    | -2.51 | 1.77E-03 |
| HIST2H3D | -1.94 | 1.20E-02 | ZNF8        | 1.17  | 1.72E-03 | CT45A5  | -7.94 | 1.80E-03 |
| PROM2    | -2.75 | 1.20E-02 | TBX3        | 1.83  | 2.29E-03 | RAC3    | -2.21 | 1.90E-03 |
| TMEM158  | -4.20 | 1.31E-02 | SOX21       | 7.62  | 2.30E-03 | GPR155  | -3.17 | 1.97E-03 |
| ECEL1    | -5.48 | 1.32E-02 | RASL11B     | 4.01  | 3.04E-03 | RELL1   | -2.08 | 1.97E-03 |
| GADD45A  | -2.03 | 1.64E-02 | KRT5        | 6.32  | 3.04E-03 | BAMBI   | -3.60 | 1.97E-03 |
| GPR155   | -3.12 | 1.64E-02 | VSIG8       | 4.92  | 3.19E-03 | PIGR    | 5.01  | 2.03E-03 |
| FGFRL1   | -2.13 | 1.64E-02 | KCNK2       | 7.05  | 3.42E-03 | TMEM158 | -4.09 | 2.37E-03 |
| RELL1    | -2.06 | 1.64E-02 | COMMD3-BMI1 | 1.09  | 3.42E-03 | PLA2G4A | -2.59 | 2.44E-03 |
| FSCN1    | -2.89 | 1.64E-02 | GPR108      | -0.96 | 3.42E-03 | ALDH3B2 | -3.90 | 2.44E-03 |
| DUSP4    | -2.59 | 1.64E-02 | SCN5A       | 5.46  | 3.62E-03 | ARTN    | -2.78 | 2.56E-03 |
| BAMBI    | -3.56 | 1.64E-02 | ZNF716      | 8.65  | 3.66E-03 | PIAS3   | -2.03 | 2.66E-03 |

|          |       |          |          |       |          |          |       |          |
|----------|-------|----------|----------|-------|----------|----------|-------|----------|
| VSIG8    | -4.31 | 1.68E-02 | CDX2     | -2.51 | 4.70E-03 | SLC39A2  | 5.00  | 2.66E-03 |
| OSBPL6   | -3.03 | 1.68E-02 | ARTN     | 3.05  | 4.83E-03 | ASPSR1   | -2.24 | 2.66E-03 |
| SGCE     | -2.47 | 1.68E-02 | HHIPL2   | 3.43  | 5.12E-03 | INHBB    | -3.41 | 2.78E-03 |
| ASPSR1   | -2.26 | 1.68E-02 | SLC4A3   | 3.94  | 5.12E-03 | C6orf222 | 2.91  | 2.81E-03 |
| TLL7     | -3.30 | 1.82E-02 | PCDH18   | 3.73  | 5.12E-03 | FSCN1    | -2.81 | 3.19E-03 |
| ID3      | -2.44 | 2.06E-02 | C1orf54  | 1.77  | 5.12E-03 | ZIC1     | -5.22 | 3.31E-03 |
| RAC3     | -2.12 | 2.31E-02 | SLC38A11 | 4.89  | 5.26E-03 | GJB6     | -4.81 | 3.41E-03 |
| SMAD6    | -1.56 | 2.43E-02 | PTPRZ1   | 6.57  | 5.35E-03 | APCDD1   | -3.73 | 3.51E-03 |
| SERPINI1 | -3.28 | 2.44E-02 | PCDH2    | 4.02  | 5.35E-03 | TRIM62   | -2.24 | 3.55E-03 |
| GNAI1    | -3.11 | 2.44E-02 | CASP5    | -3.12 | 5.35E-03 | AKR1B10  | -4.07 | 3.56E-03 |
| AGPAT9   | -3.27 | 2.51E-02 | CRB3     | -1.03 | 5.35E-03 | PRDX5    | 1.86  | 3.75E-03 |
| RASL11B  | -3.36 | 2.68E-02 | COL4A6   | 7.66  | 6.23E-03 | CYP24A1  | -5.03 | 4.22E-03 |
| APCDD1   | -3.54 | 3.47E-02 | ARHGEF18 | -1.05 | 6.58E-03 | CASP5    | 2.81  | 4.32E-03 |
| FAM46B   | -2.91 | 3.63E-02 | VGLL3    | 3.35  | 6.88E-03 | C1orf54  | -1.58 | 4.39E-03 |
| PRAME    | -3.91 | 3.63E-02 | CTPS1    | 1.31  | 7.18E-03 | B3GNT3   | 1.76  | 4.46E-03 |
| FAHD2B   | -1.81 | 3.78E-02 | DLX5     | 7.90  | 7.18E-03 | OSBPL6   | -2.88 | 4.60E-03 |
| MLLT11   | -2.27 | 3.83E-02 | RAC3     | 2.29  | 7.32E-03 | FAHD2B   | -1.84 | 4.72E-03 |
| ARTN     | -2.55 | 4.25E-02 | ZNF300   | 3.24  | 7.47E-03 | PRAME    | -3.98 | 4.72E-03 |
| TMEM163  | -2.82 | 4.25E-02 | MRAP2    | -3.75 | 7.80E-03 | FIGN     | -2.69 | 4.80E-03 |
| CEP72    | -2.48 | 4.61E-02 | SIX4     | 3.15  | 7.80E-03 | GPD1L    | 1.29  | 4.91E-03 |
| GSTA1    | -3.75 | 4.61E-02 | NOTUM    | 4.99  | 8.02E-03 | SLC4A3   | -3.47 | 5.23E-03 |
| TNFRSF19 | -3.17 | 4.74E-02 | MOBP     | 5.03  | 8.66E-03 | PCDH20   | 3.13  | 5.30E-03 |
|          |       |          | SGCE     | 2.57  | 8.66E-03 | FABP3    | 3.11  | 5.35E-03 |
|          |       |          | NXPE4    | -5.51 | 8.66E-03 | B3GALT2  | -3.69 | 5.35E-03 |
|          |       |          | CDR2L    | 1.63  | 8.66E-03 | ADAMTS14 | -3.35 | 5.40E-03 |
|          |       |          | SULT1E1  | 5.54  | 9.04E-03 | CTPS1    | -1.16 | 5.45E-03 |
|          |       |          | OR13H1   | 4.90  | 9.64E-03 | ADRA2C   | -3.81 | 5.65E-03 |
|          |       |          | APCDD1   | 4.00  | 9.64E-03 | HIST2H3D | -1.75 | 6.37E-03 |



|  |  |  |           |       |          |           |       |          |
|--|--|--|-----------|-------|----------|-----------|-------|----------|
|  |  |  | GPR155    | 3.24  | 1.05E-02 | DBNDD1    | -1.39 | 6.37E-03 |
|  |  |  | S100A7    | 7.00  | 1.06E-02 | RASL11B   | -3.65 | 6.75E-03 |
|  |  |  | SERPINB13 | 8.68  | 1.06E-02 | LYZL2     | -4.14 | 7.02E-03 |
|  |  |  | BEST3     | 4.78  | 1.09E-02 | IGFBPL1   | -3.91 | 7.09E-03 |
|  |  |  | C6orf222  | -3.05 | 1.15E-02 | POU3F2    | -5.83 | 7.51E-03 |
|  |  |  | BAMBI     | 3.64  | 1.22E-02 | LNP1      | -1.29 | 8.81E-03 |
|  |  |  | RELL1     | 2.10  | 1.22E-02 | DAZ4      | -7.74 | 8.93E-03 |
|  |  |  | SLC39A2   | -5.12 | 1.24E-02 | TMEM163   | -2.77 | 9.53E-03 |
|  |  |  | TTL       | 1.36  | 1.24E-02 | AGPAT9    | -3.05 | 9.53E-03 |
|  |  |  | ADAMTS14  | 3.61  | 1.25E-02 | NXPE4     | 4.80  | 9.61E-03 |
|  |  |  | SPECC1L   | 1.21  | 1.26E-02 | TSPYL5    | -2.95 | 9.73E-03 |
|  |  |  | TMPRSS11E | 5.32  | 1.38E-02 | ID3       | -2.25 | 9.93E-03 |
|  |  |  | LRRC31    | -3.04 | 1.39E-02 | IL3RA     | 1.53  | 1.04E-02 |
|  |  |  | SEMA3D    | 3.49  | 1.39E-02 | FUT1      | -1.03 | 1.04E-02 |
|  |  |  | SELENBP1  | -1.98 | 1.39E-02 | KRTAP19-1 | -5.87 | 1.04E-02 |
|  |  |  | LRRN1     | 4.41  | 1.44E-02 | SLC38A5   | 3.38  | 1.06E-02 |
|  |  |  | KITLG     | 2.11  | 1.44E-02 | GADD45A   | -1.81 | 1.07E-02 |
|  |  |  | OTOP1     | 8.27  | 1.50E-02 | SPRR3     | -6.76 | 1.07E-02 |
|  |  |  | HSD17B14  | 1.54  | 1.50E-02 | FCGBP     | 4.71  | 1.07E-02 |
|  |  |  | S100A4    | 2.23  | 1.51E-02 | KITLG     | -1.88 | 1.11E-02 |
|  |  |  | PIR       | 1.95  | 1.56E-02 | GRAMD2    | 2.55  | 1.11E-02 |
|  |  |  | B4GALNT3  | -2.21 | 1.64E-02 | TRIM40    | 2.72  | 1.11E-02 |
|  |  |  | FRMD1     | -3.75 | 1.70E-02 | C10orf99  | 4.44  | 1.11E-02 |
|  |  |  | SLC6A15   | 9.05  | 1.71E-02 | MISP      | 1.44  | 1.13E-02 |
|  |  |  | ATP4A     | 5.49  | 1.71E-02 | MSX1      | -3.22 | 1.17E-02 |
|  |  |  | FUT1      | 1.10  | 1.71E-02 | GPR98     | -3.34 | 1.17E-02 |
|  |  |  | PIGR      | -4.89 | 1.76E-02 | FRMD1     | 3.36  | 1.20E-02 |
|  |  |  | CXorf48   | 4.96  | 1.76E-02 | SERPINI1  | -2.99 | 1.20E-02 |

|  |  |  |         |       |          |          |       |          |
|--|--|--|---------|-------|----------|----------|-------|----------|
|  |  |  | B3GNT3  | -1.82 | 1.78E-02 | FGF19    | -4.64 | 1.32E-02 |
|  |  |  | TMEM158 | 4.00  | 1.78E-02 | HOXC8    | -3.69 | 1.32E-02 |
|  |  |  | ASPCR1  | 2.22  | 1.78E-02 | MCOLN2   | 2.53  | 1.40E-02 |
|  |  |  | PRAME   | 4.07  | 1.93E-02 | SDR16C5  | -3.37 | 1.40E-02 |
|  |  |  | FAHD2B  | 1.87  | 1.94E-02 | G6PD     | -1.75 | 1.40E-02 |
|  |  |  | SBSN    | 5.53  | 1.94E-02 | SCN5A    | -4.36 | 1.46E-02 |
|  |  |  | EPHB3   | -2.53 | 1.96E-02 | S100A7   | -5.62 | 1.50E-02 |
|  |  |  | SRPK1   | -0.94 | 1.96E-02 | GNAI1    | -2.80 | 1.50E-02 |
|  |  |  | AKR1B15 | 4.50  | 1.96E-02 | NWD1     | 2.61  | 1.50E-02 |
|  |  |  | KRT16   | 4.71  | 1.96E-02 | CDK5R1   | -2.06 | 1.73E-02 |
|  |  |  | RAB3D   | -1.49 | 2.10E-02 | UGT2B17  | 4.02  | 1.74E-02 |
|  |  |  | S100PBP | 1.13  | 2.11E-02 | DLL4     | 1.21  | 1.76E-02 |
|  |  |  | CHRM5   | 3.20  | 2.11E-02 | RPS28    | 1.42  | 1.83E-02 |
|  |  |  | CCDC88B | -2.41 | 2.19E-02 | SOX21    | -5.63 | 1.87E-02 |
|  |  |  | FCHO1   | -1.93 | 2.24E-02 | HIST1H3E | -2.30 | 1.93E-02 |
|  |  |  | CEP192  | 1.39  | 2.39E-02 | DEFA5    | -5.89 | 2.07E-02 |
|  |  |  | IL3RA   | -1.60 | 2.53E-02 | PTGDR    | 3.44  | 2.10E-02 |
|  |  |  | PTGDR   | -3.85 | 2.53E-02 | NAA40    | -1.23 | 2.12E-02 |
|  |  |  | PDE4A   | -1.68 | 2.53E-02 | LMO4     | -2.16 | 2.12E-02 |
|  |  |  | CERCAM  | 1.89  | 2.57E-02 | LY6G6F   | 3.21  | 2.14E-02 |
|  |  |  | TGFB2   | 3.38  | 2.65E-02 | TTLL7    | -2.81 | 2.21E-02 |
|  |  |  | RFX8    | 2.12  | 2.65E-02 | DLX5     | -6.09 | 2.21E-02 |
|  |  |  | CXCR4   | 1.95  | 2.65E-02 | SMAD6    | -1.36 | 2.21E-02 |
|  |  |  | NRARP   | -1.64 | 2.65E-02 | CEACAM7  | 4.47  | 2.21E-02 |
|  |  |  | UNC13C  | 5.84  | 2.65E-02 | CYP26B1  | -2.18 | 2.31E-02 |
|  |  |  | FSCN1   | 2.69  | 2.71E-02 | TRIP13   | -1.24 | 2.31E-02 |
|  |  |  | NWD1    | -2.79 | 2.73E-02 | DNALI1   | -2.39 | 2.33E-02 |
|  |  |  | INSM1   | 5.42  | 2.73E-02 | PRSS56   | -6.28 | 2.42E-02 |

|  |  |  |          |       |          |          |       |          |
|--|--|--|----------|-------|----------|----------|-------|----------|
|  |  |  | FBXL14   | -1.78 | 2.74E-02 | CDHR1    | 3.37  | 2.42E-02 |
|  |  |  | CHORDC1  | 1.16  | 2.82E-02 | C17orf78 | -4.88 | 2.49E-02 |
|  |  |  | C10orf71 | 7.52  | 2.82E-02 | EREG     | 2.66  | 2.52E-02 |
|  |  |  | CT45A5   | 8.91  | 2.83E-02 | AP3M2    | -1.12 | 2.55E-02 |
|  |  |  | FAIM2    | -2.99 | 2.89E-02 | RPL36    | 1.35  | 2.55E-02 |
|  |  |  | TPM4     | -0.94 | 2.91E-02 | FCHO1    | 1.71  | 2.55E-02 |
|  |  |  | LNP1     | 1.33  | 2.91E-02 | CXCR4    | -1.71 | 2.60E-02 |
|  |  |  | PIAS3    | 1.87  | 2.97E-02 | SOD3     | 2.24  | 2.63E-02 |
|  |  |  | CT45A4   | 8.27  | 2.97E-02 | MICU3    | -2.00 | 2.63E-02 |
|  |  |  | LYZL2    | 4.33  | 3.09E-02 | FOXD4L2  | -3.01 | 2.72E-02 |
|  |  |  | KREMEN2  | 3.09  | 3.09E-02 | POF1B    | 1.05  | 2.77E-02 |
|  |  |  | TMPRSS5  | 3.86  | 3.11E-02 | PLAGL1   | 1.88  | 2.79E-02 |
|  |  |  | CEACAM7  | -4.92 | 3.14E-02 | PTBP2    | -1.17 | 2.85E-02 |
|  |  |  | DCAF4L2  | 9.17  | 3.22E-02 | NAPG     | -1.22 | 2.87E-02 |
|  |  |  | CDH19    | 3.49  | 3.25E-02 | COL4A6   | -5.81 | 2.88E-02 |
|  |  |  | SLC38A5  | -3.49 | 3.30E-02 | MRAP2    | 3.01  | 2.88E-02 |
|  |  |  | OPRD1    | 4.29  | 3.31E-02 | CEP72    | -2.21 | 2.90E-02 |
|  |  |  | TRIM62   | 2.08  | 3.31E-02 | PPM1L    | -1.84 | 2.94E-02 |
|  |  |  | NR2C1    | 1.10  | 3.56E-02 | IL17RD   | -3.02 | 2.95E-02 |
|  |  |  | CTLA4    | 3.41  | 3.70E-02 | NOS2     | 2.80  | 2.97E-02 |
|  |  |  | TMEM173  | -1.55 | 3.75E-02 | LY6G6D   | 3.36  | 3.15E-02 |
|  |  |  | ANKRD35  | 4.07  | 3.80E-02 | SLITRK6  | -4.27 | 3.16E-02 |
|  |  |  | OSBPL6   | 2.71  | 3.80E-02 | GPAM     | -1.55 | 3.22E-02 |
|  |  |  | SMIM10   | 2.12  | 3.80E-02 | CDC45    | -1.08 | 3.33E-02 |
|  |  |  | NAPG     | 1.36  | 3.80E-02 | ZDHHC11  | -2.42 | 3.35E-02 |
|  |  |  | TPRN     | -1.42 | 3.81E-02 | TPRN     | 1.24  | 3.35E-02 |
|  |  |  | EMB      | 2.81  | 3.93E-02 | DIO3     | 2.65  | 3.35E-02 |
|  |  |  | GRAMD2   | -2.57 | 3.96E-02 | LPAR2    | -2.23 | 3.35E-02 |

|  |  |  |          |       |          |          |       |          |
|--|--|--|----------|-------|----------|----------|-------|----------|
|  |  |  | ZNF280B  | 1.56  | 3.96E-02 | DYNC2H1  | -1.17 | 3.44E-02 |
|  |  |  | GPD1L    | -1.23 | 3.96E-02 | GGT6     | 2.61  | 3.55E-02 |
|  |  |  | AKR1B10  | 3.68  | 3.96E-02 | DUSP4    | -2.08 | 3.62E-02 |
|  |  |  | TSPYL5   | 2.94  | 3.97E-02 | NRARP    | 1.40  | 3.69E-02 |
|  |  |  | LCN2     | -2.63 | 4.01E-02 | SLC12A2  | 1.36  | 3.84E-02 |
|  |  |  | KLHL14   | 4.12  | 4.02E-02 | SLC26A2  | 2.45  | 3.84E-02 |
|  |  |  | ARHGEF40 | -1.36 | 4.11E-02 | CSRNP3   | -2.45 | 4.13E-02 |
|  |  |  | NDST4    | 5.64  | 4.13E-02 | PIR      | -1.59 | 4.13E-02 |
|  |  |  | C10orf99 | -4.48 | 4.13E-02 | EID3     | -1.74 | 4.13E-02 |
|  |  |  | KHNYN    | -0.95 | 4.17E-02 | MTSS1L   | -1.57 | 4.13E-02 |
|  |  |  | UNC80    | 4.22  | 4.26E-02 | CDH19    | -2.99 | 4.13E-02 |
|  |  |  | AP1M2    | -1.25 | 4.26E-02 | KIF1A    | -4.73 | 4.16E-02 |
|  |  |  | CCNE1    | 1.93  | 4.26E-02 | GPR64    | 3.80  | 4.16E-02 |
|  |  |  | SPRR3    | 6.97  | 4.30E-02 | CLN3     | 1.36  | 4.40E-02 |
|  |  |  | TMEM163  | 2.70  | 4.30E-02 | ARL4C    | -1.35 | 4.51E-02 |
|  |  |  | SOWAHB   | -1.25 | 4.30E-02 | SERPINB4 | -4.07 | 4.56E-02 |
|  |  |  | ATP1B4   | 7.84  | 4.30E-02 | REEP1    | 2.90  | 4.56E-02 |
|  |  |  | CYP26B1  | 2.33  | 4.39E-02 | TMPRSS3  | -1.75 | 4.72E-02 |
|  |  |  | MCOLN2   | -2.57 | 4.45E-02 | UBA52    | 1.02  | 4.78E-02 |
|  |  |  | NRSN1    | 5.52  | 4.45E-02 | HOMER1   | -1.53 | 4.80E-02 |
|  |  |  | PLA2G4A  | 2.12  | 4.47E-02 | BATF2    | 1.97  | 4.81E-02 |
|  |  |  | BMI1     | 1.10  | 4.50E-02 | PTPRZ1   | -4.71 | 4.84E-02 |
|  |  |  | INHBB    | 2.98  | 4.72E-02 | CCDC88B  | 2.00  | 4.84E-02 |
|  |  |  | LMO4     | 2.27  | 4.79E-02 | PRDM7    | -3.91 | 4.84E-02 |
|  |  |  | B3GALT2  | 3.31  | 4.79E-02 | LRRN1    | -3.42 | 4.85E-02 |
|  |  |  | ZDHC11   | 2.65  | 4.79E-02 | NSG1     | -3.29 | 4.85E-02 |
|  |  |  | CDC45    | 1.16  | 4.79E-02 | ZNF439   | 1.59  | 4.85E-02 |
|  |  |  | DLL4     | -1.25 | 4.89E-02 | TRNP1    | -2.10 | 4.88E-02 |

|  |  |  |                |              |                 |                 |              |                 |
|--|--|--|----------------|--------------|-----------------|-----------------|--------------|-----------------|
|  |  |  | <b>NT5DC2</b>  | <b>1.58</b>  | <b>4.94E-02</b> | <b>SLC38A11</b> | <b>-3.52</b> | <b>4.95E-02</b> |
|  |  |  | <b>KIF21B</b>  | <b>-1.70</b> | <b>4.98E-02</b> |                 |              |                 |
|  |  |  | <b>GOLPH3L</b> | <b>-0.92</b> | <b>4.98E-02</b> |                 |              |                 |

**Table S14:** List of genes in the gene set

| Adheren<br>s_juncti<br>on | Tight_<br>junction | Cancer_mesen<br>chymal_transit<br>ion | EMT         | WNT_bCat<br>enin_signal<br>ing | TGFB_response_si<br>gnature_of_fibrobl<br>asts | TGFB_response_<br>signature_of_T_c<br>ells | TGFB_response_sigmat<br>ure_of_macrophage_c<br>ells | TGFB_response_signa<br>ture_of_endothelial_<br>cells | Activation_of<br>_MAPK_activ<br>ity | PI3K_<br>activi<br>ty | VEGF_<br>signali<br>ng |
|---------------------------|--------------------|---------------------------------------|-------------|--------------------------------|------------------------------------------------|--------------------------------------------|-----------------------------------------------------|------------------------------------------------------|-------------------------------------|-----------------------|------------------------|
| NECTIN1                   | CRB3               | ACTA2                                 | ABI3<br>BP  | ADAM17                         | FLT1                                           | TIMP1                                      | C5orf23                                             | ASAP1                                                | ADAM8                               | ATM                   | FIGF                   |
| NECTIN2                   | CLDN4              | ADAM12                                | ACTA<br>2   | AXIN1                          | FLT1                                           | RAB31                                      | RAI14                                               | SAV1                                                 | ADORA2B                             | BTC                   | FLT1                   |
| NECTIN3                   | CLDN3              | AEBP1                                 | ADA<br>M12  | AXIN2                          | COL10A1                                        | CLIC4                                      | NA                                                  | WWTR1                                                | ADRA2A                              | CD19                  | FLT4                   |
| NECTIN4                   | CLDN7              | ASPN                                  | ANP<br>EP   | CCND2                          | IGFBP3                                         | MXRA7                                      | AHNAK2                                              | ZNF532                                               | ADRA2B                              | CD28                  | KDR                    |
| PARD3                     | CLDN1<br>9         | BGN                                   | APLP<br>1   | CSNK1E                         | NOX4                                           | SERPINE1                                   | ZNF532                                              | ARL4C                                                | ADRA2C                              | CD80                  | NRP1                   |
| SRC                       | CLDN1<br>6         | C1QTNF3                               | ARE<br>G    | CTNNB1                         | MEX3B                                          | INPP5F                                     | CEP170                                              | PALM2-AKAP2                                          | ALK                                 | CD86                  | NRP2                   |
| FARP2                     | CLDN1<br>4         | C7orf10                               | BASP<br>1   | CUL1                           | GAS1                                           | GEM                                        | POSTN                                               | NRP1                                                 | ARRB1                               | EGF                   | PDGFC                  |
| CDC42                     | CLDN1<br>5         | CDH11                                 | BDN<br>F    | DKK1                           | INHBA                                          | RAB31                                      | PALM2-AKAP2                                         | CEP170                                               | AVP11                               | EGFR                  | VEGFA                  |
| RAC1                      | CLDN1<br>7         | COL10A1                               | BGN         | DKK4                           | VEGFA                                          | SERPINE1                                   | CEP170                                              | BNIP3L                                               | AXIN1                               | ERBB<br>2             | VEGFB                  |
| RAC2                      | CLDN2<br>0         | COL11A1                               | BMP<br>1    | DLL1                           | CDKN2B                                         | ANXA5                                      | SPP1                                                | RBMS1                                                | BIRC7                               | ERBB<br>3             | VEGFC                  |
| RAC3                      | CLDN1<br>1         | COL1A1                                | CAD<br>M1   | DVL2                           | NA                                             | RAB31                                      | NA                                                  | MYOF                                                 | BMP2                                | ERBB<br>4             |                        |
| WAS                       | CLDN1<br>8         | COL1A2                                | CALD<br>1   | FRAT1                          | FBXO32                                         | LMCD1                                      | VEGFA                                               | TGFB1                                                | C1QTNF2                             | EREG                  |                        |
| WASL                      | CLDN2<br>2         | COL3A1                                | CALU        | FZD1                           | NA                                             | CST6                                       | ERRFI1                                              | HIP1                                                 | C5                                  | FGF1                  |                        |
| IQGAP1                    | CLDN5              | COL5A1                                | CAP2        | FZD8                           | CALB2                                          | RBPJ                                       | APOE                                                | RBMS1                                                | C5AR1                               | FGF1<br>0             |                        |
| BAIAP2                    | CLDN1<br>0         | COL5A2                                | CAP<br>G    | GNAI1                          | CTGF                                           | RASGRP3                                    | FBXO32                                              | ANGPT2                                               | CCL19                               | FGF1<br>6             |                        |
| WASF1                     | CLDN8              | COL6A2                                | CD44        | HDAC11                         | VEGFA                                          | CLIC4                                      | PCOLCE2                                             | CDH2                                                 | CD40LG                              | FGF1<br>7             |                        |
| WASF2                     | CLDN6              | COL6A3                                | CD59        | HDAC2                          | VEGFA                                          | PLAU                                       | EHD2                                                | VEGFA                                                | CD74                                | FGF1<br>8             |                        |
| WASF3                     | CLDN2              | COMP                                  | CDH<br>11   | HDAC5                          | KANK4                                          | LOH3CR2A                                   | NA                                                  | UGCG                                                 | CD81                                | FGF1<br>9             |                        |
| AFDN                      | CLDN1              | COPZ2                                 | CDH<br>2    | HEY1                           | NET1                                           | ITGAV                                      | ENO2                                                | PLOD2                                                | CDK1                                | FGF2                  |                        |
| LMO7                      | CLDN9              | CRISPLD2                              | CDH<br>6    | HEY2                           | HEY1                                           | MXRA7                                      | KCNJ8                                               | IDS                                                  | CHRNA7                              | FGF2<br>0             |                        |
| SSX2IP                    | CLDN2<br>3         | CTSK                                  | COL1<br>1A1 | JAG1                           | SERPINE1                                       | MAP4                                       | PLAUR                                               | RNF13                                                | CSPG4                               | FGF2<br>2             |                        |

|             |              |        |             |        |          |       |          |          |        |           |  |
|-------------|--------------|--------|-------------|--------|----------|-------|----------|----------|--------|-----------|--|
| SORBS1      | CLDN2<br>5   | DCN    | COL1<br>2A1 | JAG2   | ESM1     | MAP4  | TANC2    | SPOCK1   | CXCR4  | FGF2<br>3 |  |
| ACTN1       | CLDN2<br>4   | EDNRA  | COL1<br>6A1 | KAT2A  | NET1     | KLF7  | VCAN     | WWC2     | DAB2IP | FGF3      |  |
| ACTN4       | OCLN         | EPYC   | COL1<br>A1  | LEF1   | NOX4     | ABHD2 | NA       | FAP      | DAXX   | FGF4      |  |
| VCL         | F11R         | FAP    | COL1<br>A2  | MAML1  | TIMP3    | BMP1  | NA       | RBMS1    | DBNL   | FGF5      |  |
| TJP1        | JAM2         | FBN1   | COL3<br>A1  | MYC    | SYNE1    | KCNK1 | PLAUR    | EMP1     | DRD4   | FGF6      |  |
| CDH1        | JAM3         | FN1    | COL4<br>A1  | NCOR2  | BHLHE40  | BMP1  | CD109    | COL5A2   | DUSP5  | FGF7      |  |
| CTNND1      | BVES         | GLT8D2 | COL4<br>A2  | NCSTN  | PLAUR    | RGS16 | NA       | ALCAM    | DUSP6  | FGF8      |  |
| CTNNB1      | CDC42        | GREM1  | COL5<br>A1  | NKD1   | APBB2    | ATXN1 | VCAN     | VCAN     | DUSP7  | FGF9      |  |
| CTNNA3      | PARD6<br>A   | HNT    | COL5<br>A2  | NOTCH1 | FGF1     | CST6  | CDKN1C   | VCAN     | DUSP9  | FGFR<br>1 |  |
| CTNNA1      | PARD6<br>G   | INHBA  | COL5<br>A3  | NOTCH4 | TIMP3    | NMB   | VEGFA    | CALD1    | EFNA1  | FGFR<br>2 |  |
| CTNNA2      | PARD6<br>B   | ITGBL1 | COL6<br>A2  | NUMB   | SERPINE1 | KCNK1 | PLA2G16  | AKAP13   | EGF    | FGFR<br>3 |  |
| ACTB        | MPP5         | LGALS1 | COL6<br>A3  | PPARD  | ANGPTL4  | PLAU  | AXL      | CHMP2B   | EPGN   | FGFR<br>4 |  |
| ACTG1       | MPP4         | LOX    | COL7<br>A1  | PSEN2  | LMCD1    | RGS16 | NA       | STX7     | ERCC6  | FRS2      |  |
| RHOA        | TJP3         | LOXL2  | COL8<br>A2  | PTCH1  | NA       | MAP4  | KANK4    | MAP1B    | ERN1   | FYN       |  |
| PTPRM       | PATJ         | LRRC15 | COM<br>P    | RBPJ   | FGF1     | BMP1  | PLOD2    | DCBLD2   | ERP29  | GAB1      |  |
| PTPRB       | MPDZ         | LUM    | COP<br>A    | SKP2   | SYNE1    | EGR2  | ULBP2    | PTRF     | FCER1A | GRB2      |  |
| PTPRF       | PRKCZ        | MFAP5  | CRLF<br>1   | TCF7   | PGM2L1   | IL1RN | RASSF8   | FBN1     | FGF10  | HBEG<br>F |  |
| PTPN1       | PRKCI        | MMP11  | CTGF        | TP53   | KAL1     | MAP4  | TBC1D8   | LRRFIP1  | FGF2   | IRS1      |  |
| PTPN6       | AMOT         | MMP2   | CTH<br>RC1  | WNT1   | TNFAIP6  | ABHD2 | SERPINE1 | SLC25A36 | FPR1   | IRS2      |  |
| PTPRJ       | AMOT<br>L1   | MXRA5  | CXCL<br>1   | WNT5B  | OSGIN2   | ATXN1 | SOX11    | SULF1    | FRS2   | KIT       |  |
| CSNK2A<br>1 | AMOT<br>L2   | NID2   | CXCL<br>12  | WNT6   | PODXL    | IL1RN | VCAN     | 10-Sep   | GAB1   | KITLG     |  |
| CSNK2A<br>2 | ARHG<br>AP17 | NOX4   | CXCL<br>6   |        | PCDH9    | CLIC4 | DOCK4    | CALD1    | GHR    | KL        |  |
| CSNK2A<br>3 | RAC1         | NUAK1  | CYR6<br>1   |        | C13orf33 | KLF10 | SULF1    | ACVR1    | GHRL   | KLB       |  |



|        |             |          |            |  |          |          |          |           |          |             |  |
|--------|-------------|----------|------------|--|----------|----------|----------|-----------|----------|-------------|--|
| CSNK2B | NF2         | OLFML2B  | DAB<br>2   |  | RASGRP3  | APOD     | IER5L    | PAPPA     | GNG3     | LCK         |  |
| TCF7   | LLGL2       | PCOLCE   | DCN        |  | LOH3CR2A | IL1RN    | C15orf52 | GNB5      | GRM1     | NRG1        |  |
| TCF7L1 | LLGL1       | PDGFRB   | DKK<br>1   |  | SPSB1    | KLF7     | FGD6     | CAMSAP1L1 | GRM4     | NRG2        |  |
| TCF7L2 | DLG1        | PLAU     | DPYS<br>L3 |  | FN1      | LMCD1    | PDLIM7   | QKI       | HGF      | NRG4        |  |
| LEF1   | SCRIB       | POSTN    | DST        |  | GADD45B  | PIK3IP1  | EBF1     | PALLD     | IKBKG    | PDGF<br>A   |  |
| IGF1R  | PPP2C<br>A  | PRRX1    | ECM<br>1   |  | TRIB1    | CRIP1    | AMIGO2   | TNFRSF21  | IL1B     | PDGF<br>B   |  |
| INSR   | PPP2C<br>B  | RAB31    | ECM<br>2   |  | HEY1     | ATXN1    | NA       | NRP2      | INSR     | PDGF<br>RA  |  |
| MET    | PPP2R<br>1B | RCN3     | EDIL<br>3  |  | STK17B   | SLC5A3   | NA       | UBE2H     | IQGAP3   | PDGF<br>RB  |  |
| EGFR   | PPP2R<br>1A | SERPINF1 | EFE<br>MP2 |  | KLF7     | NR4A3    | NA       | FERMT2    | IRAK1    | PIK3C<br>2A |  |
| ERBB2  | PPP2R<br>2A | SFRP4    | ELN        |  | LRRC8C   | EVI2A    | PTPRM    | CDC42BPA  | IRAK2    | PIK3C<br>2B |  |
| FGFR1  | PPP2R<br>2B | SNAI2    | EMP<br>3   |  | FNIP2    | FAM102A  | VCAN     | ELK3      | ITGA1    | PIK3C<br>2G |  |
| FYN    | PPP2R<br>2C | SPARC    | ENO<br>2   |  | TGFB2    | TIAM1    | BHLHE40  | CALU      | KIAA1804 | PIK3C<br>3  |  |
| YES1   | PPP2R<br>2D | SPOCK1   | FAP        |  | FRMD4A   | ALOX5AP  | BACH2    | OSBPL1A   | KIT      | PIK3C<br>A  |  |
| MAPK1  | PARD3       | SULF1    | FAS        |  | NA       | ATXN1    | OLFML2B  | NRP1      | LPAR1    | PIK3C<br>B  |  |
| MAPK3  | TIAM1       | THBS2    | FBLN<br>1  |  | CNTN1    | ZNF365   | PLAUR    | CLIC4     | LPAR3    | PIK3C<br>D  |  |
| SNAI2  | TJP1        | THY1     | FBLN<br>2  |  | TIMP3    | MAP4     | NA       | SMAD3     | LRRK2    | PIK3C<br>G  |  |
| SNAI1  | TJAP1       | TIMP3    | FBLN<br>5  |  | APBB2    | PIK3IP1  | APBB2    | ANGPT2    | MADD     | PIK3R<br>1  |  |
| TGFBR1 | DLG2        | TMEM158  | FBN1       |  | NGF      | SERPINE1 | MFGE8    | PICALM    | MAP2K1   | PIK3R<br>2  |  |
| TGFBR2 | DLG3        | TNFAIP6  | FBN2       |  | NUAK1    | MXRA7    | MYADM    | PLAU      | MAP2K2   | PIK3R<br>3  |  |
| SMAD2  | NEDD<br>4   | VCAN     | FER<br>MT2 |  | NA       | SLC5A3   | SLC16A6  | FN1       | MAP2K3   | PIK3R<br>4  |  |
| SMAD3  | NEDD<br>4L  |          | FGF2       |  | TNFAIP6  | RBPJ     | NA       | RHOQ      | MAP2K5   | PIK3R<br>5  |  |
| SMAD4  | CGN         |          | FLNA       |  | NA       | TNFSF4   | SERPINE1 | LRP12     | MAP2K6   | PIK3R<br>6  |  |
| CREBBP | CGNL1       |          | FMO<br>D   |  | EFNB2    | PPAP2A   | ACTN1    | FGFR1     | MAP2K7   | PTPN<br>11  |  |

|        |              |  |                 |  |           |            |           |         |          |           |  |
|--------|--------------|--|-----------------|--|-----------|------------|-----------|---------|----------|-----------|--|
| EP300  | ARHG<br>EF2  |  | FN1             |  | TSPAN2    | PKIA       | OLR1      | BAG2    | MAP3K10  | TLR9      |  |
| MAP3K7 | RHOA         |  | FOXC<br>2       |  | NA        | PKIA       | DPP4      | RHOQ    | MAP3K11  | TRAT<br>1 |  |
| NLK    | GATA4        |  | FSTL<br>1       |  | FN1       | FBXO11     | CD109     | CCDC88A | MAP3K2   | VAV1      |  |
| FER    | MARV<br>ELD3 |  | FSTL<br>3       |  | CHST11    | DCLRE1C    | TRNP1     | KLF7    | MAP3K5   |           |  |
| ACP1   | MAP3<br>K1   |  | FUC<br>A1       |  | NA        | ABHD2      | IGFBP4    | ANXA3   | MAP3K6   |           |  |
|        | MAPK<br>8    |  | FZD8            |  | STK17B    | SOX4       | B3GALNT1  | UBE2H   | MAP3K7   |           |  |
|        | MAPK<br>10   |  | GAD<br>D45<br>A |  | VEGFA     | C18orf1    | PCDHB2    | PTPRR   | MAP3K9   |           |  |
|        | MAPK<br>9    |  | GAD<br>D45B     |  | BHLHE40   | RBPJ       | NA        | RDX     | MAP4K1   |           |  |
|        | JUN          |  | GAS<br>1        |  | EGR2      | SLC5A3     | ABLIM3    | MPDZ    | MAP4K2   |           |  |
|        | CD1A         |  | GEM             |  | DAAM1     | BMP1       | NA        | TRAM1   | MAP4K5   |           |  |
|        | CD1B         |  | GJA1            |  | PALLD     | NPTX1      | LMTK3     | COL4A2  | MAPK1    |           |  |
|        | CD1C         |  | GLIP<br>R1      |  | FNIP2     | ABHD2      | NA        | CALD1   | MAPK10   |           |  |
|        | CD1D         |  | GLT2<br>5D1     |  | GPR161    | BMP1       | HTRA1     | STAG2   | MAPK11   |           |  |
|        | CD1E         |  | GPC1            |  | CALD1     | SLC5A3     | NA        | TPM4    | MAPK14   |           |  |
|        | CFTR         |  | GPX7            |  | LOC728449 | ABHD2      | CLDN11    | BGN     | MAPK3    |           |  |
|        | CDK4         |  | GRE<br>M1       |  | TIMP3     | CSGALNACT1 | TMCC3     | NOTCH2  | MAPK8IP3 |           |  |
|        | YBX3         |  | HTR<br>A1       |  | FNIP2     | IL1RN      | DPYSL3    | BMPR2   | MAPKAPK2 |           |  |
|        | SYMP<br>K    |  | ID2             |  | NA        | CSGALNACT1 | ADAMTS2   | TM6SF1  | MAPKAPK3 |           |  |
|        | PCNA         |  | IGFB<br>P2      |  | MGC16121  | TMOD1      | LOC641518 | RRAS2   | MAPKAPK5 |           |  |
|        | CCND<br>1    |  | IGFB<br>P3      |  | HIVEP2    | ABHD2      | MYH10     | MEF2A   | MDFI     |           |  |
|        | ERBB2        |  | IGFB<br>P4      |  | RHOU      | SOX4       | CST6      | ZNF281  | MDFIC    |           |  |
|        | RUNX<br>1    |  | IL15            |  | KDM6B     | KCNK1      | SKI       | CALCRL  | MOS      |           |  |
|        | HSPA4        |  | IL32            |  | FOXP1     | SOX4       | ELK3      | UBE2W   | MUC20    |           |  |

|  |          |  |           |  |            |         |         |         |         |  |  |
|--|----------|--|-----------|--|------------|---------|---------|---------|---------|--|--|
|  | SLC9A3R1 |  | IL6       |  | ELMOD1     | ATP1B1  | FGD6    | PTPN14  | MUL1    |  |  |
|  | EZR      |  | IL8       |  | SEMA7A     | CCR4    | PHLDA1  | DPYSL3  | NOD1    |  |  |
|  | RDX      |  | INHB<br>A |  | PTHLH      | CD83    | NA      | IGFBP5  | NOD2    |  |  |
|  | MSN      |  | ITGA<br>2 |  | PMEPA1     | LRIG1   | SLC16A6 | GPR176  | NTF3    |  |  |
|  | PRKCE    |  | ITGA<br>5 |  | APBB2      | FBXO11  | KAL1    | FADS3   | NTRK3   |  |  |
|  | ACTB     |  | ITGA<br>V |  | CDKN2B     | ADO     | CCDC88A | TRIB2   | P2RX7   |  |  |
|  | ACTG1    |  | ITGB<br>1 |  | DAAM1      | LRBA    | CYTH3   | FN1     | PAK3    |  |  |
|  | CACNA1D  |  | ITGB<br>3 |  | HAS2       | LMCD1   | ATP10A  | COL8A1  | PDE6G   |  |  |
|  | MAP3K5   |  | ITGB<br>5 |  | TGFB2      | SOX4    | ITGA5   | ODZ3    | PDE6H   |  |  |
|  | MAP2K7   |  | JUN       |  | ANGPTL4    | DIXDC1  | PLOD2   | MACF1   | PEA15   |  |  |
|  | SRC      |  | LAMA1     |  | KLF7       | PPAP2A  | SLC43A3 | TMEFF1  | PIK3CB  |  |  |
|  | CTTN     |  | LAMA2     |  | KDM6B      | SOX4    | EBF1    | AKT3    | PKN1    |  |  |
|  | HCLS1    |  | LAMA3     |  | LMCD1      | IL1RN   | ZNF281  | MACF1   | PLA2G1B |  |  |
|  | ACTR2    |  | LAMC1     |  | PGM2L1     | SOX4    | ADAM12  | MBNL2   | PLCE1   |  |  |
|  | ACTR3B   |  | LAMC2     |  | SNORD114-3 | SYNJ2   | HSPG2   | MACF1   | PRKAA1  |  |  |
|  | ACTR3C   |  | LEPRE1    |  | NA         | DIXDC1  | PTPRM   | LAMA4   | PROK1   |  |  |
|  | ACTR3    |  | LGALS1    |  | GRB14      | NR4A3   | MSR1    | TRAK1   | PROK2   |  |  |
|  | WHAMM    |  | LOX       |  | LIF        | RIMS3   | LAMC1   | ABCA1   | PTPLAD1 |  |  |
|  | WAS      |  | LOXL1     |  | PTHLH      | JUN     | APOC1   | EMCN    | PTPN1   |  |  |
|  | WASL     |  | LOXL2     |  | CHST11     | CD96    | PDLIM4  | AIDA    | PTPN11  |  |  |
|  | VASP     |  | LRP1      |  | TSHZ3      | DCLRE1C | NA      | FAM129A | RIPK1   |  |  |
|  | PRKACA   |  | LRRC15    |  | PDLIM4     | CD96    | VSIG10L | THBS1   | RIPK2   |  |  |
|  | PRKACB   |  | LUM       |  | TSPAN2     | KLF7    | PACSIN3 | RDX     | RPS27A  |  |  |

|  |              |  |             |  |           |         |           |          |         |  |  |
|--|--------------|--|-------------|--|-----------|---------|-----------|----------|---------|--|--|
|  | PRKAC<br>G   |  | MAG<br>EE1  |  | FOXP1     | INPP5F  | B3GALNT1  | PIK3CA   | S1PR2   |  |  |
|  | RAB13        |  | MAT<br>N2   |  | LOC728264 | PRKCD   | LARP6     | SERPINB2 | SAA1    |  |  |
|  | ARHG<br>EF18 |  | MAT<br>N3   |  | TSHZ3     | S100PBP | THBS1     | PERP     | SHC1    |  |  |
|  | ROCK<br>1    |  | MC<br>M7    |  | ZNF365    | LRBA    | CXCR7     | MCTP1    | SHC2    |  |  |
|  | ROCK<br>2    |  | MES<br>T    |  | HAS2      | S100PBP | PDLIM7    | PDP1     | SOD1    |  |  |
|  | MYL2         |  | MFA<br>P5   |  | APBB2     | HLF     | GABARAPL1 | OSMR     | SPAG9   |  |  |
|  | EPB41<br>L4B |  | MGP         |  | SERPINE1  | MAP4    | SLC11A1   | POLR2K   | SYK     |  |  |
|  | STK11        |  | MM<br>P1    |  | PDGFC     | HLF     | NA        | MAP1LC3B | TAB1    |  |  |
|  | PRKA<br>A1   |  | MM<br>P14   |  | JUNB      | ABCC4   | APOC1     | EZR      | TAB2    |  |  |
|  | PRKA<br>A2   |  | MM<br>P2    |  | PMEP A1   | HLF     | GADD45B   | FERMT2   | TAB3    |  |  |
|  | PRKA<br>B1   |  | MM<br>P3    |  | OSGIN2    | INPP5F  | BTG1      | ADAM10   | TDGF1   |  |  |
|  | PRKA<br>B2   |  | MSX<br>1    |  | CILP      | SYNJ2   | MMP8      | BMPR2    | TGFA    |  |  |
|  | PRKA<br>G1   |  | MXR<br>A5   |  | PGM2L1    | KCNK1   | ELK3      | ARPP19   | TGFB3   |  |  |
|  | PRKA<br>G3   |  | MYL<br>9    |  | NA        | CXCL13  | ITGAV     | CLIC4    | THBS1   |  |  |
|  | PRKA<br>G2   |  | MYL<br>K    |  | KDM6B     | PPARG   | TANC2     | LTBP1    | TLR4    |  |  |
|  | MYH1<br>5    |  | NID2        |  | NA        | ABCC4   | SPHK1     | CLDND1   | TNF     |  |  |
|  | MYH1         |  | NNM<br>T    |  | NA        | ADO     | GDF5      | DUSP3    | TNFSF11 |  |  |
|  | MYH2         |  | NOT<br>CH2  |  | BPGM      | AHCYL2  | ABHD2     | TXNIP    | TP73    |  |  |
|  | MYH3         |  | NT5E        |  | ARHGEF3   | FBXO11  | HPGD      | SUSD5    | TRAF6   |  |  |
|  | MYH4         |  | NTM         |  | PGBD5     | SYNJ2   | KIAA1217  | ZEB1     | UBA52   |  |  |
|  | MYH8         |  | OXT<br>R    |  | TAGLN3    | AQP3    | PECAM1    | BACH1    | UBB     |  |  |
|  | MYH9         |  | PCOL<br>CE  |  | PTHLH     | PIK3IP1 | APOE      | EZR      | UBC     |  |  |
|  | MYH1<br>0    |  | PCOL<br>CE2 |  | TUFT1     | BMP1    | DPP4      | AZIN1    | WNT5A   |  |  |

|  |             |  |            |  |           |          |         |          |     |  |  |
|--|-------------|--|------------|--|-----------|----------|---------|----------|-----|--|--|
|  | MYH1<br>1   |  | PDG<br>FRB |  | GPR183    | AQP3     | PECAM1  | MAP4K5   | ZAK |  |  |
|  | MYH7<br>B   |  | PDLI<br>M4 |  | S1PR5     | DIXDC1   | PDE4DIP | DGKA     |     |  |  |
|  | MYH1<br>4   |  | PFN2       |  | STK17B    | C18orf1  | GADD45B | LEPR     |     |  |  |
|  | MYH1<br>3   |  | PLAU<br>R  |  | CLDN4     | JUN      | NA      | PRKCH    |     |  |  |
|  | MYL6<br>B   |  | PLO<br>D1  |  | MBOAT2    | TSPAN13  | FLCN    | PLEC     |     |  |  |
|  | MYL6        |  | PLO<br>D2  |  | CNNM4     | MAP4     | THBS3   | TCF7L2   |     |  |  |
|  | MYL9        |  | PLO<br>D3  |  | PMEP A1   | AHCYL2   | CXCR4   | TPM4     |     |  |  |
|  | MYL1<br>2B  |  | PME<br>PA1 |  | CALD1     | SLC1A4   | GPX3    | BCAT1    |     |  |  |
|  | MYL1<br>2A  |  | PMP<br>22  |  | DNAJB5    | ADO      | TM6SF1  | LBH      |     |  |  |
|  | IGSF5       |  | POST<br>N  |  | NA        | TFEB     | DLC1    | PEA15    |     |  |  |
|  | MAGI<br>1   |  | PIIB       |  | C3orf52   | C18orf1  | FKBP1B  | LEPR     |     |  |  |
|  | SYNP<br>O   |  | PRR<br>X1  |  | DHRS2     | ABCC4    | S100A2  | SLC39A6  |     |  |  |
|  | ACTN1       |  | PRSS<br>2  |  | SOX4      | LRIG1    | BEAN    | DNAJB4   |     |  |  |
|  | ACTN4       |  | PTHL<br>H  |  | DNAJB5    | TMOD1    | NMB     | APLP2    |     |  |  |
|  | MICAL<br>L2 |  | PTX3       |  | NA        | SYNJ2    | NAV1    | PDLIM5   |     |  |  |
|  | RAB8<br>A   |  | PVR        |  | LOC728264 | SYNJ2    | NA      | SAMD9    |     |  |  |
|  | RAB8B       |  | QSO<br>X1  |  | EPHA4     | ITGAE    | TREM1   | DEGS1    |     |  |  |
|  | RAPG<br>EF6 |  | RGS4       |  | COL27A1   | TFEB     | PDK4    | STC2     |     |  |  |
|  | RAP1<br>A   |  | RHO<br>B   |  | SMAD7     | NR4A3    | MEF2A   | MLLT10   |     |  |  |
|  | ITGB1       |  | SAT1       |  | F2RL1     | APOBEC3G | ST3GAL6 | NMD3     |     |  |  |
|  | AFDN        |  | SCG2       |  | NA        | SYNJ2    | NA      | SLC29A1  |     |  |  |
|  | TJP2        |  | SDC1       |  | NA        | CDYL     | CDK14   | ATP6V1C1 |     |  |  |
|  | RAPG<br>EF2 |  | SDC4       |  | NA        | ABCC4    | DPYSL3  | TLK1     |     |  |  |

|  |              |  |              |  |              |          |         |          |  |  |  |
|--|--------------|--|--------------|--|--------------|----------|---------|----------|--|--|--|
|  | RAP2C        |  | SERP<br>INE1 |  | KDM6B        | JUN      | SPTBN1  | PPAP2B   |  |  |  |
|  | MARV<br>ELD2 |  | SERP<br>INE2 |  | LOC100128178 | SLC1A4   | HPGD    | FXR1     |  |  |  |
|  | TUBA<br>1B   |  | SERP<br>INH1 |  | NA           | FBXO11   | CAMK2N1 | TGFB2    |  |  |  |
|  | TUBA<br>4A   |  | SFRP<br>1    |  | NA           | APOBEC3G | PHLDA1  | RANBP9   |  |  |  |
|  | TUBA<br>3C   |  | SFRP<br>4    |  | RASL12       | AQP3     | RUNX2   | PDLIM5   |  |  |  |
|  | TUBA<br>1A   |  | SGCB         |  | SLC35F2      | LRIG1    | SLIT3   | CHMP1B   |  |  |  |
|  | TUBA<br>1C   |  | SGC<br>D     |  | SETBP1       | IL7R     | HPGD    | ATP6V1G1 |  |  |  |
|  | TUBA<br>8    |  | SGC<br>G     |  | NA           | ZNF365   | USP46   | MCL1     |  |  |  |
|  | TUBA<br>3E   |  | SLC6<br>A8   |  | DOCK10       | DCLRE1C  | LRRC32  | SPTBN1   |  |  |  |
|  | TUBA<br>3D   |  | SLIT2        |  | NA           | IL9      | ANGPT2  | BCAT1    |  |  |  |
|  | TUBAL<br>3   |  | SLIT3        |  | C5orf13      | RASGRP3  | FADS3   | NCOA3    |  |  |  |
|  |              |  | SNAI<br>2    |  | DNAJC18      | BMP1     | ADAM9   | CALU     |  |  |  |
|  |              |  | SNTB<br>1    |  | DACT1        | SLC1A4   | CD151   | SMARCA2  |  |  |  |
|  |              |  | SPAR<br>C    |  | WNT9A        | RGS16    | RGS16   | MCFD2    |  |  |  |
|  |              |  | SPO<br>CK1   |  | ETV6         | ATP1B1   | GPX3    | TRIM23   |  |  |  |
|  |              |  | SPP1         |  | FGF18        | IL7R     | SLC44A2 | NAB1     |  |  |  |
|  |              |  | TAGL<br>N    |  | HBEGF        | SLC1A4   | GULP1   | ZEB1     |  |  |  |
|  |              |  | TFPI<br>2    |  | TNC          | TIAM1    | MID2    | ADAM10   |  |  |  |
|  |              |  | TGFB<br>1    |  | SDC1         | CDYL     | EBF1    | MAP3K7   |  |  |  |
|  |              |  | TGFB<br>I    |  | KIAA1755     | ZNF238   | ADAMTS2 | TPP1     |  |  |  |
|  |              |  | TGFB<br>R3   |  | COL27A1      | MYH6     | LYNX1   | FZD6     |  |  |  |
|  |              |  | TGM<br>2     |  | EDN1         | LRIG1    | COL22A1 | THBS1    |  |  |  |
|  |              |  | THBS<br>1    |  | HBEGF        | RIMS3    | NA      | MMP14    |  |  |  |

|  |  |  |           |  |           |         |           |           |  |  |  |
|--|--|--|-----------|--|-----------|---------|-----------|-----------|--|--|--|
|  |  |  | THBS2     |  | ITGB6     | SLC1A4  | BNC2      | CALU      |  |  |  |
|  |  |  | THY1      |  | MURC      | C18orf1 | NA        | KIDINS220 |  |  |  |
|  |  |  | TIMP1     |  | PTGS2     | GPR35   | SDCCAG8   | HMOX1     |  |  |  |
|  |  |  | TIMP3     |  | EPHA4     | DCLRE1C | ORAI2     | SPSB1     |  |  |  |
|  |  |  | TNC       |  | PLEK2     | CDYL    | MMP19     | BICD2     |  |  |  |
|  |  |  | TNFAIP3   |  | COL27A1   | SYNJ2   | THBS1     | ZFHX3     |  |  |  |
|  |  |  | TNFRSF11B |  | NA        | MB      | PDE4DIP   | OSBPL8    |  |  |  |
|  |  |  | TNFRSF12A |  | RHOA      | ZNF238  | DENND3    | WSB1      |  |  |  |
|  |  |  | TPM1      |  | NA        |         | BHLHE40   | APPL2     |  |  |  |
|  |  |  | TPM2      |  | LOC201651 |         | LAMC1     | USO1      |  |  |  |
|  |  |  | TPM4      |  | NA        |         | ZEB1      | DDA1      |  |  |  |
|  |  |  | VCA M1    |  | STEAP2    |         | HPGD      | PRKAR1A   |  |  |  |
|  |  |  | VCA N     |  | EDN1      |         | DNASE2    | IL6ST     |  |  |  |
|  |  |  | VEGF A    |  | SLC46A3   |         | NA        | PPAP2B    |  |  |  |
|  |  |  | VEGF C    |  | LMCD1     |         | NA        | IFNGR1    |  |  |  |
|  |  |  | VIM       |  | SNX30     |         | NA        | SNX3      |  |  |  |
|  |  |  | WIPF1     |  | SOX4      |         | NA        | TAB2      |  |  |  |
|  |  |  | WNT5A     |  | NA        |         | ADAM8     | YWHAZ     |  |  |  |
|  |  |  |           |  | RYBP      |         | FST       | SLC6A8    |  |  |  |
|  |  |  |           |  | NA        |         | IL1RAP    | APBB2     |  |  |  |
|  |  |  |           |  | SOX4      |         | FST       | MAF       |  |  |  |
|  |  |  |           |  | TMEM49    |         | GABARAPL1 | LEPR      |  |  |  |
|  |  |  |           |  | NA        |         | DLC1      | MMP14     |  |  |  |
|  |  |  |           |  | MGC16121  |         | AZI2      | PICALM    |  |  |  |

|  |  |  |  |  |              |  |         |         |  |  |  |
|--|--|--|--|--|--------------|--|---------|---------|--|--|--|
|  |  |  |  |  | SORBS2       |  | ABHD2   | CCNG2   |  |  |  |
|  |  |  |  |  | KDM6B        |  | THBS1   | SAR1A   |  |  |  |
|  |  |  |  |  | PTGS2        |  | SOC6    | RC3H2   |  |  |  |
|  |  |  |  |  | LOC100128178 |  | MRC2    | CCL2    |  |  |  |
|  |  |  |  |  | HIC1         |  | NA      | PDLIM7  |  |  |  |
|  |  |  |  |  | NEDD9        |  | UBXN2B  | HP55    |  |  |  |
|  |  |  |  |  | ARHGEF40     |  | NA      | SLC7A11 |  |  |  |
|  |  |  |  |  | FN1          |  | IL1RAP  | ICAM1   |  |  |  |
|  |  |  |  |  | IFIH1        |  | HTRA4   | FHL1    |  |  |  |
|  |  |  |  |  | GZMK         |  | BNC2    | IFI16   |  |  |  |
|  |  |  |  |  | VEPH1        |  | SPOCD1  | FAM129A |  |  |  |
|  |  |  |  |  | EPHA4        |  | ADARB1  | FHL1    |  |  |  |
|  |  |  |  |  | FOXP1        |  | ANO4    | VAMP3   |  |  |  |
|  |  |  |  |  | PIK3CD       |  | DFNB31  | FAM198B |  |  |  |
|  |  |  |  |  | IL6          |  | RGS1    | LAMA4   |  |  |  |
|  |  |  |  |  | YIPF5        |  | SDS     | F2R     |  |  |  |
|  |  |  |  |  | SKIL         |  | DCLK1   | RGS4    |  |  |  |
|  |  |  |  |  | RASD1        |  | OBSL1   | DNASE2  |  |  |  |
|  |  |  |  |  | JARID2       |  | DPP4    | JAG1    |  |  |  |
|  |  |  |  |  | NEDD9        |  | DFNB31  | IL32    |  |  |  |
|  |  |  |  |  | ETV6         |  | TMEM180 | SRGN    |  |  |  |
|  |  |  |  |  | IL11         |  | C21orf7 | MAP3K7  |  |  |  |
|  |  |  |  |  | SETBP1       |  | GNG11   | NCK1    |  |  |  |
|  |  |  |  |  | SNAI1        |  | NA      | FHL1    |  |  |  |
|  |  |  |  |  | NA           |  | CCL7    | DKK1    |  |  |  |
|  |  |  |  |  | NA           |  | UPP1    | ICAM1   |  |  |  |
|  |  |  |  |  | NA           |  | FZD4    | BEX4    |  |  |  |
|  |  |  |  |  | SOX6         |  | FCGR1B  | TES     |  |  |  |



|  |  |  |  |  |          |  |         |          |  |  |  |
|--|--|--|--|--|----------|--|---------|----------|--|--|--|
|  |  |  |  |  | SYNE1    |  | DPH3    | MYO6     |  |  |  |
|  |  |  |  |  | STK38L   |  | UBXN2B  | ANTXR1   |  |  |  |
|  |  |  |  |  | NKX3-1   |  | NA      | NUPR1    |  |  |  |
|  |  |  |  |  | CDH6     |  | NA      | TUG1     |  |  |  |
|  |  |  |  |  | NA       |  | N4BP2L2 | TCF4     |  |  |  |
|  |  |  |  |  | PELI1    |  | GRAMD1B | RASA3    |  |  |  |
|  |  |  |  |  | PRDM1    |  | GLI3    | ZMYM6    |  |  |  |
|  |  |  |  |  | PDPN     |  | FGD6    | SS18     |  |  |  |
|  |  |  |  |  | WNT2     |  | FBLN5   | RAB23    |  |  |  |
|  |  |  |  |  | LMO4     |  | KLF10   | CELF2    |  |  |  |
|  |  |  |  |  | C4orf26  |  | CLEC5A  | PRKCI    |  |  |  |
|  |  |  |  |  | OSGIN2   |  | MAMLD1  | B3GNT2   |  |  |  |
|  |  |  |  |  | CACHD1   |  | NA      | KIAA1033 |  |  |  |
|  |  |  |  |  | PRR5L    |  | TCEAL3  | ARF6     |  |  |  |
|  |  |  |  |  | SOX6     |  | SEMA4B  | GOLGA2   |  |  |  |
|  |  |  |  |  | TMEM2    |  | ST3GAL6 | ANKRD12  |  |  |  |
|  |  |  |  |  | DDX10    |  | IRS1    | PARVA    |  |  |  |
|  |  |  |  |  | MTSS1    |  | BNC2    | NID1     |  |  |  |
|  |  |  |  |  | ARHGEF40 |  | GPC1    | CLIP1    |  |  |  |
|  |  |  |  |  | CLDN14   |  | WBP5    | 11-Sep   |  |  |  |
|  |  |  |  |  | JHDM1D   |  | MYOZ1   | EID1     |  |  |  |
|  |  |  |  |  | SLC19A2  |  | NA      | MET      |  |  |  |
|  |  |  |  |  | PLCE1    |  | FPR3    | PTPN12   |  |  |  |
|  |  |  |  |  | PRR9     |  | PDE4DIP | SCARB2   |  |  |  |
|  |  |  |  |  | MEGF9    |  | NA      | C3orf52  |  |  |  |
|  |  |  |  |  | GOPC     |  | PROC    | PROSC    |  |  |  |
|  |  |  |  |  | NA       |  | FNDC3B  | HSP90AA1 |  |  |  |
|  |  |  |  |  | NA       |  | FZD10   | ITGA2    |  |  |  |

|  |  |  |  |  |           |  |         |            |  |  |  |
|--|--|--|--|--|-----------|--|---------|------------|--|--|--|
|  |  |  |  |  | NA        |  | MRO     | HIPK3      |  |  |  |
|  |  |  |  |  | MSC       |  | ADM     | AOX1       |  |  |  |
|  |  |  |  |  | PPP1R14C  |  | NA      | TJP1       |  |  |  |
|  |  |  |  |  | NA        |  | NA      | PRNP       |  |  |  |
|  |  |  |  |  | PKNOX2    |  | MSR1    | MET        |  |  |  |
|  |  |  |  |  | MSX2      |  | NA      | LAPTM5     |  |  |  |
|  |  |  |  |  | SNCAIP    |  | PLXDC2  | ARL6IP5    |  |  |  |
|  |  |  |  |  | SLC35F3   |  | NA      | MET        |  |  |  |
|  |  |  |  |  | ETV6      |  | MBD6    | SS18       |  |  |  |
|  |  |  |  |  | PRR5L     |  | PDLIM7  | NA         |  |  |  |
|  |  |  |  |  | LOC727930 |  | LDLRAD3 | PICALM     |  |  |  |
|  |  |  |  |  | HS3ST3B1  |  | NA      | SQLE       |  |  |  |
|  |  |  |  |  | IL11      |  | SLC22A4 | SEC23A     |  |  |  |
|  |  |  |  |  | MEOX1     |  | SH2D3C  | FKBP1A     |  |  |  |
|  |  |  |  |  | STK38L    |  | KCNK10  | SOAT1      |  |  |  |
|  |  |  |  |  | SNCAIP    |  | FRY     | TNFSF18    |  |  |  |
|  |  |  |  |  | NA        |  | PMEPA1  | NPTX1      |  |  |  |
|  |  |  |  |  | E2F7      |  | MSR1    | PPAP2B     |  |  |  |
|  |  |  |  |  | AUTS2     |  | RIN3    | RAB3B      |  |  |  |
|  |  |  |  |  | FUT4      |  | MOAP1   | BCL2L1     |  |  |  |
|  |  |  |  |  | DLX2      |  | NA      | CREG1      |  |  |  |
|  |  |  |  |  | ETV6      |  | TMEM223 | ITGB3      |  |  |  |
|  |  |  |  |  | TBX3      |  | PECAM1  | RIOK3      |  |  |  |
|  |  |  |  |  | TBX3      |  | PDK4    | PKN2       |  |  |  |
|  |  |  |  |  |           |  | DIO3    | ST6GALNAC4 |  |  |  |
|  |  |  |  |  |           |  | NA      | PDLIM5     |  |  |  |
|  |  |  |  |  |           |  | NA      | IQGAP1     |  |  |  |
|  |  |  |  |  |           |  | TTC6    | IL6ST      |  |  |  |

|  |  |  |  |  |  |  |           |            |  |  |  |
|--|--|--|--|--|--|--|-----------|------------|--|--|--|
|  |  |  |  |  |  |  | FST       | TRIO       |  |  |  |
|  |  |  |  |  |  |  | IL1RL1    | TPR        |  |  |  |
|  |  |  |  |  |  |  | DIO3OS    | DAB2       |  |  |  |
|  |  |  |  |  |  |  | CPE       | ITGB4      |  |  |  |
|  |  |  |  |  |  |  | FAM89A    | GNS        |  |  |  |
|  |  |  |  |  |  |  | CD300LF   | PPP1R2     |  |  |  |
|  |  |  |  |  |  |  | SLC29A1   | LIG4       |  |  |  |
|  |  |  |  |  |  |  | FMNL2     | LYPLA1     |  |  |  |
|  |  |  |  |  |  |  | MTUS1     | PAK2       |  |  |  |
|  |  |  |  |  |  |  | PDLIM7    | CLDN1      |  |  |  |
|  |  |  |  |  |  |  | BNC2      | NA         |  |  |  |
|  |  |  |  |  |  |  | GRB10     | RNF146     |  |  |  |
|  |  |  |  |  |  |  | NA        | EIF5A      |  |  |  |
|  |  |  |  |  |  |  | NA        | FHL1       |  |  |  |
|  |  |  |  |  |  |  | FAM110B   | PTK2       |  |  |  |
|  |  |  |  |  |  |  | LOC646903 | NBN        |  |  |  |
|  |  |  |  |  |  |  | CRTAC1    | CPNE3      |  |  |  |
|  |  |  |  |  |  |  | RGS1      | RAB14      |  |  |  |
|  |  |  |  |  |  |  | BNC2      | PANX1      |  |  |  |
|  |  |  |  |  |  |  | C5orf62   | ARNTL      |  |  |  |
|  |  |  |  |  |  |  | DOCK9     | ST6GALNAC4 |  |  |  |
|  |  |  |  |  |  |  | TLR7      | TWSG1      |  |  |  |
|  |  |  |  |  |  |  | AXL       | NCOA3      |  |  |  |
|  |  |  |  |  |  |  | NMBR      | TSPAN3     |  |  |  |
|  |  |  |  |  |  |  | SDCCAG8   | IGF2BP3    |  |  |  |
|  |  |  |  |  |  |  | ALOX5     | PVR        |  |  |  |
|  |  |  |  |  |  |  | DNM3      | YY1        |  |  |  |
|  |  |  |  |  |  |  | LHFPL2    | PHTF2      |  |  |  |

|  |  |  |  |  |  |           |           |  |  |  |
|--|--|--|--|--|--|-----------|-----------|--|--|--|
|  |  |  |  |  |  | ITGA2     | APLP2     |  |  |  |
|  |  |  |  |  |  | FGF18     | CDH2      |  |  |  |
|  |  |  |  |  |  | IFIT2     | CDK17     |  |  |  |
|  |  |  |  |  |  | TGFBR1    | SLC6A15   |  |  |  |
|  |  |  |  |  |  | NA        | HIST1H2BE |  |  |  |
|  |  |  |  |  |  | BTC       | TBL1XR1   |  |  |  |
|  |  |  |  |  |  | TANC1     | BCAP29    |  |  |  |
|  |  |  |  |  |  | CDK5RAP2  | CSNK1A1   |  |  |  |
|  |  |  |  |  |  | FLRT2     | HDGFRP3   |  |  |  |
|  |  |  |  |  |  | NA        | CBS       |  |  |  |
|  |  |  |  |  |  | FAM27E3   | NRP2      |  |  |  |
|  |  |  |  |  |  | NA        | CD58      |  |  |  |
|  |  |  |  |  |  | NA        | GLUD1     |  |  |  |
|  |  |  |  |  |  | MGC24103  | SLC16A1   |  |  |  |
|  |  |  |  |  |  | TSPAN2    | SPAG9     |  |  |  |
|  |  |  |  |  |  | SLC31A2   | PPFIBP1   |  |  |  |
|  |  |  |  |  |  | SPRY1     | CREBL2    |  |  |  |
|  |  |  |  |  |  | NA        | PSEN1     |  |  |  |
|  |  |  |  |  |  | NA        | RYK       |  |  |  |
|  |  |  |  |  |  | NA        | F2RL1     |  |  |  |
|  |  |  |  |  |  | TNFRSF12A | MAX       |  |  |  |
|  |  |  |  |  |  | SH2D3C    | ARF4      |  |  |  |
|  |  |  |  |  |  | NA        | KIAA1109  |  |  |  |
|  |  |  |  |  |  | RGL3      | B4GALT1   |  |  |  |
|  |  |  |  |  |  | FHL3      | KIAA1033  |  |  |  |
|  |  |  |  |  |  | LOC283033 | ROCK1     |  |  |  |
|  |  |  |  |  |  | LDB2      | HSPG2     |  |  |  |
|  |  |  |  |  |  | NA        | TANK      |  |  |  |

|  |  |  |  |  |  |  |          |          |  |  |  |
|--|--|--|--|--|--|--|----------|----------|--|--|--|
|  |  |  |  |  |  |  | ATP11B   | RAC2     |  |  |  |
|  |  |  |  |  |  |  | DAPK1    | PROSC    |  |  |  |
|  |  |  |  |  |  |  | NA       | VAMP3    |  |  |  |
|  |  |  |  |  |  |  | GAL3ST4  | BCL2L1   |  |  |  |
|  |  |  |  |  |  |  | TMEM163  | PLEC     |  |  |  |
|  |  |  |  |  |  |  | ABCD1    | PXN      |  |  |  |
|  |  |  |  |  |  |  | LTB4R    | TM9SF1   |  |  |  |
|  |  |  |  |  |  |  | SLC6A8   | ECE1     |  |  |  |
|  |  |  |  |  |  |  | NAV1     | EID1     |  |  |  |
|  |  |  |  |  |  |  | ALOX5AP  | SCARB2   |  |  |  |
|  |  |  |  |  |  |  | MASP1    | TRIO     |  |  |  |
|  |  |  |  |  |  |  | TMEM51   | IL8      |  |  |  |
|  |  |  |  |  |  |  | XRCC6BP1 | B4GALT1  |  |  |  |
|  |  |  |  |  |  |  | RNF17    | NBN      |  |  |  |
|  |  |  |  |  |  |  | LAIR1    | SPTBN1   |  |  |  |
|  |  |  |  |  |  |  | NA       | DSTYK    |  |  |  |
|  |  |  |  |  |  |  | NA       | SCAMP1   |  |  |  |
|  |  |  |  |  |  |  | NA       | PLD1     |  |  |  |
|  |  |  |  |  |  |  | ZNF618   | LUC7L3   |  |  |  |
|  |  |  |  |  |  |  | ADAM17   | TPM1     |  |  |  |
|  |  |  |  |  |  |  | GRB10    | PLAA     |  |  |  |
|  |  |  |  |  |  |  | DUSP1    | ARFGEF1  |  |  |  |
|  |  |  |  |  |  |  | DHX58    | KDELR1   |  |  |  |
|  |  |  |  |  |  |  | PHLDA1   | CCPG1    |  |  |  |
|  |  |  |  |  |  |  | NCEH1    | LAPTM4B  |  |  |  |
|  |  |  |  |  |  |  | SERPINE1 | GLUD2    |  |  |  |
|  |  |  |  |  |  |  | ADAMTS2  | SERPINB9 |  |  |  |
|  |  |  |  |  |  |  | SLC22A15 | PTP4A1   |  |  |  |

|  |  |  |  |  |  |              |          |  |  |  |
|--|--|--|--|--|--|--------------|----------|--|--|--|
|  |  |  |  |  |  | NA           | ATP2B1   |  |  |  |
|  |  |  |  |  |  | NA           | IL6ST    |  |  |  |
|  |  |  |  |  |  | NCOR2        | HSPA13   |  |  |  |
|  |  |  |  |  |  | PMEPA1       | PTP4A1   |  |  |  |
|  |  |  |  |  |  | ZNF555       | WDFY3    |  |  |  |
|  |  |  |  |  |  | HOXC10       | NA       |  |  |  |
|  |  |  |  |  |  | PDLIM7       | RIOK3    |  |  |  |
|  |  |  |  |  |  | ARL9         | MDFIC    |  |  |  |
|  |  |  |  |  |  | TSKU         | TMCO3    |  |  |  |
|  |  |  |  |  |  | NA           | IFI27    |  |  |  |
|  |  |  |  |  |  | NA           | POLG     |  |  |  |
|  |  |  |  |  |  | SPATA12      | RALB     |  |  |  |
|  |  |  |  |  |  | CD109        | MTUS1    |  |  |  |
|  |  |  |  |  |  | NA           | NA       |  |  |  |
|  |  |  |  |  |  | C1orf204     | NA       |  |  |  |
|  |  |  |  |  |  | PHLDA1       | SOS2     |  |  |  |
|  |  |  |  |  |  | CHD3         | OGT      |  |  |  |
|  |  |  |  |  |  | IQCG         | NA       |  |  |  |
|  |  |  |  |  |  | LOC100128501 | ITGA6    |  |  |  |
|  |  |  |  |  |  | SLFN5        | HIPK3    |  |  |  |
|  |  |  |  |  |  | NA           | CD58     |  |  |  |
|  |  |  |  |  |  | CCDC40       | GNB1     |  |  |  |
|  |  |  |  |  |  | NA           | IGF2BP3  |  |  |  |
|  |  |  |  |  |  | S100A11      | ATP6V1C1 |  |  |  |
|  |  |  |  |  |  | MAPK8IP3     | MCL1     |  |  |  |
|  |  |  |  |  |  | TM7SF4       | CBFB     |  |  |  |
|  |  |  |  |  |  | AICDA        | SPIN1    |  |  |  |
|  |  |  |  |  |  | PLEKHA7      | SOS2     |  |  |  |

|  |  |  |  |  |  |  |              |          |  |  |  |
|--|--|--|--|--|--|--|--------------|----------|--|--|--|
|  |  |  |  |  |  |  | C1orf106     | LMAN1    |  |  |  |
|  |  |  |  |  |  |  | UNC5C        | PPPDE1   |  |  |  |
|  |  |  |  |  |  |  | MYOZ3        | UBA6     |  |  |  |
|  |  |  |  |  |  |  | ADCY2        | ATP2B4   |  |  |  |
|  |  |  |  |  |  |  | DNASE2       | CDC73    |  |  |  |
|  |  |  |  |  |  |  | NA           | WNK1     |  |  |  |
|  |  |  |  |  |  |  | KCNH3        | ATP2B1   |  |  |  |
|  |  |  |  |  |  |  | IL28RA       | ZNF22    |  |  |  |
|  |  |  |  |  |  |  | JAG1         | IQGAP1   |  |  |  |
|  |  |  |  |  |  |  | NA           | LPP      |  |  |  |
|  |  |  |  |  |  |  | MAP3K2       | SCAMP1   |  |  |  |
|  |  |  |  |  |  |  | COL8A2       | FLI1     |  |  |  |
|  |  |  |  |  |  |  | TPST1        | NEDD4    |  |  |  |
|  |  |  |  |  |  |  | B3GALNT1     | PCDHGA3  |  |  |  |
|  |  |  |  |  |  |  | FGF7         | PPP1R12A |  |  |  |
|  |  |  |  |  |  |  | NA           | IL6ST    |  |  |  |
|  |  |  |  |  |  |  | DKK1         | PON2     |  |  |  |
|  |  |  |  |  |  |  | PRRG4        | UBE2D3   |  |  |  |
|  |  |  |  |  |  |  | NA           | TTC3     |  |  |  |
|  |  |  |  |  |  |  | PPARD        | MEIS3P1  |  |  |  |
|  |  |  |  |  |  |  | BTG1         | LAPTM4B  |  |  |  |
|  |  |  |  |  |  |  | GPR157       | CSDA     |  |  |  |
|  |  |  |  |  |  |  | AREG         | TMOD3    |  |  |  |
|  |  |  |  |  |  |  | FER1L4       | PTPN11   |  |  |  |
|  |  |  |  |  |  |  | UNC5B        | SH3BGRL  |  |  |  |
|  |  |  |  |  |  |  | LOC100240734 | EIF3A    |  |  |  |
|  |  |  |  |  |  |  | RP1L1        | PHACTR2  |  |  |  |
|  |  |  |  |  |  |  | DNM3         | NA       |  |  |  |

|  |  |  |  |  |  |  |         |          |  |  |  |
|--|--|--|--|--|--|--|---------|----------|--|--|--|
|  |  |  |  |  |  |  | NUPR1   | CRK      |  |  |  |
|  |  |  |  |  |  |  | PHLDA1  | UBE2J1   |  |  |  |
|  |  |  |  |  |  |  | PKIA    | RYBP     |  |  |  |
|  |  |  |  |  |  |  | IQCH    | DOCK9    |  |  |  |
|  |  |  |  |  |  |  | WRNIP1  | SDPR     |  |  |  |
|  |  |  |  |  |  |  | MCOLN3  | NCKAP1   |  |  |  |
|  |  |  |  |  |  |  | NA      | CLDN11   |  |  |  |
|  |  |  |  |  |  |  | TTC7A   | CD58     |  |  |  |
|  |  |  |  |  |  |  | RAB23   | NFAT5    |  |  |  |
|  |  |  |  |  |  |  | NA      | NA       |  |  |  |
|  |  |  |  |  |  |  | PHF17   | SHC1     |  |  |  |
|  |  |  |  |  |  |  | EVX1    | UBE2G1   |  |  |  |
|  |  |  |  |  |  |  | FPR1    | MAP4K5   |  |  |  |
|  |  |  |  |  |  |  | AQP9    | RPRD1A   |  |  |  |
|  |  |  |  |  |  |  | JAG1    | TGFB2    |  |  |  |
|  |  |  |  |  |  |  | SIM1    | PPFIA1   |  |  |  |
|  |  |  |  |  |  |  | CACNA1G | SCAMP1   |  |  |  |
|  |  |  |  |  |  |  | NA      | EPAS1    |  |  |  |
|  |  |  |  |  |  |  | NFKBIL2 | NFATC2IP |  |  |  |
|  |  |  |  |  |  |  | NA      | EPB41L5  |  |  |  |
|  |  |  |  |  |  |  | FAM84B  | FGF2     |  |  |  |
|  |  |  |  |  |  |  | FAM7A3  | KLHL7    |  |  |  |
|  |  |  |  |  |  |  | PEX14   | SGPP1    |  |  |  |
|  |  |  |  |  |  |  | MBOAT7  | HERC4    |  |  |  |
|  |  |  |  |  |  |  | GUCA1A  | MICAL2   |  |  |  |
|  |  |  |  |  |  |  | NA      | SP110    |  |  |  |
|  |  |  |  |  |  |  | RUNX1   | PHACTR2  |  |  |  |
|  |  |  |  |  |  |  | PMEPA1  | GSN      |  |  |  |



|  |  |  |  |  |  |  |           |          |  |  |  |
|--|--|--|--|--|--|--|-----------|----------|--|--|--|
|  |  |  |  |  |  |  | BEST1     | CCNA1    |  |  |  |
|  |  |  |  |  |  |  | DUSP1     | SEC14L1  |  |  |  |
|  |  |  |  |  |  |  | SPAM1     | RAB5C    |  |  |  |
|  |  |  |  |  |  |  | ADAMTS18  | RAD21    |  |  |  |
|  |  |  |  |  |  |  | HCFC1R1   | PTGS2    |  |  |  |
|  |  |  |  |  |  |  | PPOX      | MAP3K2   |  |  |  |
|  |  |  |  |  |  |  | STOX2     | UTP3     |  |  |  |
|  |  |  |  |  |  |  | SPATS2L   | GLIPR1   |  |  |  |
|  |  |  |  |  |  |  | TOP1P2    | NAA35    |  |  |  |
|  |  |  |  |  |  |  | ARL4A     | NBR1     |  |  |  |
|  |  |  |  |  |  |  | VSIG1     | TAF9B    |  |  |  |
|  |  |  |  |  |  |  | NA        | NEDD9    |  |  |  |
|  |  |  |  |  |  |  | NA        | TOX4     |  |  |  |
|  |  |  |  |  |  |  | P4HA2     | FLRT2    |  |  |  |
|  |  |  |  |  |  |  | NA        | MBNL1    |  |  |  |
|  |  |  |  |  |  |  | KCP       | LOXL2    |  |  |  |
|  |  |  |  |  |  |  | TRIM55    | EPB41L3  |  |  |  |
|  |  |  |  |  |  |  | LOC283050 | NFIB     |  |  |  |
|  |  |  |  |  |  |  | RHOB      | TPP1     |  |  |  |
|  |  |  |  |  |  |  | ABHD2     | LIMS1    |  |  |  |
|  |  |  |  |  |  |  | NA        | PVR      |  |  |  |
|  |  |  |  |  |  |  | DISP1     | CALM1    |  |  |  |
|  |  |  |  |  |  |  | MMP14     | TMX1     |  |  |  |
|  |  |  |  |  |  |  | NA        | SIRPA    |  |  |  |
|  |  |  |  |  |  |  | MMP7      | DCTD     |  |  |  |
|  |  |  |  |  |  |  | ABCG2     | CHP      |  |  |  |
|  |  |  |  |  |  |  | ABHD8     | NF1      |  |  |  |
|  |  |  |  |  |  |  | ARL5A     | PAFAH1B1 |  |  |  |

|  |  |  |  |  |  |  |           |         |  |  |  |
|--|--|--|--|--|--|--|-----------|---------|--|--|--|
|  |  |  |  |  |  |  | G0S2      | PRKAR1A |  |  |  |
|  |  |  |  |  |  |  | CMTM1     | ACBD3   |  |  |  |
|  |  |  |  |  |  |  | FFAR1     | TFDP1   |  |  |  |
|  |  |  |  |  |  |  | MYH8      | FEM1B   |  |  |  |
|  |  |  |  |  |  |  | TES       | HHLA3   |  |  |  |
|  |  |  |  |  |  |  | NA        | SYNM    |  |  |  |
|  |  |  |  |  |  |  | SEMA6B    | YIPF5   |  |  |  |
|  |  |  |  |  |  |  | CES1      | NFYA    |  |  |  |
|  |  |  |  |  |  |  | NA        | MGEA5   |  |  |  |
|  |  |  |  |  |  |  | SLC10A2   | PHACTR2 |  |  |  |
|  |  |  |  |  |  |  | KLHL6     | LYN     |  |  |  |
|  |  |  |  |  |  |  | LAPTM5    | KITLG   |  |  |  |
|  |  |  |  |  |  |  | NA        | CEACAM1 |  |  |  |
|  |  |  |  |  |  |  | NA        | SNAP23  |  |  |  |
|  |  |  |  |  |  |  | CLDN12    | TPP2    |  |  |  |
|  |  |  |  |  |  |  | GPR26     | NRAS    |  |  |  |
|  |  |  |  |  |  |  | NA        | ASF1A   |  |  |  |
|  |  |  |  |  |  |  | PRRG4     | XPO7    |  |  |  |
|  |  |  |  |  |  |  | LOC151438 | CDC5L   |  |  |  |
|  |  |  |  |  |  |  | NA        | RASA1   |  |  |  |
|  |  |  |  |  |  |  | C1orf150  | NA      |  |  |  |
|  |  |  |  |  |  |  | PEX2      | 07-Mar  |  |  |  |
|  |  |  |  |  |  |  | MAP3K2    | LMAN1   |  |  |  |
|  |  |  |  |  |  |  | NA        | IL13RA1 |  |  |  |
|  |  |  |  |  |  |  | NA        | ITPR3   |  |  |  |
|  |  |  |  |  |  |  | NA        | GLG1    |  |  |  |
|  |  |  |  |  |  |  | FAM113B   | KPNA1   |  |  |  |
|  |  |  |  |  |  |  | FABP6     | NA      |  |  |  |

|  |  |  |  |  |  |          |         |  |  |  |
|--|--|--|--|--|--|----------|---------|--|--|--|
|  |  |  |  |  |  | NA       | ATP13A3 |  |  |  |
|  |  |  |  |  |  | NA       | EXOC5   |  |  |  |
|  |  |  |  |  |  | SNTB1    | LIPG    |  |  |  |
|  |  |  |  |  |  | LIMS1    | NA      |  |  |  |
|  |  |  |  |  |  | SNTB1    | ABCF2   |  |  |  |
|  |  |  |  |  |  | KLF15    | IL1RL1  |  |  |  |
|  |  |  |  |  |  | SOAT1    | ASNS    |  |  |  |
|  |  |  |  |  |  | MTUS1    | HSP90B1 |  |  |  |
|  |  |  |  |  |  | SH2D1B   | ATG5    |  |  |  |
|  |  |  |  |  |  | RNASEH2B | ELL2    |  |  |  |
|  |  |  |  |  |  | MET      | WAC     |  |  |  |
|  |  |  |  |  |  | MAP3K2   | ATP6AP2 |  |  |  |
|  |  |  |  |  |  | SLC39A12 | FAIM    |  |  |  |
|  |  |  |  |  |  | NA       | ABI1    |  |  |  |
|  |  |  |  |  |  | KRT13    | ADH5    |  |  |  |
|  |  |  |  |  |  | RAB3B    | PDE4B   |  |  |  |
|  |  |  |  |  |  | MAN2A2   | PWP1    |  |  |  |
|  |  |  |  |  |  | CNBD1    | ASPH    |  |  |  |
|  |  |  |  |  |  | VASH1    | DNAJC10 |  |  |  |
|  |  |  |  |  |  | SEC22C   | SELT    |  |  |  |
|  |  |  |  |  |  | UBQLNL   | 02-Sep  |  |  |  |
|  |  |  |  |  |  | SUCLG1   | GLUL    |  |  |  |
|  |  |  |  |  |  | JAG1     | ENO1    |  |  |  |
|  |  |  |  |  |  | ZFYVE19  | PTPRF   |  |  |  |
|  |  |  |  |  |  | RIF1     | CAPN7   |  |  |  |
|  |  |  |  |  |  | RHOBTB2  | RBM9    |  |  |  |
|  |  |  |  |  |  | UNC80    | NA      |  |  |  |
|  |  |  |  |  |  | ARMC8    | C5orf28 |  |  |  |

|  |  |  |  |  |  |  |          |           |  |  |  |
|--|--|--|--|--|--|--|----------|-----------|--|--|--|
|  |  |  |  |  |  |  | CADM2    | EIF4G1    |  |  |  |
|  |  |  |  |  |  |  | VASH1    | HSF1      |  |  |  |
|  |  |  |  |  |  |  | C3       | HSPH1     |  |  |  |
|  |  |  |  |  |  |  | SLC8A1   | NONO      |  |  |  |
|  |  |  |  |  |  |  | ABCC3    | IKBKB     |  |  |  |
|  |  |  |  |  |  |  | DPY19L1  | NEDD9     |  |  |  |
|  |  |  |  |  |  |  | TSPAN5   | TNFRSF10C |  |  |  |
|  |  |  |  |  |  |  | MCOLN3   | TMEM41B   |  |  |  |
|  |  |  |  |  |  |  | TMEM163  | PTPRO     |  |  |  |
|  |  |  |  |  |  |  | NA       | GNB1      |  |  |  |
|  |  |  |  |  |  |  | AAA1     | KPNA4     |  |  |  |
|  |  |  |  |  |  |  | ABHD2    | SPTLC1    |  |  |  |
|  |  |  |  |  |  |  | NA       | KIAA1109  |  |  |  |
|  |  |  |  |  |  |  | SLC26A10 | NRCAM     |  |  |  |
|  |  |  |  |  |  |  | NA       | RAB5A     |  |  |  |
|  |  |  |  |  |  |  | JAG1     | TCF25     |  |  |  |
|  |  |  |  |  |  |  | SMAD7    | NUCB1     |  |  |  |
|  |  |  |  |  |  |  | NA       | RCN2      |  |  |  |
|  |  |  |  |  |  |  | ABCC3    | ZNF148    |  |  |  |
|  |  |  |  |  |  |  | NA       | LAMP1     |  |  |  |
|  |  |  |  |  |  |  | NA       | NA        |  |  |  |
|  |  |  |  |  |  |  | HAMP     | SMC3      |  |  |  |
|  |  |  |  |  |  |  | NA       | SOS1      |  |  |  |
|  |  |  |  |  |  |  | NA       | GTF2I     |  |  |  |
|  |  |  |  |  |  |  | MERTK    | RNFT1     |  |  |  |
|  |  |  |  |  |  |  | TRIM62   | IL1A      |  |  |  |
|  |  |  |  |  |  |  | TP53I11  | ITGA4     |  |  |  |
|  |  |  |  |  |  |  | NA       | SLC16A3   |  |  |  |

|  |  |  |  |  |  |  |            |         |  |  |  |
|--|--|--|--|--|--|--|------------|---------|--|--|--|
|  |  |  |  |  |  |  | CLDND2     | NA      |  |  |  |
|  |  |  |  |  |  |  | SLC11A1    | RBM25   |  |  |  |
|  |  |  |  |  |  |  | SLC16A10   | USP34   |  |  |  |
|  |  |  |  |  |  |  | NA         | ANXA4   |  |  |  |
|  |  |  |  |  |  |  | AMPH       | UBXN4   |  |  |  |
|  |  |  |  |  |  |  | SLC6A8     | ETS1    |  |  |  |
|  |  |  |  |  |  |  | ZNF687     | DIAPH1  |  |  |  |
|  |  |  |  |  |  |  | NA         | SYPL1   |  |  |  |
|  |  |  |  |  |  |  | CNTNAP3B   | UBXN4   |  |  |  |
|  |  |  |  |  |  |  | TPM1       | EXTL3   |  |  |  |
|  |  |  |  |  |  |  | GPX7       | CALR    |  |  |  |
|  |  |  |  |  |  |  | FNDC3B     | MGAT2   |  |  |  |
|  |  |  |  |  |  |  | SLC44A2    | CREB1   |  |  |  |
|  |  |  |  |  |  |  | NCRNA00113 | G3BP2   |  |  |  |
|  |  |  |  |  |  |  | ABHD2      | SLC4A7  |  |  |  |
|  |  |  |  |  |  |  | SLIT3      | KLHL9   |  |  |  |
|  |  |  |  |  |  |  | MTHFD1L    | ELF1    |  |  |  |
|  |  |  |  |  |  |  | NOS3       | HDGFRP3 |  |  |  |
|  |  |  |  |  |  |  | LOC286437  | YWHAB   |  |  |  |
|  |  |  |  |  |  |  | SLC24A2    | PPFIA1  |  |  |  |
|  |  |  |  |  |  |  | RNF6       | SMARCA2 |  |  |  |
|  |  |  |  |  |  |  | SERINC2    | CCDC6   |  |  |  |
|  |  |  |  |  |  |  | PSME4      | SELE    |  |  |  |
|  |  |  |  |  |  |  | C8orf55    | MFSD6   |  |  |  |
|  |  |  |  |  |  |  | NA         | SORBS3  |  |  |  |
|  |  |  |  |  |  |  | NA         | CYP51A1 |  |  |  |
|  |  |  |  |  |  |  | NA         | KITLG   |  |  |  |
|  |  |  |  |  |  |  | MRO        | CD44    |  |  |  |

|  |  |  |  |  |  |           |           |  |  |  |
|--|--|--|--|--|--|-----------|-----------|--|--|--|
|  |  |  |  |  |  | NA        | RAPGEF2   |  |  |  |
|  |  |  |  |  |  | NA        | PIGC      |  |  |  |
|  |  |  |  |  |  | NA        | TOX4      |  |  |  |
|  |  |  |  |  |  | NA        | EDEM3     |  |  |  |
|  |  |  |  |  |  | TSPAN3    | ATP6V1A   |  |  |  |
|  |  |  |  |  |  | CADM1     | ZFR       |  |  |  |
|  |  |  |  |  |  | SLC16A3   | USP10     |  |  |  |
|  |  |  |  |  |  | NA        | CPD       |  |  |  |
|  |  |  |  |  |  | LOC154822 | WTAP      |  |  |  |
|  |  |  |  |  |  | TFAP2C    | TPR       |  |  |  |
|  |  |  |  |  |  | NA        | GDE1      |  |  |  |
|  |  |  |  |  |  | FPR3      | DHX9      |  |  |  |
|  |  |  |  |  |  | NA        | UTRN      |  |  |  |
|  |  |  |  |  |  | FAM40B    | CDC27     |  |  |  |
|  |  |  |  |  |  | IL3RA     | GFRA1     |  |  |  |
|  |  |  |  |  |  | SDCCAG8   | TWF1      |  |  |  |
|  |  |  |  |  |  | NA        | STIP1     |  |  |  |
|  |  |  |  |  |  | NA        | PSAT1     |  |  |  |
|  |  |  |  |  |  | STOX2     | GMFB      |  |  |  |
|  |  |  |  |  |  | IFIT3     | TNFRSF10D |  |  |  |
|  |  |  |  |  |  | SH3GL2    | RERE      |  |  |  |
|  |  |  |  |  |  | NA        | COMT      |  |  |  |
|  |  |  |  |  |  | GLCCI1    | NUP50     |  |  |  |
|  |  |  |  |  |  | NA        | CD164     |  |  |  |
|  |  |  |  |  |  | KRTAP11-1 | TGOLN2    |  |  |  |
|  |  |  |  |  |  | NA        | WIZ       |  |  |  |
|  |  |  |  |  |  | C1orf91   | ENC1      |  |  |  |
|  |  |  |  |  |  | EPAS1     | M6PR      |  |  |  |

|  |  |  |  |  |  |          |          |  |  |  |
|--|--|--|--|--|--|----------|----------|--|--|--|
|  |  |  |  |  |  | OR10D3   | S100P    |  |  |  |
|  |  |  |  |  |  | ASIP     | PGRMC1   |  |  |  |
|  |  |  |  |  |  | TDRD9    | RAD23A   |  |  |  |
|  |  |  |  |  |  | NA       | NUDT4    |  |  |  |
|  |  |  |  |  |  | YPEL2    | PAFAH1B1 |  |  |  |
|  |  |  |  |  |  | MIA3     | LIN7C    |  |  |  |
|  |  |  |  |  |  | NA       | GPD2     |  |  |  |
|  |  |  |  |  |  | BTBD19   | IL13RA1  |  |  |  |
|  |  |  |  |  |  | GPR84    | RABEP1   |  |  |  |
|  |  |  |  |  |  | NA       | VDAC1    |  |  |  |
|  |  |  |  |  |  | PHC2     | ANXA4    |  |  |  |
|  |  |  |  |  |  | BNC2     | MED20    |  |  |  |
|  |  |  |  |  |  | MGST1    | DMD      |  |  |  |
|  |  |  |  |  |  | NA       | EML4     |  |  |  |
|  |  |  |  |  |  | NA       | SPRY2    |  |  |  |
|  |  |  |  |  |  | NA       | SLC11A2  |  |  |  |
|  |  |  |  |  |  | NA       | TRIO     |  |  |  |
|  |  |  |  |  |  | MFAP3L   | UTRN     |  |  |  |
|  |  |  |  |  |  | NA       | SLC33A1  |  |  |  |
|  |  |  |  |  |  | NR4A2    | SMAD5    |  |  |  |
|  |  |  |  |  |  | NA       | NA       |  |  |  |
|  |  |  |  |  |  | GLUL     | BCLAF1   |  |  |  |
|  |  |  |  |  |  | TLE3     | NONO     |  |  |  |
|  |  |  |  |  |  | TLE3     | BUB3     |  |  |  |
|  |  |  |  |  |  | NA       | NUS1P3   |  |  |  |
|  |  |  |  |  |  | MAPKAPK2 | SENP3    |  |  |  |
|  |  |  |  |  |  | DDA1     | DUSP3    |  |  |  |
|  |  |  |  |  |  | NA       | ZWILCH   |  |  |  |

|  |  |  |  |  |  |  |         |           |  |  |  |
|--|--|--|--|--|--|--|---------|-----------|--|--|--|
|  |  |  |  |  |  |  | TPD52L1 | PSG6      |  |  |  |
|  |  |  |  |  |  |  | NA      | MAPK1     |  |  |  |
|  |  |  |  |  |  |  | FOXD4   | MANEA     |  |  |  |
|  |  |  |  |  |  |  | GNB4    | PPPDE1    |  |  |  |
|  |  |  |  |  |  |  | LSR     | SPAST     |  |  |  |
|  |  |  |  |  |  |  | SMURF1  | SNRNP27   |  |  |  |
|  |  |  |  |  |  |  | C2orf40 | RNF115    |  |  |  |
|  |  |  |  |  |  |  | FKRP    | PSPH      |  |  |  |
|  |  |  |  |  |  |  | NA      | TOR1AIP1  |  |  |  |
|  |  |  |  |  |  |  | CLCN4   | PTPN11    |  |  |  |
|  |  |  |  |  |  |  | OSM     | SMC3      |  |  |  |
|  |  |  |  |  |  |  | SLC8A1  | MED6      |  |  |  |
|  |  |  |  |  |  |  | HECW1   | MAX       |  |  |  |
|  |  |  |  |  |  |  | NA      | EPRS      |  |  |  |
|  |  |  |  |  |  |  | DIRAS2  | VPS41     |  |  |  |
|  |  |  |  |  |  |  | CLVS1   | USP46     |  |  |  |
|  |  |  |  |  |  |  | MME     | SMEK1     |  |  |  |
|  |  |  |  |  |  |  | NA      | YWHAE     |  |  |  |
|  |  |  |  |  |  |  | COL22A1 | FKBP1A    |  |  |  |
|  |  |  |  |  |  |  | NA      | SCYL2     |  |  |  |
|  |  |  |  |  |  |  | ZNF549  | SNAP23    |  |  |  |
|  |  |  |  |  |  |  | 01-Dec  | CTH       |  |  |  |
|  |  |  |  |  |  |  | FRY     | HIPK2     |  |  |  |
|  |  |  |  |  |  |  | SKIL    | TOR1AIP1  |  |  |  |
|  |  |  |  |  |  |  | SS18    | ACLY      |  |  |  |
|  |  |  |  |  |  |  | DGCR6L  | TNFRSF10B |  |  |  |
|  |  |  |  |  |  |  | RWDD2A  | PRKACB    |  |  |  |
|  |  |  |  |  |  |  | MBD4    | CD164     |  |  |  |



|  |  |  |  |  |  |  |           |          |  |  |  |
|--|--|--|--|--|--|--|-----------|----------|--|--|--|
|  |  |  |  |  |  |  | MBD4      | CREB1    |  |  |  |
|  |  |  |  |  |  |  | NA        | GBX2     |  |  |  |
|  |  |  |  |  |  |  | RUNX1T1   | MT1E     |  |  |  |
|  |  |  |  |  |  |  | PXN       | FBXW11   |  |  |  |
|  |  |  |  |  |  |  | LOC283104 | MT1X     |  |  |  |
|  |  |  |  |  |  |  | ECE1      | PRKCI    |  |  |  |
|  |  |  |  |  |  |  | FZD7      | CEACAM1  |  |  |  |
|  |  |  |  |  |  |  | RNASE4    | DDX18    |  |  |  |
|  |  |  |  |  |  |  | PRIM2     | G3BP2    |  |  |  |
|  |  |  |  |  |  |  | BTBD11    | TRRAP    |  |  |  |
|  |  |  |  |  |  |  | TLX3      | CLPTM1   |  |  |  |
|  |  |  |  |  |  |  | NA        | GRB2     |  |  |  |
|  |  |  |  |  |  |  | NA        | PAPOLA   |  |  |  |
|  |  |  |  |  |  |  | ABHD2     | PREPL    |  |  |  |
|  |  |  |  |  |  |  | HP        | FNDC3A   |  |  |  |
|  |  |  |  |  |  |  | FAM40B    | MT1M     |  |  |  |
|  |  |  |  |  |  |  | MTHFD1L   | NFYB     |  |  |  |
|  |  |  |  |  |  |  | TLR7      | NA       |  |  |  |
|  |  |  |  |  |  |  | ZNF589    | POT1     |  |  |  |
|  |  |  |  |  |  |  | TRIO      | PRPF4    |  |  |  |
|  |  |  |  |  |  |  | PRPF40B   | GGA3     |  |  |  |
|  |  |  |  |  |  |  | SOX18     | SNAPC3   |  |  |  |
|  |  |  |  |  |  |  | DDHD1     | SRSF2IP  |  |  |  |
|  |  |  |  |  |  |  | CLPS      | ABCB1    |  |  |  |
|  |  |  |  |  |  |  | ERMP1     | CFLAR    |  |  |  |
|  |  |  |  |  |  |  | NA        | KIAA0494 |  |  |  |
|  |  |  |  |  |  |  | SLC16A8   | C1orf144 |  |  |  |
|  |  |  |  |  |  |  | CDKN1A    | PTMS     |  |  |  |

|  |  |  |  |  |  |  |          |          |  |  |  |
|--|--|--|--|--|--|--|----------|----------|--|--|--|
|  |  |  |  |  |  |  | AK7      | CBFB     |  |  |  |
|  |  |  |  |  |  |  | STX6     | KPNA6    |  |  |  |
|  |  |  |  |  |  |  | PHYHD1   | C6orf106 |  |  |  |
|  |  |  |  |  |  |  | PCBP3    | RPE      |  |  |  |
|  |  |  |  |  |  |  | OLFML3   | MAGT1    |  |  |  |
|  |  |  |  |  |  |  | NA       | SLC26A2  |  |  |  |
|  |  |  |  |  |  |  | ZBTB16   | ABCC1    |  |  |  |
|  |  |  |  |  |  |  | C9orf117 | TPD52    |  |  |  |
|  |  |  |  |  |  |  | TPD52L1  | LRP8     |  |  |  |
|  |  |  |  |  |  |  | SOX4     | SYNCRIP  |  |  |  |
|  |  |  |  |  |  |  | NA       | PCBD1    |  |  |  |
|  |  |  |  |  |  |  | PCDHGB8P | PVR      |  |  |  |
|  |  |  |  |  |  |  | EYA2     | MAPKAPK2 |  |  |  |
|  |  |  |  |  |  |  | SNTB1    | SLC1A4   |  |  |  |
|  |  |  |  |  |  |  | TMTC1    | SMARCC1  |  |  |  |
|  |  |  |  |  |  |  | EN1      | SLC7A1   |  |  |  |
|  |  |  |  |  |  |  | NA       | METAP2   |  |  |  |
|  |  |  |  |  |  |  | NA       | ANKFY1   |  |  |  |
|  |  |  |  |  |  |  | MAP3K2   | EPRS     |  |  |  |
|  |  |  |  |  |  |  | ELL2     | CLCN3    |  |  |  |
|  |  |  |  |  |  |  | SLC45A3  | SNX4     |  |  |  |
|  |  |  |  |  |  |  | HRG      | MBTPS1   |  |  |  |
|  |  |  |  |  |  |  | DENND5B  | CSNK1A1  |  |  |  |
|  |  |  |  |  |  |  | MDFIC    | ALG13    |  |  |  |
|  |  |  |  |  |  |  | TGM2     | GPR56    |  |  |  |
|  |  |  |  |  |  |  | NA       | FOXJ3    |  |  |  |
|  |  |  |  |  |  |  | GPD2     | MFNG     |  |  |  |
|  |  |  |  |  |  |  | NA       | TRIO     |  |  |  |

|  |  |  |  |  |  |  |           |         |  |  |  |
|--|--|--|--|--|--|--|-----------|---------|--|--|--|
|  |  |  |  |  |  |  | NA        | AP1S1   |  |  |  |
|  |  |  |  |  |  |  | MFGE8     | DCTN4   |  |  |  |
|  |  |  |  |  |  |  | NA        | EDEM3   |  |  |  |
|  |  |  |  |  |  |  | HBEGF     | HSP90B1 |  |  |  |
|  |  |  |  |  |  |  | AKR1C2    | TSN     |  |  |  |
|  |  |  |  |  |  |  | GLDN      | SLC7A1  |  |  |  |
|  |  |  |  |  |  |  | OCIAD2    | TRA2B   |  |  |  |
|  |  |  |  |  |  |  | LONRF3    | RIPK1   |  |  |  |
|  |  |  |  |  |  |  | ELL2      | SERINC3 |  |  |  |
|  |  |  |  |  |  |  | MAP9      | GM2A    |  |  |  |
|  |  |  |  |  |  |  | NA        | TAGLN2  |  |  |  |
|  |  |  |  |  |  |  | NA        | SMG1    |  |  |  |
|  |  |  |  |  |  |  | LOC283454 | OSBP    |  |  |  |
|  |  |  |  |  |  |  | NA        | QPCT    |  |  |  |
|  |  |  |  |  |  |  | PSME4     | MAN1A1  |  |  |  |
|  |  |  |  |  |  |  | NA        | SH3GLB2 |  |  |  |
|  |  |  |  |  |  |  | NTRK2     | FUCA1   |  |  |  |
|  |  |  |  |  |  |  | SLC6A12   | APBA1   |  |  |  |
|  |  |  |  |  |  |  | IL18RAP   | GSPT1   |  |  |  |
|  |  |  |  |  |  |  | PLEKHA5   | MCM4    |  |  |  |
|  |  |  |  |  |  |  | NA        | H2AFY   |  |  |  |
|  |  |  |  |  |  |  | NT5DC4    | RANBP2  |  |  |  |
|  |  |  |  |  |  |  | CPD       | HADHA   |  |  |  |
|  |  |  |  |  |  |  | NA        | PTPRF   |  |  |  |
|  |  |  |  |  |  |  | SLC8A1    | TLR4    |  |  |  |
|  |  |  |  |  |  |  | ANKRD29   | DAPK3   |  |  |  |
|  |  |  |  |  |  |  | PCMTD1    | ELP3    |  |  |  |
|  |  |  |  |  |  |  | FAM178B   | NA      |  |  |  |

|  |  |  |  |  |  |           |         |  |  |  |
|--|--|--|--|--|--|-----------|---------|--|--|--|
|  |  |  |  |  |  | ZFP36L1   | SETD8   |  |  |  |
|  |  |  |  |  |  | SLFN5     | ARFIP1  |  |  |  |
|  |  |  |  |  |  | SMURF2    | ZFY     |  |  |  |
|  |  |  |  |  |  | SIGLEC8   | C19orf6 |  |  |  |
|  |  |  |  |  |  | LOC284454 | TGFBR2  |  |  |  |
|  |  |  |  |  |  | LOC401097 | TANK    |  |  |  |
|  |  |  |  |  |  | C17orf91  | BSG     |  |  |  |
|  |  |  |  |  |  | NLRP12    | NA      |  |  |  |
|  |  |  |  |  |  | USP53     | NETO2   |  |  |  |
|  |  |  |  |  |  | AZI2      | SERINC3 |  |  |  |
|  |  |  |  |  |  | NA        | ENG     |  |  |  |
|  |  |  |  |  |  | C19orf59  | MAPK14  |  |  |  |
|  |  |  |  |  |  | NPR1      | ADD1    |  |  |  |
|  |  |  |  |  |  | IFIT3     | FAS     |  |  |  |
|  |  |  |  |  |  | NA        | CD46    |  |  |  |
|  |  |  |  |  |  | FMNL3     | ARF3    |  |  |  |
|  |  |  |  |  |  | NA        | HMGGA1  |  |  |  |
|  |  |  |  |  |  | SLC11A1   | AGFG1   |  |  |  |
|  |  |  |  |  |  | NA        | HNRNPC  |  |  |  |
|  |  |  |  |  |  | SLC41A1   | MYO9B   |  |  |  |
|  |  |  |  |  |  | KCNA3     | YAP1    |  |  |  |
|  |  |  |  |  |  | CACNA2D1  | DDX3X   |  |  |  |
|  |  |  |  |  |  | ARID3B    | PCK2    |  |  |  |
|  |  |  |  |  |  | GAPT      | PRPF40A |  |  |  |
|  |  |  |  |  |  | ALOX5     | SEL1L   |  |  |  |
|  |  |  |  |  |  | BLOC1S2   | RAB6A   |  |  |  |
|  |  |  |  |  |  | IGF2BP1   | GLIPR1  |  |  |  |
|  |  |  |  |  |  | NA        | ACLY    |  |  |  |

|  |  |  |  |  |  |  |             |           |  |  |  |
|--|--|--|--|--|--|--|-------------|-----------|--|--|--|
|  |  |  |  |  |  |  | NA          | NOLC1     |  |  |  |
|  |  |  |  |  |  |  | CADM1       | MAPRE1    |  |  |  |
|  |  |  |  |  |  |  | NA          | CDV3      |  |  |  |
|  |  |  |  |  |  |  | PCNX        | SKAP2     |  |  |  |
|  |  |  |  |  |  |  | NA          | ACTR2     |  |  |  |
|  |  |  |  |  |  |  | SCD         | ZC3H15    |  |  |  |
|  |  |  |  |  |  |  | NA          | NA        |  |  |  |
|  |  |  |  |  |  |  | NA          | MAPK1     |  |  |  |
|  |  |  |  |  |  |  | CCDC157     | ZMYND11   |  |  |  |
|  |  |  |  |  |  |  | NA          | ITPR2     |  |  |  |
|  |  |  |  |  |  |  | BLMH        | DAZAP2    |  |  |  |
|  |  |  |  |  |  |  | NA          | EDC3      |  |  |  |
|  |  |  |  |  |  |  | SLC5A7      | PCYOX1    |  |  |  |
|  |  |  |  |  |  |  | MFI2        | MAP2K2    |  |  |  |
|  |  |  |  |  |  |  | NA          | TFG       |  |  |  |
|  |  |  |  |  |  |  | FKBP15      | KCTD20    |  |  |  |
|  |  |  |  |  |  |  | CPD         | C19orf6   |  |  |  |
|  |  |  |  |  |  |  | TRMT1       | DOCK9     |  |  |  |
|  |  |  |  |  |  |  | NA          | MTMR1     |  |  |  |
|  |  |  |  |  |  |  | FCGR3B      | CAPRIN1   |  |  |  |
|  |  |  |  |  |  |  | NA          | SMARCC1   |  |  |  |
|  |  |  |  |  |  |  | NA          | PIP5K1A   |  |  |  |
|  |  |  |  |  |  |  | TEX14       | HNRNPH1   |  |  |  |
|  |  |  |  |  |  |  | NA          | BCLAF1    |  |  |  |
|  |  |  |  |  |  |  | OK/SW-CL.36 | C14orf101 |  |  |  |
|  |  |  |  |  |  |  | ABCC3       | TMED2     |  |  |  |
|  |  |  |  |  |  |  | COX15       | CD46      |  |  |  |
|  |  |  |  |  |  |  | MEX3D       | CLN5      |  |  |  |

|  |  |  |  |  |  |          |          |  |  |  |
|--|--|--|--|--|--|----------|----------|--|--|--|
|  |  |  |  |  |  | MERTK    | KIAA0494 |  |  |  |
|  |  |  |  |  |  | LTA4H    | SEL1L    |  |  |  |
|  |  |  |  |  |  | NA       | GRLF1    |  |  |  |
|  |  |  |  |  |  | AKR1C1   | MPZL1    |  |  |  |
|  |  |  |  |  |  | CNIH4    | ROD1     |  |  |  |
|  |  |  |  |  |  | NPTXR    | SH3BP4   |  |  |  |
|  |  |  |  |  |  | NA       | CFLAR    |  |  |  |
|  |  |  |  |  |  | PPARD    | SKAP2    |  |  |  |
|  |  |  |  |  |  | TP53INP2 | BCLAF1   |  |  |  |
|  |  |  |  |  |  | C12orf59 | ACTR2    |  |  |  |
|  |  |  |  |  |  | KLHL29   | AP2B1    |  |  |  |
|  |  |  |  |  |  | LARGE    | PRKDC    |  |  |  |
|  |  |  |  |  |  | NA       | SEC23IP  |  |  |  |
|  |  |  |  |  |  | MMP2     | RRN3P1   |  |  |  |
|  |  |  |  |  |  | NA       | NUMA1    |  |  |  |
|  |  |  |  |  |  | NA       | GDI2     |  |  |  |
|  |  |  |  |  |  | NA       | ME2      |  |  |  |
|  |  |  |  |  |  | KCNC3    | CYB5R4   |  |  |  |
|  |  |  |  |  |  | NAPSB    | DCLRE1C  |  |  |  |
|  |  |  |  |  |  | ACADVL   | NAA15    |  |  |  |
|  |  |  |  |  |  | NA       | NNT      |  |  |  |
|  |  |  |  |  |  | C1orf126 | TRIM27   |  |  |  |
|  |  |  |  |  |  | NA       | DLG1     |  |  |  |
|  |  |  |  |  |  | NA       | IGF2R    |  |  |  |
|  |  |  |  |  |  | CYP19A1  | GTF2F1   |  |  |  |
|  |  |  |  |  |  | NA       | TUBGCP2  |  |  |  |
|  |  |  |  |  |  | TNNT2    | ERC1     |  |  |  |
|  |  |  |  |  |  | NRK      | COPA     |  |  |  |

|  |  |  |  |  |  |  |           |          |  |  |  |
|--|--|--|--|--|--|--|-----------|----------|--|--|--|
|  |  |  |  |  |  |  | MSTN      | NA       |  |  |  |
|  |  |  |  |  |  |  | CYLD      | DLAT     |  |  |  |
|  |  |  |  |  |  |  | RGS8      | DHX9     |  |  |  |
|  |  |  |  |  |  |  | NA        | SCP2     |  |  |  |
|  |  |  |  |  |  |  | HDGFRP3   | MAGOH    |  |  |  |
|  |  |  |  |  |  |  | SLC16A10  | SRP72    |  |  |  |
|  |  |  |  |  |  |  | HS3ST5    | TLE4     |  |  |  |
|  |  |  |  |  |  |  | LOC255167 | MAT2A    |  |  |  |
|  |  |  |  |  |  |  | KCNIP2    | UBE4B    |  |  |  |
|  |  |  |  |  |  |  | IL17RB    | FAM120A  |  |  |  |
|  |  |  |  |  |  |  | ANG       | SOCS2    |  |  |  |
|  |  |  |  |  |  |  | FLJ13197  | CANX     |  |  |  |
|  |  |  |  |  |  |  | TPSB2     | SSR1     |  |  |  |
|  |  |  |  |  |  |  | NA        | FAS      |  |  |  |
|  |  |  |  |  |  |  | FURIN     | AASDHPPT |  |  |  |
|  |  |  |  |  |  |  | ABCC3     | NA       |  |  |  |
|  |  |  |  |  |  |  | TGFBR1    | API5     |  |  |  |
|  |  |  |  |  |  |  | CLDN11    | ROD1     |  |  |  |
|  |  |  |  |  |  |  | NEK6      | SLC30A1  |  |  |  |
|  |  |  |  |  |  |  | SLC11A1   | GGA2     |  |  |  |
|  |  |  |  |  |  |  | CD58      | VAC14    |  |  |  |
|  |  |  |  |  |  |  | PYROXD1   | KPNA3    |  |  |  |
|  |  |  |  |  |  |  | ALK       | TTC37    |  |  |  |
|  |  |  |  |  |  |  | GOLT1A    | SSB      |  |  |  |
|  |  |  |  |  |  |  | CNKSR3    | C1orf103 |  |  |  |
|  |  |  |  |  |  |  | CHD9      | KIAA0494 |  |  |  |
|  |  |  |  |  |  |  | RHOH      | ARF1     |  |  |  |
|  |  |  |  |  |  |  | L3MBTL4   | AP1S1    |  |  |  |

|  |  |  |  |  |  |  |         |           |  |  |  |
|--|--|--|--|--|--|--|---------|-----------|--|--|--|
|  |  |  |  |  |  |  | GLDN    | 06-Mar    |  |  |  |
|  |  |  |  |  |  |  | NA      | RELN      |  |  |  |
|  |  |  |  |  |  |  | HAL     | ARHGDIA   |  |  |  |
|  |  |  |  |  |  |  | NA      | USP46     |  |  |  |
|  |  |  |  |  |  |  | S100A8  | TNFRSF10B |  |  |  |
|  |  |  |  |  |  |  | NLRC4   | PVR       |  |  |  |
|  |  |  |  |  |  |  | PTGER3  | C20orf30  |  |  |  |
|  |  |  |  |  |  |  | NA      | FAS       |  |  |  |
|  |  |  |  |  |  |  | CYP19A1 | PN01      |  |  |  |
|  |  |  |  |  |  |  | CLP1    | ADD3      |  |  |  |
|  |  |  |  |  |  |  | SLC35F4 | CANX      |  |  |  |
|  |  |  |  |  |  |  | IL27RA  | PSME4     |  |  |  |
|  |  |  |  |  |  |  | PARVA   | MPZL1     |  |  |  |
|  |  |  |  |  |  |  | CARD11  | TTC3      |  |  |  |
|  |  |  |  |  |  |  | NA      | TFRC      |  |  |  |
|  |  |  |  |  |  |  | MTMR11  | PRPF4B    |  |  |  |
|  |  |  |  |  |  |  | PDK4    | RAB1A     |  |  |  |
|  |  |  |  |  |  |  | FSTL5   | RHOBTB3   |  |  |  |
|  |  |  |  |  |  |  | NA      | ZNF192    |  |  |  |
|  |  |  |  |  |  |  | CSN1S1  | CHD4      |  |  |  |
|  |  |  |  |  |  |  | ANK1    | ATP1B1    |  |  |  |
|  |  |  |  |  |  |  | BCAS4   | NA        |  |  |  |
|  |  |  |  |  |  |  | CNIH4   | EIF1AX    |  |  |  |
|  |  |  |  |  |  |  | VASH1   | DEDD      |  |  |  |
|  |  |  |  |  |  |  | PPIH    | MOBK1B    |  |  |  |
|  |  |  |  |  |  |  | NA      | TP53      |  |  |  |
|  |  |  |  |  |  |  | TP53I11 | TMBIM6    |  |  |  |
|  |  |  |  |  |  |  | NA      | API5      |  |  |  |



|  |  |  |  |  |  |  |          |         |  |  |  |
|--|--|--|--|--|--|--|----------|---------|--|--|--|
|  |  |  |  |  |  |  | NA       | DDX3X   |  |  |  |
|  |  |  |  |  |  |  | SLC11A1  | HPCAL1  |  |  |  |
|  |  |  |  |  |  |  | DIXDC1   | ANAPC5  |  |  |  |
|  |  |  |  |  |  |  | ALOX5    | STX16   |  |  |  |
|  |  |  |  |  |  |  | VASH1    | EIF4E   |  |  |  |
|  |  |  |  |  |  |  | FOS      | TGOLN2  |  |  |  |
|  |  |  |  |  |  |  | CCDC40   | TMED2   |  |  |  |
|  |  |  |  |  |  |  | MIA2     | NA      |  |  |  |
|  |  |  |  |  |  |  | FOXQ1    | MBTPS2  |  |  |  |
|  |  |  |  |  |  |  | MNDA     | COMMD10 |  |  |  |
|  |  |  |  |  |  |  | NA       | CLCN3   |  |  |  |
|  |  |  |  |  |  |  | NA       | ERLIN1  |  |  |  |
|  |  |  |  |  |  |  | SLC1A2   | SRSF10  |  |  |  |
|  |  |  |  |  |  |  | CNIH4    | PSG3    |  |  |  |
|  |  |  |  |  |  |  | KIAA1274 | FKBP15  |  |  |  |
|  |  |  |  |  |  |  | TGM2     | GLYR1   |  |  |  |
|  |  |  |  |  |  |  | NA       | STS     |  |  |  |
|  |  |  |  |  |  |  | NA       | TIA1    |  |  |  |
|  |  |  |  |  |  |  | NA       | ANP32A  |  |  |  |
|  |  |  |  |  |  |  | COQ2     | SYNJ1   |  |  |  |
|  |  |  |  |  |  |  | WLS      | KCTD5   |  |  |  |
|  |  |  |  |  |  |  | MSRA     | NFYC    |  |  |  |
|  |  |  |  |  |  |  | NR4A3    | LARP4B  |  |  |  |
|  |  |  |  |  |  |  | APOC2    | KDM6A   |  |  |  |
|  |  |  |  |  |  |  | GSN      | ARHGDIA |  |  |  |
|  |  |  |  |  |  |  | TFAP2B   | POLR2E  |  |  |  |
|  |  |  |  |  |  |  | CCNA1    | WDR1    |  |  |  |
|  |  |  |  |  |  |  | LRRC1    | CCT2    |  |  |  |

|  |  |  |  |  |  |  |         |          |  |  |  |
|--|--|--|--|--|--|--|---------|----------|--|--|--|
|  |  |  |  |  |  |  | PRDM14  | STX3     |  |  |  |
|  |  |  |  |  |  |  | NA      | AMD1     |  |  |  |
|  |  |  |  |  |  |  | SMAD6   | PDE8A    |  |  |  |
|  |  |  |  |  |  |  | NA      | U2AF2    |  |  |  |
|  |  |  |  |  |  |  | NA      | BRCC3    |  |  |  |
|  |  |  |  |  |  |  | NA      | SERBP1   |  |  |  |
|  |  |  |  |  |  |  | NA      | KIF5B    |  |  |  |
|  |  |  |  |  |  |  | ST8SIA2 | HSPD1    |  |  |  |
|  |  |  |  |  |  |  | MAP3K2  | POLDIP3  |  |  |  |
|  |  |  |  |  |  |  | PHGDH   | PNO1     |  |  |  |
|  |  |  |  |  |  |  | NA      | YKT6     |  |  |  |
|  |  |  |  |  |  |  | TMEM111 | UBE3B    |  |  |  |
|  |  |  |  |  |  |  | STX6    | SEC63    |  |  |  |
|  |  |  |  |  |  |  | BEST1   | G3BP1    |  |  |  |
|  |  |  |  |  |  |  | PSEN1   | SLC1A4   |  |  |  |
|  |  |  |  |  |  |  | NA      | ADD3     |  |  |  |
|  |  |  |  |  |  |  | HIPK2   | ILF3     |  |  |  |
|  |  |  |  |  |  |  | MSR1    | CYB5B    |  |  |  |
|  |  |  |  |  |  |  | ARPP21  | ROCK2    |  |  |  |
|  |  |  |  |  |  |  | SBNO1   | PTPN11   |  |  |  |
|  |  |  |  |  |  |  | SP100   | MOBK1B   |  |  |  |
|  |  |  |  |  |  |  | NEDD9   | PTBP1    |  |  |  |
|  |  |  |  |  |  |  | PKD2L1  | RHOBTB3  |  |  |  |
|  |  |  |  |  |  |  | FBP1    | KIAA0776 |  |  |  |
|  |  |  |  |  |  |  | CCDC40  | ITGA4    |  |  |  |
|  |  |  |  |  |  |  | BEST1   | AGA      |  |  |  |
|  |  |  |  |  |  |  | TTC12   | GATC     |  |  |  |
|  |  |  |  |  |  |  | FAM71F2 | GPR137   |  |  |  |

|  |  |  |  |  |  |  |         |         |  |  |  |
|--|--|--|--|--|--|--|---------|---------|--|--|--|
|  |  |  |  |  |  |  | TOPORS  | GFPT1   |  |  |  |
|  |  |  |  |  |  |  | STX6    | STAM2   |  |  |  |
|  |  |  |  |  |  |  | B3GNT5  | DLG1    |  |  |  |
|  |  |  |  |  |  |  | GPR25   | ACTR2   |  |  |  |
|  |  |  |  |  |  |  | NA      | CDYL    |  |  |  |
|  |  |  |  |  |  |  | NA      | SMPD1   |  |  |  |
|  |  |  |  |  |  |  | EWSR1   | MARCKS  |  |  |  |
|  |  |  |  |  |  |  | ADC     | UBE2G2  |  |  |  |
|  |  |  |  |  |  |  | FBXO9   | EPB41L2 |  |  |  |
|  |  |  |  |  |  |  | NA      | AKIRIN1 |  |  |  |
|  |  |  |  |  |  |  | DYX1C1  | PSG6    |  |  |  |
|  |  |  |  |  |  |  | CELF6   | PREPL   |  |  |  |
|  |  |  |  |  |  |  | TMEM38B | MCM3AP  |  |  |  |
|  |  |  |  |  |  |  | NA      | GART    |  |  |  |
|  |  |  |  |  |  |  | TMED5   | ESF1    |  |  |  |
|  |  |  |  |  |  |  | NA      | NA      |  |  |  |
|  |  |  |  |  |  |  | DENND5B | CHD4    |  |  |  |
|  |  |  |  |  |  |  | ZNF527  | CLINT1  |  |  |  |
|  |  |  |  |  |  |  | SPTBN1  | DLG1    |  |  |  |
|  |  |  |  |  |  |  | NA      | SRPR    |  |  |  |
|  |  |  |  |  |  |  | MEX3C   | SEL1L3  |  |  |  |
|  |  |  |  |  |  |  | NA      | SLC35A2 |  |  |  |
|  |  |  |  |  |  |  | LRRC27  | SDHC    |  |  |  |
|  |  |  |  |  |  |  | GCHFR   | MMP1    |  |  |  |
|  |  |  |  |  |  |  | PGLYRP2 | AGPS    |  |  |  |
|  |  |  |  |  |  |  | CPD     | PLXNA2  |  |  |  |
|  |  |  |  |  |  |  | TRIO    | HNRNPR  |  |  |  |
|  |  |  |  |  |  |  | LMX1A   | SLC1A4  |  |  |  |

|  |  |  |  |  |  |  |           |          |  |  |  |
|--|--|--|--|--|--|--|-----------|----------|--|--|--|
|  |  |  |  |  |  |  | NA        | GRAP     |  |  |  |
|  |  |  |  |  |  |  | NA        | SRRT     |  |  |  |
|  |  |  |  |  |  |  | KCP       | KIAA0182 |  |  |  |
|  |  |  |  |  |  |  | GPR34     | C6orf62  |  |  |  |
|  |  |  |  |  |  |  | CADM4     | ORC5L    |  |  |  |
|  |  |  |  |  |  |  | ADAM8     | NUDT21   |  |  |  |
|  |  |  |  |  |  |  | AZI2      | LSS      |  |  |  |
|  |  |  |  |  |  |  | RIT2      | CTSS     |  |  |  |
|  |  |  |  |  |  |  | UTY       | PDCD4    |  |  |  |
|  |  |  |  |  |  |  | NA        | TBX1     |  |  |  |
|  |  |  |  |  |  |  | NA        | RNF14    |  |  |  |
|  |  |  |  |  |  |  | NA        | DIMT1L   |  |  |  |
|  |  |  |  |  |  |  | ARFGEF2   | PLEKHB2  |  |  |  |
|  |  |  |  |  |  |  | CDK5RAP2  | SRSF1    |  |  |  |
|  |  |  |  |  |  |  | NUP62CL   | CSTF2T   |  |  |  |
|  |  |  |  |  |  |  | PDCD1     | HS2ST1   |  |  |  |
|  |  |  |  |  |  |  | PTPDC1    | CSNK2A1  |  |  |  |
|  |  |  |  |  |  |  | PWRN2     | GM2A     |  |  |  |
|  |  |  |  |  |  |  | NA        | TOP1     |  |  |  |
|  |  |  |  |  |  |  | NA        | PTPRB    |  |  |  |
|  |  |  |  |  |  |  | PTPRZ1    | LSM12    |  |  |  |
|  |  |  |  |  |  |  | CDK3      | USP1     |  |  |  |
|  |  |  |  |  |  |  | RBP4      | ZFPL1    |  |  |  |
|  |  |  |  |  |  |  | NA        | TSPAN12  |  |  |  |
|  |  |  |  |  |  |  | NA        | SLC35A3  |  |  |  |
|  |  |  |  |  |  |  | PLAC1L    | DLAT     |  |  |  |
|  |  |  |  |  |  |  | C12orf49  | UBE2K    |  |  |  |
|  |  |  |  |  |  |  | LOC339807 | CCND2    |  |  |  |

|  |  |  |  |  |  |         |         |  |  |  |
|--|--|--|--|--|--|---------|---------|--|--|--|
|  |  |  |  |  |  | DYNC1H1 | DSCR3   |  |  |  |
|  |  |  |  |  |  | LRRC6   | GCLM    |  |  |  |
|  |  |  |  |  |  | NA      | PAPSS2  |  |  |  |
|  |  |  |  |  |  | CCDC40  | SEMA3C  |  |  |  |
|  |  |  |  |  |  | EFCAB5  | SRPK1   |  |  |  |
|  |  |  |  |  |  | SLC46A2 | SEL1L3  |  |  |  |
|  |  |  |  |  |  | NA      | CALM1   |  |  |  |
|  |  |  |  |  |  | NCR3    | GOT1    |  |  |  |
|  |  |  |  |  |  | TCEB3B  | MOBK1B  |  |  |  |
|  |  |  |  |  |  | SDCCAG8 | ACOT7   |  |  |  |
|  |  |  |  |  |  | TUBE1   | CSNK2A1 |  |  |  |
|  |  |  |  |  |  | SKIL    | DCAF7   |  |  |  |
|  |  |  |  |  |  | FCRL1   | IDH3A   |  |  |  |
|  |  |  |  |  |  | NA      | GALNT2  |  |  |  |
|  |  |  |  |  |  | GPR37   | PRPF6   |  |  |  |
|  |  |  |  |  |  | NA      | CCND2   |  |  |  |
|  |  |  |  |  |  | NA      | YBX1    |  |  |  |
|  |  |  |  |  |  | RALA    | C6orf62 |  |  |  |
|  |  |  |  |  |  | SYTL1   | UBE2N   |  |  |  |
|  |  |  |  |  |  | NA      | PPIF    |  |  |  |
|  |  |  |  |  |  | NKTR    | HSPA9   |  |  |  |
|  |  |  |  |  |  | CES4    | LARP4   |  |  |  |
|  |  |  |  |  |  | CAMP    | CYP20A1 |  |  |  |
|  |  |  |  |  |  | DDX52   | SLC35D1 |  |  |  |
|  |  |  |  |  |  | IL17RB  | EPHB2   |  |  |  |
|  |  |  |  |  |  | EPB41L5 | TFAM    |  |  |  |
|  |  |  |  |  |  | FOXG1   |         |  |  |  |
|  |  |  |  |  |  | NA      |         |  |  |  |

|  |  |  |  |  |  |  |              |  |  |  |  |
|--|--|--|--|--|--|--|--------------|--|--|--|--|
|  |  |  |  |  |  |  | GOLGA8IP     |  |  |  |  |
|  |  |  |  |  |  |  | FLJ33996     |  |  |  |  |
|  |  |  |  |  |  |  | NA           |  |  |  |  |
|  |  |  |  |  |  |  | GGT7         |  |  |  |  |
|  |  |  |  |  |  |  | NA           |  |  |  |  |
|  |  |  |  |  |  |  | NA           |  |  |  |  |
|  |  |  |  |  |  |  | ECE1         |  |  |  |  |
|  |  |  |  |  |  |  | SLC35D2      |  |  |  |  |
|  |  |  |  |  |  |  | TCTN2        |  |  |  |  |
|  |  |  |  |  |  |  | NA           |  |  |  |  |
|  |  |  |  |  |  |  | MYO6         |  |  |  |  |
|  |  |  |  |  |  |  | SLC44A5      |  |  |  |  |
|  |  |  |  |  |  |  | ATP13A3      |  |  |  |  |
|  |  |  |  |  |  |  | LIPG         |  |  |  |  |
|  |  |  |  |  |  |  | DENR         |  |  |  |  |
|  |  |  |  |  |  |  | ZNF540       |  |  |  |  |
|  |  |  |  |  |  |  | TPTE2P1      |  |  |  |  |
|  |  |  |  |  |  |  | NA           |  |  |  |  |
|  |  |  |  |  |  |  | POU3F1       |  |  |  |  |
|  |  |  |  |  |  |  | B3GNT5       |  |  |  |  |
|  |  |  |  |  |  |  | OSM          |  |  |  |  |
|  |  |  |  |  |  |  | BOLL         |  |  |  |  |
|  |  |  |  |  |  |  | NA           |  |  |  |  |
|  |  |  |  |  |  |  | A2ML1        |  |  |  |  |
|  |  |  |  |  |  |  | S100A8       |  |  |  |  |
|  |  |  |  |  |  |  | SH2D4A       |  |  |  |  |
|  |  |  |  |  |  |  | KLHL6        |  |  |  |  |
|  |  |  |  |  |  |  | LOC100287525 |  |  |  |  |

|  |  |  |  |  |  |           |  |  |  |  |
|--|--|--|--|--|--|-----------|--|--|--|--|
|  |  |  |  |  |  | SERPINB11 |  |  |  |  |
|  |  |  |  |  |  | TBC1D10C  |  |  |  |  |
|  |  |  |  |  |  | IL18BP    |  |  |  |  |
|  |  |  |  |  |  | SDC1      |  |  |  |  |
|  |  |  |  |  |  | NA        |  |  |  |  |
|  |  |  |  |  |  | GPR110    |  |  |  |  |
|  |  |  |  |  |  | NA        |  |  |  |  |
|  |  |  |  |  |  | TPSAB1    |  |  |  |  |
|  |  |  |  |  |  | SSH2      |  |  |  |  |
|  |  |  |  |  |  | NA        |  |  |  |  |
|  |  |  |  |  |  | C14orf109 |  |  |  |  |
|  |  |  |  |  |  | NA        |  |  |  |  |
|  |  |  |  |  |  | ELL2      |  |  |  |  |
|  |  |  |  |  |  | COL8A2    |  |  |  |  |
|  |  |  |  |  |  | DNAL1     |  |  |  |  |
|  |  |  |  |  |  | TMEM38B   |  |  |  |  |
|  |  |  |  |  |  | NDP       |  |  |  |  |
|  |  |  |  |  |  | FGFRL1    |  |  |  |  |
|  |  |  |  |  |  | PDE4DIP   |  |  |  |  |
|  |  |  |  |  |  | XPO1      |  |  |  |  |
|  |  |  |  |  |  | NA        |  |  |  |  |
|  |  |  |  |  |  | MKI67IP   |  |  |  |  |
|  |  |  |  |  |  | SLC7A1    |  |  |  |  |
|  |  |  |  |  |  | NA        |  |  |  |  |
|  |  |  |  |  |  | ALDH1A1   |  |  |  |  |
|  |  |  |  |  |  | NA        |  |  |  |  |
|  |  |  |  |  |  | PDXK      |  |  |  |  |
|  |  |  |  |  |  | RDH12     |  |  |  |  |

|  |  |  |  |  |  |  |          |  |  |  |  |
|--|--|--|--|--|--|--|----------|--|--|--|--|
|  |  |  |  |  |  |  | DNMT3B   |  |  |  |  |
|  |  |  |  |  |  |  | CYP2W1   |  |  |  |  |
|  |  |  |  |  |  |  | SYT2     |  |  |  |  |
|  |  |  |  |  |  |  | GLUL     |  |  |  |  |
|  |  |  |  |  |  |  | NA       |  |  |  |  |
|  |  |  |  |  |  |  | ZNF540   |  |  |  |  |
|  |  |  |  |  |  |  | CLIP3    |  |  |  |  |
|  |  |  |  |  |  |  | C9orf9   |  |  |  |  |
|  |  |  |  |  |  |  | NA       |  |  |  |  |
|  |  |  |  |  |  |  | NA       |  |  |  |  |
|  |  |  |  |  |  |  | NA       |  |  |  |  |
|  |  |  |  |  |  |  | DDX28    |  |  |  |  |
|  |  |  |  |  |  |  | NSFL1C   |  |  |  |  |
|  |  |  |  |  |  |  | STOX2    |  |  |  |  |
|  |  |  |  |  |  |  | SPDEF    |  |  |  |  |
|  |  |  |  |  |  |  | AGAP3    |  |  |  |  |
|  |  |  |  |  |  |  | TPSAB1   |  |  |  |  |
|  |  |  |  |  |  |  | NA       |  |  |  |  |
|  |  |  |  |  |  |  | CCDC123  |  |  |  |  |
|  |  |  |  |  |  |  | NA       |  |  |  |  |
|  |  |  |  |  |  |  | ORAI2    |  |  |  |  |
|  |  |  |  |  |  |  | KLF12    |  |  |  |  |
|  |  |  |  |  |  |  | NA       |  |  |  |  |
|  |  |  |  |  |  |  | SPINT1   |  |  |  |  |
|  |  |  |  |  |  |  | NA       |  |  |  |  |
|  |  |  |  |  |  |  | MIR155HG |  |  |  |  |
|  |  |  |  |  |  |  | NA       |  |  |  |  |
|  |  |  |  |  |  |  | NA       |  |  |  |  |



|  |  |  |  |  |  |              |  |  |  |  |
|--|--|--|--|--|--|--------------|--|--|--|--|
|  |  |  |  |  |  | KLHL29       |  |  |  |  |
|  |  |  |  |  |  | DDX3X        |  |  |  |  |
|  |  |  |  |  |  | ALK          |  |  |  |  |
|  |  |  |  |  |  | LOC158696    |  |  |  |  |
|  |  |  |  |  |  | ID3          |  |  |  |  |
|  |  |  |  |  |  | LOC728431    |  |  |  |  |
|  |  |  |  |  |  | NA           |  |  |  |  |
|  |  |  |  |  |  | B3GNT7       |  |  |  |  |
|  |  |  |  |  |  | MAB21L1      |  |  |  |  |
|  |  |  |  |  |  | TGIF1        |  |  |  |  |
|  |  |  |  |  |  | NA           |  |  |  |  |
|  |  |  |  |  |  | NA           |  |  |  |  |
|  |  |  |  |  |  | NA           |  |  |  |  |
|  |  |  |  |  |  | CACNA1G      |  |  |  |  |
|  |  |  |  |  |  | NA           |  |  |  |  |
|  |  |  |  |  |  | FAM82A2      |  |  |  |  |
|  |  |  |  |  |  | LOC100133131 |  |  |  |  |
|  |  |  |  |  |  | RNFT1        |  |  |  |  |
|  |  |  |  |  |  | LCK          |  |  |  |  |
|  |  |  |  |  |  | IL1A         |  |  |  |  |
|  |  |  |  |  |  | SLC16A3      |  |  |  |  |
|  |  |  |  |  |  | NA           |  |  |  |  |
|  |  |  |  |  |  | NA           |  |  |  |  |
|  |  |  |  |  |  | STX6         |  |  |  |  |
|  |  |  |  |  |  | MXD1         |  |  |  |  |
|  |  |  |  |  |  | REPS2        |  |  |  |  |
|  |  |  |  |  |  | C11orf75     |  |  |  |  |
|  |  |  |  |  |  | MLPH         |  |  |  |  |

|  |  |  |  |  |  |  |           |  |  |  |  |
|--|--|--|--|--|--|--|-----------|--|--|--|--|
|  |  |  |  |  |  |  | CCDC63    |  |  |  |  |
|  |  |  |  |  |  |  | ENO3      |  |  |  |  |
|  |  |  |  |  |  |  | RABGAP1L  |  |  |  |  |
|  |  |  |  |  |  |  | SORL1     |  |  |  |  |
|  |  |  |  |  |  |  | PHACTR1   |  |  |  |  |
|  |  |  |  |  |  |  | ERBB3     |  |  |  |  |
|  |  |  |  |  |  |  | NA        |  |  |  |  |
|  |  |  |  |  |  |  | C11orf63  |  |  |  |  |
|  |  |  |  |  |  |  | LOC731157 |  |  |  |  |
|  |  |  |  |  |  |  | CCDC114   |  |  |  |  |
|  |  |  |  |  |  |  | CHERP     |  |  |  |  |
|  |  |  |  |  |  |  | SKI       |  |  |  |  |
|  |  |  |  |  |  |  | ROCK1     |  |  |  |  |
|  |  |  |  |  |  |  | NA        |  |  |  |  |
|  |  |  |  |  |  |  | CPEB3     |  |  |  |  |
|  |  |  |  |  |  |  | NA        |  |  |  |  |
|  |  |  |  |  |  |  | NA        |  |  |  |  |
|  |  |  |  |  |  |  | AZI2      |  |  |  |  |
|  |  |  |  |  |  |  | TYRO3     |  |  |  |  |
|  |  |  |  |  |  |  | CRX       |  |  |  |  |
|  |  |  |  |  |  |  | FARP1     |  |  |  |  |
|  |  |  |  |  |  |  | NA        |  |  |  |  |
|  |  |  |  |  |  |  | NA        |  |  |  |  |
|  |  |  |  |  |  |  | ESR2      |  |  |  |  |
|  |  |  |  |  |  |  | ISM1      |  |  |  |  |
|  |  |  |  |  |  |  | NA        |  |  |  |  |
|  |  |  |  |  |  |  | FNDC3B    |  |  |  |  |
|  |  |  |  |  |  |  | GLUL      |  |  |  |  |

|  |  |  |  |  |  |  |           |  |  |  |  |
|--|--|--|--|--|--|--|-----------|--|--|--|--|
|  |  |  |  |  |  |  | UBE2E1    |  |  |  |  |
|  |  |  |  |  |  |  | SMAD6     |  |  |  |  |
|  |  |  |  |  |  |  | NA        |  |  |  |  |
|  |  |  |  |  |  |  | BLID      |  |  |  |  |
|  |  |  |  |  |  |  | WNT4      |  |  |  |  |
|  |  |  |  |  |  |  | PTPN22    |  |  |  |  |
|  |  |  |  |  |  |  | NA        |  |  |  |  |
|  |  |  |  |  |  |  | NA        |  |  |  |  |
|  |  |  |  |  |  |  | LOC285423 |  |  |  |  |
|  |  |  |  |  |  |  | NA        |  |  |  |  |
|  |  |  |  |  |  |  | LRPAP1    |  |  |  |  |
|  |  |  |  |  |  |  | TNS1      |  |  |  |  |
|  |  |  |  |  |  |  | NA        |  |  |  |  |
|  |  |  |  |  |  |  | NA        |  |  |  |  |
|  |  |  |  |  |  |  | RALGPS2   |  |  |  |  |
|  |  |  |  |  |  |  | NA        |  |  |  |  |
|  |  |  |  |  |  |  | SEMA7A    |  |  |  |  |
|  |  |  |  |  |  |  | ADAMTS19  |  |  |  |  |
|  |  |  |  |  |  |  | CPD       |  |  |  |  |
|  |  |  |  |  |  |  | C17orf66  |  |  |  |  |
|  |  |  |  |  |  |  | NA        |  |  |  |  |
|  |  |  |  |  |  |  | SNAI3     |  |  |  |  |
|  |  |  |  |  |  |  | DSTN      |  |  |  |  |
|  |  |  |  |  |  |  | STOM      |  |  |  |  |
|  |  |  |  |  |  |  | KCNIP4    |  |  |  |  |
|  |  |  |  |  |  |  | CHD9      |  |  |  |  |
|  |  |  |  |  |  |  | TACC2     |  |  |  |  |
|  |  |  |  |  |  |  | SLC25A30  |  |  |  |  |

|  |  |  |  |  |  |  |           |  |  |  |  |
|--|--|--|--|--|--|--|-----------|--|--|--|--|
|  |  |  |  |  |  |  | CXorf31   |  |  |  |  |
|  |  |  |  |  |  |  | TP63      |  |  |  |  |
|  |  |  |  |  |  |  | PDE4DIP   |  |  |  |  |
|  |  |  |  |  |  |  | SLC5A12   |  |  |  |  |
|  |  |  |  |  |  |  | NA        |  |  |  |  |
|  |  |  |  |  |  |  | RRAD      |  |  |  |  |
|  |  |  |  |  |  |  | NA        |  |  |  |  |
|  |  |  |  |  |  |  | HAPLN1    |  |  |  |  |
|  |  |  |  |  |  |  | SSH2      |  |  |  |  |
|  |  |  |  |  |  |  | LTBR      |  |  |  |  |
|  |  |  |  |  |  |  | NA        |  |  |  |  |
|  |  |  |  |  |  |  | NA        |  |  |  |  |
|  |  |  |  |  |  |  | ARL5A     |  |  |  |  |
|  |  |  |  |  |  |  | SYT14     |  |  |  |  |
|  |  |  |  |  |  |  | NA        |  |  |  |  |
|  |  |  |  |  |  |  | MBD4      |  |  |  |  |
|  |  |  |  |  |  |  | TNFRSF10D |  |  |  |  |
|  |  |  |  |  |  |  | 03-Mar    |  |  |  |  |
|  |  |  |  |  |  |  | PTPDC1    |  |  |  |  |
|  |  |  |  |  |  |  | TPSAB1    |  |  |  |  |
|  |  |  |  |  |  |  | CCDC68    |  |  |  |  |
|  |  |  |  |  |  |  | NA        |  |  |  |  |
|  |  |  |  |  |  |  | NA        |  |  |  |  |
|  |  |  |  |  |  |  | NA        |  |  |  |  |
|  |  |  |  |  |  |  | AK1       |  |  |  |  |
|  |  |  |  |  |  |  | CALHM3    |  |  |  |  |
|  |  |  |  |  |  |  | MAP4K2    |  |  |  |  |
|  |  |  |  |  |  |  | MID2      |  |  |  |  |

|  |  |  |  |  |  |  |          |  |  |  |  |
|--|--|--|--|--|--|--|----------|--|--|--|--|
|  |  |  |  |  |  |  | SSH2     |  |  |  |  |
|  |  |  |  |  |  |  | NA       |  |  |  |  |
|  |  |  |  |  |  |  | NA       |  |  |  |  |
|  |  |  |  |  |  |  | MAP1LC3A |  |  |  |  |
|  |  |  |  |  |  |  | IL1R2    |  |  |  |  |
|  |  |  |  |  |  |  | KIAA0317 |  |  |  |  |
|  |  |  |  |  |  |  | NA       |  |  |  |  |
|  |  |  |  |  |  |  | NA       |  |  |  |  |
|  |  |  |  |  |  |  | SCGN     |  |  |  |  |
|  |  |  |  |  |  |  | CNTNAP3  |  |  |  |  |
|  |  |  |  |  |  |  | ABCC3    |  |  |  |  |
|  |  |  |  |  |  |  | NA       |  |  |  |  |
|  |  |  |  |  |  |  | NA       |  |  |  |  |
|  |  |  |  |  |  |  | AGPAT2   |  |  |  |  |
|  |  |  |  |  |  |  | GNRHR    |  |  |  |  |
|  |  |  |  |  |  |  | NA       |  |  |  |  |
|  |  |  |  |  |  |  | AGRP     |  |  |  |  |
|  |  |  |  |  |  |  | GPD2     |  |  |  |  |
|  |  |  |  |  |  |  | TTC7A    |  |  |  |  |
|  |  |  |  |  |  |  | HES1     |  |  |  |  |
|  |  |  |  |  |  |  | MTMR11   |  |  |  |  |
|  |  |  |  |  |  |  | DMD      |  |  |  |  |
|  |  |  |  |  |  |  | MTMR3    |  |  |  |  |
|  |  |  |  |  |  |  | EML4     |  |  |  |  |
|  |  |  |  |  |  |  | DNASE1   |  |  |  |  |
|  |  |  |  |  |  |  | PNKD     |  |  |  |  |
|  |  |  |  |  |  |  | NA       |  |  |  |  |
|  |  |  |  |  |  |  | ACER3    |  |  |  |  |

|  |  |  |  |  |  |  |           |  |  |  |  |
|--|--|--|--|--|--|--|-----------|--|--|--|--|
|  |  |  |  |  |  |  | NPAS1     |  |  |  |  |
|  |  |  |  |  |  |  | PSEN2     |  |  |  |  |
|  |  |  |  |  |  |  | HIPK2     |  |  |  |  |
|  |  |  |  |  |  |  | MAPK8     |  |  |  |  |
|  |  |  |  |  |  |  | NA        |  |  |  |  |
|  |  |  |  |  |  |  | LOC553137 |  |  |  |  |
|  |  |  |  |  |  |  | UTRN      |  |  |  |  |
|  |  |  |  |  |  |  | NA        |  |  |  |  |
|  |  |  |  |  |  |  | BUB1      |  |  |  |  |
|  |  |  |  |  |  |  | NA        |  |  |  |  |
|  |  |  |  |  |  |  | TMEM38B   |  |  |  |  |
|  |  |  |  |  |  |  | NA        |  |  |  |  |
|  |  |  |  |  |  |  | DCUN1D3   |  |  |  |  |
|  |  |  |  |  |  |  | NA        |  |  |  |  |
|  |  |  |  |  |  |  | C8orf8    |  |  |  |  |
|  |  |  |  |  |  |  | CDH1      |  |  |  |  |
|  |  |  |  |  |  |  | NA        |  |  |  |  |
|  |  |  |  |  |  |  | NA        |  |  |  |  |
|  |  |  |  |  |  |  | IGKC      |  |  |  |  |
|  |  |  |  |  |  |  | EDNRB     |  |  |  |  |
|  |  |  |  |  |  |  | NA        |  |  |  |  |
|  |  |  |  |  |  |  | NA        |  |  |  |  |
|  |  |  |  |  |  |  | CDS1      |  |  |  |  |
|  |  |  |  |  |  |  | DNASE1    |  |  |  |  |
|  |  |  |  |  |  |  | GATA4     |  |  |  |  |
|  |  |  |  |  |  |  | SLC44A5   |  |  |  |  |
|  |  |  |  |  |  |  | WIP1      |  |  |  |  |
|  |  |  |  |  |  |  | PHTF1     |  |  |  |  |

|  |  |  |  |  |  |  |           |  |  |  |  |
|--|--|--|--|--|--|--|-----------|--|--|--|--|
|  |  |  |  |  |  |  | FTCD      |  |  |  |  |
|  |  |  |  |  |  |  | ZNF79     |  |  |  |  |
|  |  |  |  |  |  |  | SH3RF3    |  |  |  |  |
|  |  |  |  |  |  |  | C21orf67  |  |  |  |  |
|  |  |  |  |  |  |  | FLJ30375  |  |  |  |  |
|  |  |  |  |  |  |  | NA        |  |  |  |  |
|  |  |  |  |  |  |  | ZFP41     |  |  |  |  |
|  |  |  |  |  |  |  | NA        |  |  |  |  |
|  |  |  |  |  |  |  | GLRX      |  |  |  |  |
|  |  |  |  |  |  |  | NA        |  |  |  |  |
|  |  |  |  |  |  |  | C10orf95  |  |  |  |  |
|  |  |  |  |  |  |  | NA        |  |  |  |  |
|  |  |  |  |  |  |  | ID2B      |  |  |  |  |
|  |  |  |  |  |  |  | NA        |  |  |  |  |
|  |  |  |  |  |  |  | NA        |  |  |  |  |
|  |  |  |  |  |  |  | LOC541473 |  |  |  |  |
|  |  |  |  |  |  |  | LAIR1     |  |  |  |  |
|  |  |  |  |  |  |  | C6orf195  |  |  |  |  |
|  |  |  |  |  |  |  | FND5      |  |  |  |  |
|  |  |  |  |  |  |  | NA        |  |  |  |  |
|  |  |  |  |  |  |  | NA        |  |  |  |  |
|  |  |  |  |  |  |  | NA        |  |  |  |  |
|  |  |  |  |  |  |  | WDR52     |  |  |  |  |
|  |  |  |  |  |  |  | SPINK5    |  |  |  |  |
|  |  |  |  |  |  |  | NA        |  |  |  |  |
|  |  |  |  |  |  |  | LOC642587 |  |  |  |  |
|  |  |  |  |  |  |  | NA        |  |  |  |  |
|  |  |  |  |  |  |  | NA        |  |  |  |  |

|  |  |  |  |  |  |  |           |  |  |  |  |
|--|--|--|--|--|--|--|-----------|--|--|--|--|
|  |  |  |  |  |  |  | RGS12     |  |  |  |  |
|  |  |  |  |  |  |  | CNIH4     |  |  |  |  |
|  |  |  |  |  |  |  | TGM5      |  |  |  |  |
|  |  |  |  |  |  |  | KCP       |  |  |  |  |
|  |  |  |  |  |  |  | NA        |  |  |  |  |
|  |  |  |  |  |  |  | NA        |  |  |  |  |
|  |  |  |  |  |  |  | CYGB      |  |  |  |  |
|  |  |  |  |  |  |  | LONRF3    |  |  |  |  |
|  |  |  |  |  |  |  | SYT5      |  |  |  |  |
|  |  |  |  |  |  |  | SMAD6     |  |  |  |  |
|  |  |  |  |  |  |  | NA        |  |  |  |  |
|  |  |  |  |  |  |  | WLS       |  |  |  |  |
|  |  |  |  |  |  |  | LOC389634 |  |  |  |  |
|  |  |  |  |  |  |  | NA        |  |  |  |  |
|  |  |  |  |  |  |  | LOC121952 |  |  |  |  |
|  |  |  |  |  |  |  | DEFB124   |  |  |  |  |
|  |  |  |  |  |  |  | NA        |  |  |  |  |
|  |  |  |  |  |  |  | TNS1      |  |  |  |  |
|  |  |  |  |  |  |  | CYB5A     |  |  |  |  |
|  |  |  |  |  |  |  | NA        |  |  |  |  |
|  |  |  |  |  |  |  | NA        |  |  |  |  |
|  |  |  |  |  |  |  | MYO5BP2   |  |  |  |  |
|  |  |  |  |  |  |  | NLRP12    |  |  |  |  |
|  |  |  |  |  |  |  | P2RY11    |  |  |  |  |
|  |  |  |  |  |  |  | RNF183    |  |  |  |  |
|  |  |  |  |  |  |  | TLE3      |  |  |  |  |
|  |  |  |  |  |  |  | ABHD5     |  |  |  |  |
|  |  |  |  |  |  |  | C15orf62  |  |  |  |  |



|  |  |  |  |  |  |  |           |  |  |  |  |
|--|--|--|--|--|--|--|-----------|--|--|--|--|
|  |  |  |  |  |  |  | TRIM2     |  |  |  |  |
|  |  |  |  |  |  |  | LOC643837 |  |  |  |  |
|  |  |  |  |  |  |  | PRSS21    |  |  |  |  |
|  |  |  |  |  |  |  | SLC6A4    |  |  |  |  |
|  |  |  |  |  |  |  | TBC1D16   |  |  |  |  |
|  |  |  |  |  |  |  | ICK       |  |  |  |  |
|  |  |  |  |  |  |  | AQP3      |  |  |  |  |
|  |  |  |  |  |  |  | ABCD1     |  |  |  |  |
|  |  |  |  |  |  |  | OR51E1    |  |  |  |  |
|  |  |  |  |  |  |  | MINK1     |  |  |  |  |
|  |  |  |  |  |  |  | ZNF589    |  |  |  |  |
|  |  |  |  |  |  |  | NA        |  |  |  |  |
|  |  |  |  |  |  |  | ZNF800    |  |  |  |  |
|  |  |  |  |  |  |  | OLIG2     |  |  |  |  |
|  |  |  |  |  |  |  | KLHL6     |  |  |  |  |
|  |  |  |  |  |  |  | UNC13C    |  |  |  |  |
|  |  |  |  |  |  |  | RNF166    |  |  |  |  |
|  |  |  |  |  |  |  | LOC729178 |  |  |  |  |
|  |  |  |  |  |  |  | NA        |  |  |  |  |
|  |  |  |  |  |  |  | ST18      |  |  |  |  |
|  |  |  |  |  |  |  | PDPN      |  |  |  |  |
|  |  |  |  |  |  |  | NA        |  |  |  |  |
|  |  |  |  |  |  |  | CDKN1C    |  |  |  |  |
|  |  |  |  |  |  |  | PPP2R2C   |  |  |  |  |
|  |  |  |  |  |  |  | GAD2      |  |  |  |  |
|  |  |  |  |  |  |  | NA        |  |  |  |  |
|  |  |  |  |  |  |  | KCNK13    |  |  |  |  |
|  |  |  |  |  |  |  | C14orf56  |  |  |  |  |

|  |  |  |  |  |  |  |         |  |  |  |  |
|--|--|--|--|--|--|--|---------|--|--|--|--|
|  |  |  |  |  |  |  | NA      |  |  |  |  |
|  |  |  |  |  |  |  | KLK2    |  |  |  |  |
|  |  |  |  |  |  |  | LRRC43  |  |  |  |  |
|  |  |  |  |  |  |  | TRAIP   |  |  |  |  |
|  |  |  |  |  |  |  | NA      |  |  |  |  |
|  |  |  |  |  |  |  | NA      |  |  |  |  |
|  |  |  |  |  |  |  | TSPAN13 |  |  |  |  |
|  |  |  |  |  |  |  | MASP1   |  |  |  |  |
|  |  |  |  |  |  |  | FMNL3   |  |  |  |  |
|  |  |  |  |  |  |  | CACNA1E |  |  |  |  |
|  |  |  |  |  |  |  | FAM71B  |  |  |  |  |
|  |  |  |  |  |  |  | BPY2    |  |  |  |  |
|  |  |  |  |  |  |  | DBF4B   |  |  |  |  |
|  |  |  |  |  |  |  | SYTL3   |  |  |  |  |
|  |  |  |  |  |  |  | NA      |  |  |  |  |
|  |  |  |  |  |  |  | CYP2F1  |  |  |  |  |
|  |  |  |  |  |  |  | OR1J4   |  |  |  |  |
|  |  |  |  |  |  |  | GBP6    |  |  |  |  |
|  |  |  |  |  |  |  | PLCG1   |  |  |  |  |
|  |  |  |  |  |  |  | NA      |  |  |  |  |
|  |  |  |  |  |  |  | NA      |  |  |  |  |
|  |  |  |  |  |  |  | NA      |  |  |  |  |
|  |  |  |  |  |  |  | FBXO9   |  |  |  |  |
|  |  |  |  |  |  |  | LIPJ    |  |  |  |  |
|  |  |  |  |  |  |  | SCD     |  |  |  |  |
|  |  |  |  |  |  |  | NA      |  |  |  |  |
|  |  |  |  |  |  |  | NA      |  |  |  |  |
|  |  |  |  |  |  |  | TPD52   |  |  |  |  |

|  |  |  |  |  |  |  |           |  |  |  |  |
|--|--|--|--|--|--|--|-----------|--|--|--|--|
|  |  |  |  |  |  |  | NA        |  |  |  |  |
|  |  |  |  |  |  |  | KLHL11    |  |  |  |  |
|  |  |  |  |  |  |  | C9orf44   |  |  |  |  |
|  |  |  |  |  |  |  | LRRC37BP1 |  |  |  |  |
|  |  |  |  |  |  |  | NA        |  |  |  |  |
|  |  |  |  |  |  |  | IL1R2     |  |  |  |  |
|  |  |  |  |  |  |  | NA        |  |  |  |  |
|  |  |  |  |  |  |  | MAPKAPK2  |  |  |  |  |
|  |  |  |  |  |  |  | REPS2     |  |  |  |  |
|  |  |  |  |  |  |  | TMEM207   |  |  |  |  |
|  |  |  |  |  |  |  | TANC2     |  |  |  |  |
|  |  |  |  |  |  |  | NA        |  |  |  |  |
|  |  |  |  |  |  |  | GPR157    |  |  |  |  |
|  |  |  |  |  |  |  | TFEB      |  |  |  |  |
|  |  |  |  |  |  |  | TRIM36    |  |  |  |  |
|  |  |  |  |  |  |  | NA        |  |  |  |  |
|  |  |  |  |  |  |  | TPSAB1    |  |  |  |  |
|  |  |  |  |  |  |  | SLCO2B1   |  |  |  |  |
|  |  |  |  |  |  |  | PRR5L     |  |  |  |  |
|  |  |  |  |  |  |  | PPM1H     |  |  |  |  |
|  |  |  |  |  |  |  | PEX14     |  |  |  |  |
|  |  |  |  |  |  |  | CLDN23    |  |  |  |  |
|  |  |  |  |  |  |  | TRPM3     |  |  |  |  |
|  |  |  |  |  |  |  | ERMP1     |  |  |  |  |
|  |  |  |  |  |  |  | AMBRA1    |  |  |  |  |
|  |  |  |  |  |  |  | REPS2     |  |  |  |  |
|  |  |  |  |  |  |  | IL17RB    |  |  |  |  |
|  |  |  |  |  |  |  | SLC31A1   |  |  |  |  |

|  |  |  |  |  |  |  |          |  |  |  |  |
|--|--|--|--|--|--|--|----------|--|--|--|--|
|  |  |  |  |  |  |  | NA       |  |  |  |  |
|  |  |  |  |  |  |  | TRIO     |  |  |  |  |
|  |  |  |  |  |  |  | CYP19A1  |  |  |  |  |
|  |  |  |  |  |  |  | ASB15    |  |  |  |  |
|  |  |  |  |  |  |  | NA       |  |  |  |  |
|  |  |  |  |  |  |  | NA       |  |  |  |  |
|  |  |  |  |  |  |  | NA       |  |  |  |  |
|  |  |  |  |  |  |  | NA       |  |  |  |  |
|  |  |  |  |  |  |  | NKG7     |  |  |  |  |
|  |  |  |  |  |  |  | C20orf7  |  |  |  |  |
|  |  |  |  |  |  |  | C12orf48 |  |  |  |  |
|  |  |  |  |  |  |  | C18orf8  |  |  |  |  |
|  |  |  |  |  |  |  | SNX7     |  |  |  |  |
|  |  |  |  |  |  |  | LHX6     |  |  |  |  |
|  |  |  |  |  |  |  | USP22    |  |  |  |  |
|  |  |  |  |  |  |  | TLR3     |  |  |  |  |
|  |  |  |  |  |  |  | NA       |  |  |  |  |
|  |  |  |  |  |  |  | TASP1    |  |  |  |  |
|  |  |  |  |  |  |  | NA       |  |  |  |  |
|  |  |  |  |  |  |  | SNX10    |  |  |  |  |
|  |  |  |  |  |  |  | SLC4A11  |  |  |  |  |
|  |  |  |  |  |  |  | NA       |  |  |  |  |
|  |  |  |  |  |  |  | MBD4     |  |  |  |  |
|  |  |  |  |  |  |  | RAPGEF3  |  |  |  |  |
|  |  |  |  |  |  |  | RNFT1    |  |  |  |  |
|  |  |  |  |  |  |  | NA       |  |  |  |  |
|  |  |  |  |  |  |  | ST3GAL6  |  |  |  |  |
|  |  |  |  |  |  |  | TFCP2L1  |  |  |  |  |

|  |  |  |  |  |  |  |           |  |  |  |  |
|--|--|--|--|--|--|--|-----------|--|--|--|--|
|  |  |  |  |  |  |  | APOC4     |  |  |  |  |
|  |  |  |  |  |  |  | NA        |  |  |  |  |
|  |  |  |  |  |  |  | HOXB8     |  |  |  |  |
|  |  |  |  |  |  |  | NEB       |  |  |  |  |
|  |  |  |  |  |  |  | QPCT      |  |  |  |  |
|  |  |  |  |  |  |  | SGCB      |  |  |  |  |
|  |  |  |  |  |  |  | DUSP16    |  |  |  |  |
|  |  |  |  |  |  |  | ICOSLG    |  |  |  |  |
|  |  |  |  |  |  |  | NEK6      |  |  |  |  |
|  |  |  |  |  |  |  | ACER3     |  |  |  |  |
|  |  |  |  |  |  |  | CAPN5     |  |  |  |  |
|  |  |  |  |  |  |  | EHF       |  |  |  |  |
|  |  |  |  |  |  |  | NA        |  |  |  |  |
|  |  |  |  |  |  |  | ENOPH1    |  |  |  |  |
|  |  |  |  |  |  |  | NA        |  |  |  |  |
|  |  |  |  |  |  |  | NA        |  |  |  |  |
|  |  |  |  |  |  |  | SCD       |  |  |  |  |
|  |  |  |  |  |  |  | DGAT2     |  |  |  |  |
|  |  |  |  |  |  |  | TIAM2     |  |  |  |  |
|  |  |  |  |  |  |  | INADL     |  |  |  |  |
|  |  |  |  |  |  |  | N4BP2L1   |  |  |  |  |
|  |  |  |  |  |  |  | LOC149773 |  |  |  |  |
|  |  |  |  |  |  |  | TFR2      |  |  |  |  |
|  |  |  |  |  |  |  | HN1       |  |  |  |  |
|  |  |  |  |  |  |  | SLC23A3   |  |  |  |  |
|  |  |  |  |  |  |  | LOC646576 |  |  |  |  |
|  |  |  |  |  |  |  | CYP27A1   |  |  |  |  |
|  |  |  |  |  |  |  | CYB5A     |  |  |  |  |

|  |  |  |  |  |  |  |          |  |  |  |  |
|--|--|--|--|--|--|--|----------|--|--|--|--|
|  |  |  |  |  |  |  | NA       |  |  |  |  |
|  |  |  |  |  |  |  | KIAA1244 |  |  |  |  |
|  |  |  |  |  |  |  | NA       |  |  |  |  |
|  |  |  |  |  |  |  | HPS4     |  |  |  |  |
|  |  |  |  |  |  |  | SKIL     |  |  |  |  |
|  |  |  |  |  |  |  | PNPLA7   |  |  |  |  |
|  |  |  |  |  |  |  | NEK6     |  |  |  |  |
|  |  |  |  |  |  |  | CKLF     |  |  |  |  |
|  |  |  |  |  |  |  | GPR125   |  |  |  |  |
|  |  |  |  |  |  |  | NA       |  |  |  |  |
|  |  |  |  |  |  |  | NA       |  |  |  |  |
|  |  |  |  |  |  |  | EPB41L5  |  |  |  |  |
|  |  |  |  |  |  |  | BUB1     |  |  |  |  |
|  |  |  |  |  |  |  | PTH2R    |  |  |  |  |
|  |  |  |  |  |  |  | NA       |  |  |  |  |
|  |  |  |  |  |  |  | ESR1     |  |  |  |  |
|  |  |  |  |  |  |  | PAQR5    |  |  |  |  |
|  |  |  |  |  |  |  | ENG      |  |  |  |  |
|  |  |  |  |  |  |  | NA       |  |  |  |  |
|  |  |  |  |  |  |  | ABHD5    |  |  |  |  |
|  |  |  |  |  |  |  | DNAJC6   |  |  |  |  |
|  |  |  |  |  |  |  | AACSL    |  |  |  |  |
|  |  |  |  |  |  |  | OR4D2    |  |  |  |  |
|  |  |  |  |  |  |  | ATP2B2   |  |  |  |  |
|  |  |  |  |  |  |  | PARP10   |  |  |  |  |
|  |  |  |  |  |  |  | SLC24A1  |  |  |  |  |
|  |  |  |  |  |  |  | LFNG     |  |  |  |  |
|  |  |  |  |  |  |  | TFEB     |  |  |  |  |

|  |  |  |  |  |  |  |           |  |  |  |  |
|--|--|--|--|--|--|--|-----------|--|--|--|--|
|  |  |  |  |  |  |  | NA        |  |  |  |  |
|  |  |  |  |  |  |  | TFCP2L1   |  |  |  |  |
|  |  |  |  |  |  |  | CYP4Z2P   |  |  |  |  |
|  |  |  |  |  |  |  | ABCG1     |  |  |  |  |
|  |  |  |  |  |  |  | NA        |  |  |  |  |
|  |  |  |  |  |  |  | NA        |  |  |  |  |
|  |  |  |  |  |  |  | EPB41     |  |  |  |  |
|  |  |  |  |  |  |  | SLC6A15   |  |  |  |  |
|  |  |  |  |  |  |  | PKD1L2    |  |  |  |  |
|  |  |  |  |  |  |  | NA        |  |  |  |  |
|  |  |  |  |  |  |  | NA        |  |  |  |  |
|  |  |  |  |  |  |  | KLF14     |  |  |  |  |
|  |  |  |  |  |  |  | NA        |  |  |  |  |
|  |  |  |  |  |  |  | ARHGAP11A |  |  |  |  |
|  |  |  |  |  |  |  | LOC441461 |  |  |  |  |
|  |  |  |  |  |  |  | ABHD5     |  |  |  |  |
|  |  |  |  |  |  |  | NA        |  |  |  |  |
|  |  |  |  |  |  |  | NA        |  |  |  |  |
|  |  |  |  |  |  |  | RALA      |  |  |  |  |
|  |  |  |  |  |  |  | RHEB      |  |  |  |  |
|  |  |  |  |  |  |  | SRRM3     |  |  |  |  |
|  |  |  |  |  |  |  | NA        |  |  |  |  |
|  |  |  |  |  |  |  | SERHL2    |  |  |  |  |
|  |  |  |  |  |  |  | POPDC3    |  |  |  |  |
|  |  |  |  |  |  |  | APOL6     |  |  |  |  |
|  |  |  |  |  |  |  | NA        |  |  |  |  |
|  |  |  |  |  |  |  | CLDN6     |  |  |  |  |
|  |  |  |  |  |  |  | NA        |  |  |  |  |

|  |  |  |  |  |  |  |           |  |  |  |  |
|--|--|--|--|--|--|--|-----------|--|--|--|--|
|  |  |  |  |  |  |  | NA        |  |  |  |  |
|  |  |  |  |  |  |  | CYB5A     |  |  |  |  |
|  |  |  |  |  |  |  | SLC31A1   |  |  |  |  |
|  |  |  |  |  |  |  | NA        |  |  |  |  |
|  |  |  |  |  |  |  | TBC1D2    |  |  |  |  |
|  |  |  |  |  |  |  | NA        |  |  |  |  |
|  |  |  |  |  |  |  | NA        |  |  |  |  |
|  |  |  |  |  |  |  | NA        |  |  |  |  |
|  |  |  |  |  |  |  | GCG       |  |  |  |  |
|  |  |  |  |  |  |  | NSUN7     |  |  |  |  |
|  |  |  |  |  |  |  | NA        |  |  |  |  |
|  |  |  |  |  |  |  | AZI2      |  |  |  |  |
|  |  |  |  |  |  |  | C12orf37  |  |  |  |  |
|  |  |  |  |  |  |  | CKLF      |  |  |  |  |
|  |  |  |  |  |  |  | KIAA2026  |  |  |  |  |
|  |  |  |  |  |  |  | NA        |  |  |  |  |
|  |  |  |  |  |  |  | MGST1     |  |  |  |  |
|  |  |  |  |  |  |  | FANCC     |  |  |  |  |
|  |  |  |  |  |  |  | RSPO2     |  |  |  |  |
|  |  |  |  |  |  |  | CCR7      |  |  |  |  |
|  |  |  |  |  |  |  | SCCPDH    |  |  |  |  |
|  |  |  |  |  |  |  | PSG7      |  |  |  |  |
|  |  |  |  |  |  |  | C14orf142 |  |  |  |  |
|  |  |  |  |  |  |  | IQCF3     |  |  |  |  |
|  |  |  |  |  |  |  | CN5H6.4   |  |  |  |  |
|  |  |  |  |  |  |  | LPAR3     |  |  |  |  |
|  |  |  |  |  |  |  | MCOLN3    |  |  |  |  |
|  |  |  |  |  |  |  | ST14      |  |  |  |  |



|  |  |  |  |  |  |  |              |  |  |  |  |
|--|--|--|--|--|--|--|--------------|--|--|--|--|
|  |  |  |  |  |  |  | NA           |  |  |  |  |
|  |  |  |  |  |  |  | ST8SIA1      |  |  |  |  |
|  |  |  |  |  |  |  | NA           |  |  |  |  |
|  |  |  |  |  |  |  | SORL1        |  |  |  |  |
|  |  |  |  |  |  |  | FAM65C       |  |  |  |  |
|  |  |  |  |  |  |  | CXXC4        |  |  |  |  |
|  |  |  |  |  |  |  | ASGR1        |  |  |  |  |
|  |  |  |  |  |  |  | ZAN          |  |  |  |  |
|  |  |  |  |  |  |  | C1orf64      |  |  |  |  |
|  |  |  |  |  |  |  | CNTN5        |  |  |  |  |
|  |  |  |  |  |  |  | OPALIN       |  |  |  |  |
|  |  |  |  |  |  |  | RASGEF1B     |  |  |  |  |
|  |  |  |  |  |  |  | NA           |  |  |  |  |
|  |  |  |  |  |  |  | LOC100240726 |  |  |  |  |
|  |  |  |  |  |  |  | HES1         |  |  |  |  |
|  |  |  |  |  |  |  | NA           |  |  |  |  |
|  |  |  |  |  |  |  | NA           |  |  |  |  |
|  |  |  |  |  |  |  | SPATA2       |  |  |  |  |
|  |  |  |  |  |  |  | SLC36A4      |  |  |  |  |
|  |  |  |  |  |  |  | FBXL17       |  |  |  |  |
|  |  |  |  |  |  |  | NA           |  |  |  |  |
|  |  |  |  |  |  |  | NA           |  |  |  |  |
|  |  |  |  |  |  |  | SVEP1        |  |  |  |  |
|  |  |  |  |  |  |  | NA           |  |  |  |  |
|  |  |  |  |  |  |  | ATP9A        |  |  |  |  |
|  |  |  |  |  |  |  | PRAM1        |  |  |  |  |
|  |  |  |  |  |  |  | SKIL         |  |  |  |  |
|  |  |  |  |  |  |  | NA           |  |  |  |  |

|  |  |  |  |  |  |  |           |  |  |  |  |
|--|--|--|--|--|--|--|-----------|--|--|--|--|
|  |  |  |  |  |  |  | OGFOD1    |  |  |  |  |
|  |  |  |  |  |  |  | SDS       |  |  |  |  |
|  |  |  |  |  |  |  | CEACAM21  |  |  |  |  |
|  |  |  |  |  |  |  | CIT       |  |  |  |  |
|  |  |  |  |  |  |  | TYRO3     |  |  |  |  |
|  |  |  |  |  |  |  | BMX       |  |  |  |  |
|  |  |  |  |  |  |  | EDNRB     |  |  |  |  |
|  |  |  |  |  |  |  | TAGAP     |  |  |  |  |
|  |  |  |  |  |  |  | C10orf35  |  |  |  |  |
|  |  |  |  |  |  |  | TBC1D16   |  |  |  |  |
|  |  |  |  |  |  |  | SH3BP4    |  |  |  |  |
|  |  |  |  |  |  |  | NA        |  |  |  |  |
|  |  |  |  |  |  |  | LOC339751 |  |  |  |  |
|  |  |  |  |  |  |  | NA        |  |  |  |  |
|  |  |  |  |  |  |  | SLCO2B1   |  |  |  |  |
|  |  |  |  |  |  |  | IL7R      |  |  |  |  |
|  |  |  |  |  |  |  | MAPKAP1   |  |  |  |  |
|  |  |  |  |  |  |  | KRT7      |  |  |  |  |
|  |  |  |  |  |  |  | SAMD14    |  |  |  |  |
|  |  |  |  |  |  |  | SPAG1     |  |  |  |  |
|  |  |  |  |  |  |  | PDPN      |  |  |  |  |
|  |  |  |  |  |  |  | GPRIN3    |  |  |  |  |
|  |  |  |  |  |  |  | TLE3      |  |  |  |  |
|  |  |  |  |  |  |  | CHDH      |  |  |  |  |
|  |  |  |  |  |  |  | NA        |  |  |  |  |
|  |  |  |  |  |  |  | NAPSB     |  |  |  |  |
|  |  |  |  |  |  |  | TGM2      |  |  |  |  |
|  |  |  |  |  |  |  | NA        |  |  |  |  |

|  |  |  |  |  |  |              |  |  |  |  |
|--|--|--|--|--|--|--------------|--|--|--|--|
|  |  |  |  |  |  | DYX1C1       |  |  |  |  |
|  |  |  |  |  |  | CARNS1       |  |  |  |  |
|  |  |  |  |  |  | NA           |  |  |  |  |
|  |  |  |  |  |  | DENND1B      |  |  |  |  |
|  |  |  |  |  |  | FHAD1        |  |  |  |  |
|  |  |  |  |  |  | MCOLN3       |  |  |  |  |
|  |  |  |  |  |  | NA           |  |  |  |  |
|  |  |  |  |  |  | ABCG1        |  |  |  |  |
|  |  |  |  |  |  | WIPI1        |  |  |  |  |
|  |  |  |  |  |  | BIN2         |  |  |  |  |
|  |  |  |  |  |  | NA           |  |  |  |  |
|  |  |  |  |  |  | LOC100293679 |  |  |  |  |
|  |  |  |  |  |  | NA           |  |  |  |  |
|  |  |  |  |  |  | KCNA2        |  |  |  |  |
|  |  |  |  |  |  | ZNF81        |  |  |  |  |
|  |  |  |  |  |  | TRA2A        |  |  |  |  |
|  |  |  |  |  |  | NCRNA00257   |  |  |  |  |
|  |  |  |  |  |  | TMEM144      |  |  |  |  |
|  |  |  |  |  |  | MFI2         |  |  |  |  |
|  |  |  |  |  |  | MS4A12       |  |  |  |  |
|  |  |  |  |  |  | KL           |  |  |  |  |
|  |  |  |  |  |  | ITGA9        |  |  |  |  |
|  |  |  |  |  |  | NA           |  |  |  |  |
|  |  |  |  |  |  | TNFSF13      |  |  |  |  |
|  |  |  |  |  |  | KLHL6        |  |  |  |  |
|  |  |  |  |  |  | TRIO         |  |  |  |  |
|  |  |  |  |  |  | NA           |  |  |  |  |
|  |  |  |  |  |  | GPCPD1       |  |  |  |  |

|  |  |  |  |  |  |  |            |  |  |  |  |
|--|--|--|--|--|--|--|------------|--|--|--|--|
|  |  |  |  |  |  |  | NA         |  |  |  |  |
|  |  |  |  |  |  |  | NCRNA00221 |  |  |  |  |
|  |  |  |  |  |  |  | ACER3      |  |  |  |  |
|  |  |  |  |  |  |  | NA         |  |  |  |  |
|  |  |  |  |  |  |  | CADM1      |  |  |  |  |
|  |  |  |  |  |  |  | NUDT22     |  |  |  |  |
|  |  |  |  |  |  |  | CHGB       |  |  |  |  |
|  |  |  |  |  |  |  | LOC440602  |  |  |  |  |
|  |  |  |  |  |  |  | SDSL       |  |  |  |  |
|  |  |  |  |  |  |  | ID2        |  |  |  |  |
|  |  |  |  |  |  |  | NA         |  |  |  |  |
|  |  |  |  |  |  |  | SLC31A1    |  |  |  |  |
|  |  |  |  |  |  |  | CLDN23     |  |  |  |  |
|  |  |  |  |  |  |  | NA         |  |  |  |  |
|  |  |  |  |  |  |  | PARD3B     |  |  |  |  |
|  |  |  |  |  |  |  | PTPN22     |  |  |  |  |
|  |  |  |  |  |  |  | LOC728705  |  |  |  |  |
|  |  |  |  |  |  |  | SLC9A5     |  |  |  |  |
|  |  |  |  |  |  |  | NA         |  |  |  |  |
|  |  |  |  |  |  |  | PTGDR      |  |  |  |  |
|  |  |  |  |  |  |  | PDE4DIP    |  |  |  |  |
|  |  |  |  |  |  |  | SARDH      |  |  |  |  |
|  |  |  |  |  |  |  | GPCPD1     |  |  |  |  |
|  |  |  |  |  |  |  | NA         |  |  |  |  |
|  |  |  |  |  |  |  | CD1D       |  |  |  |  |
|  |  |  |  |  |  |  | NA         |  |  |  |  |
|  |  |  |  |  |  |  | GRAMD4     |  |  |  |  |
|  |  |  |  |  |  |  | NA         |  |  |  |  |

|  |  |  |  |  |  |  |         |  |  |  |  |
|--|--|--|--|--|--|--|---------|--|--|--|--|
|  |  |  |  |  |  |  | LTB     |  |  |  |  |
|  |  |  |  |  |  |  | RG56    |  |  |  |  |
|  |  |  |  |  |  |  | NA      |  |  |  |  |
|  |  |  |  |  |  |  | NA      |  |  |  |  |
|  |  |  |  |  |  |  | ERN2    |  |  |  |  |
|  |  |  |  |  |  |  | ST14    |  |  |  |  |
|  |  |  |  |  |  |  | CNR1    |  |  |  |  |
|  |  |  |  |  |  |  | CRNDE   |  |  |  |  |
|  |  |  |  |  |  |  | HIVEP3  |  |  |  |  |
|  |  |  |  |  |  |  | NA      |  |  |  |  |
|  |  |  |  |  |  |  | NA      |  |  |  |  |
|  |  |  |  |  |  |  | NA      |  |  |  |  |
|  |  |  |  |  |  |  | TGM4    |  |  |  |  |
|  |  |  |  |  |  |  | CKLF    |  |  |  |  |
|  |  |  |  |  |  |  | NA      |  |  |  |  |
|  |  |  |  |  |  |  | NA      |  |  |  |  |
|  |  |  |  |  |  |  | ACER3   |  |  |  |  |
|  |  |  |  |  |  |  | CHDH    |  |  |  |  |
|  |  |  |  |  |  |  | ALDOB   |  |  |  |  |
|  |  |  |  |  |  |  | TPMT    |  |  |  |  |
|  |  |  |  |  |  |  | SLC27A2 |  |  |  |  |
|  |  |  |  |  |  |  | NA      |  |  |  |  |
|  |  |  |  |  |  |  | NA      |  |  |  |  |
|  |  |  |  |  |  |  | PSME4   |  |  |  |  |
|  |  |  |  |  |  |  | PTPRD   |  |  |  |  |
|  |  |  |  |  |  |  | CASZ1   |  |  |  |  |
|  |  |  |  |  |  |  | CAPN9   |  |  |  |  |
|  |  |  |  |  |  |  | ZC3H12B |  |  |  |  |

|  |  |  |  |  |  |  |           |  |  |  |  |
|--|--|--|--|--|--|--|-----------|--|--|--|--|
|  |  |  |  |  |  |  | LOC646482 |  |  |  |  |
|  |  |  |  |  |  |  | NA        |  |  |  |  |
|  |  |  |  |  |  |  | MAP3K2    |  |  |  |  |
|  |  |  |  |  |  |  | NA        |  |  |  |  |
|  |  |  |  |  |  |  | SPIRE2    |  |  |  |  |
|  |  |  |  |  |  |  | ZNF589    |  |  |  |  |
|  |  |  |  |  |  |  | SCML4     |  |  |  |  |
|  |  |  |  |  |  |  | NA        |  |  |  |  |
|  |  |  |  |  |  |  | RNF213    |  |  |  |  |
|  |  |  |  |  |  |  | PRSS8     |  |  |  |  |
|  |  |  |  |  |  |  | STRBP     |  |  |  |  |
|  |  |  |  |  |  |  | KLHL23    |  |  |  |  |
|  |  |  |  |  |  |  | OR10H3    |  |  |  |  |
|  |  |  |  |  |  |  | C14orf162 |  |  |  |  |
|  |  |  |  |  |  |  | NA        |  |  |  |  |
|  |  |  |  |  |  |  | NA        |  |  |  |  |
|  |  |  |  |  |  |  | MRPS12    |  |  |  |  |
|  |  |  |  |  |  |  | ITGB3     |  |  |  |  |
|  |  |  |  |  |  |  | ITGB1BP1  |  |  |  |  |
|  |  |  |  |  |  |  | WDHD1     |  |  |  |  |
|  |  |  |  |  |  |  | C22orf45  |  |  |  |  |
|  |  |  |  |  |  |  | FAM164A   |  |  |  |  |
|  |  |  |  |  |  |  | NA        |  |  |  |  |
|  |  |  |  |  |  |  | IL4       |  |  |  |  |
|  |  |  |  |  |  |  | SYDE1     |  |  |  |  |
|  |  |  |  |  |  |  | NA        |  |  |  |  |
|  |  |  |  |  |  |  | NUSAP1    |  |  |  |  |
|  |  |  |  |  |  |  | TAS2R4    |  |  |  |  |

|  |  |  |  |  |  |  |          |  |  |  |  |
|--|--|--|--|--|--|--|----------|--|--|--|--|
|  |  |  |  |  |  |  | ZNF451   |  |  |  |  |
|  |  |  |  |  |  |  | NA       |  |  |  |  |
|  |  |  |  |  |  |  | NA       |  |  |  |  |
|  |  |  |  |  |  |  | C17orf99 |  |  |  |  |
|  |  |  |  |  |  |  | NA       |  |  |  |  |
|  |  |  |  |  |  |  | C18orf62 |  |  |  |  |
|  |  |  |  |  |  |  | EDNRB    |  |  |  |  |
|  |  |  |  |  |  |  | ACER3    |  |  |  |  |
|  |  |  |  |  |  |  | NA       |  |  |  |  |
|  |  |  |  |  |  |  | WLS      |  |  |  |  |
|  |  |  |  |  |  |  | VDR      |  |  |  |  |
|  |  |  |  |  |  |  | TRIM2    |  |  |  |  |
|  |  |  |  |  |  |  | NA       |  |  |  |  |
|  |  |  |  |  |  |  | PRR15    |  |  |  |  |
|  |  |  |  |  |  |  | PGP      |  |  |  |  |
|  |  |  |  |  |  |  | ATP6V0A2 |  |  |  |  |
|  |  |  |  |  |  |  | DHDH     |  |  |  |  |
|  |  |  |  |  |  |  | NA       |  |  |  |  |
|  |  |  |  |  |  |  | NA       |  |  |  |  |
|  |  |  |  |  |  |  | DGAT2    |  |  |  |  |
|  |  |  |  |  |  |  | NA       |  |  |  |  |
|  |  |  |  |  |  |  | TRAF3IP2 |  |  |  |  |
|  |  |  |  |  |  |  | MAST3    |  |  |  |  |
|  |  |  |  |  |  |  | NA       |  |  |  |  |
|  |  |  |  |  |  |  | NA       |  |  |  |  |
|  |  |  |  |  |  |  | ERLIN1   |  |  |  |  |
|  |  |  |  |  |  |  | NA       |  |  |  |  |
|  |  |  |  |  |  |  | NA       |  |  |  |  |

|  |  |  |  |  |  |  |           |  |  |  |  |
|--|--|--|--|--|--|--|-----------|--|--|--|--|
|  |  |  |  |  |  |  | C6orf142  |  |  |  |  |
|  |  |  |  |  |  |  | TNXB      |  |  |  |  |
|  |  |  |  |  |  |  | NA        |  |  |  |  |
|  |  |  |  |  |  |  | TRIM58    |  |  |  |  |
|  |  |  |  |  |  |  | KIAA1543  |  |  |  |  |
|  |  |  |  |  |  |  | SLC22A5   |  |  |  |  |
|  |  |  |  |  |  |  | NA        |  |  |  |  |
|  |  |  |  |  |  |  | LOC151121 |  |  |  |  |
|  |  |  |  |  |  |  | LOC553103 |  |  |  |  |
|  |  |  |  |  |  |  | KIF23     |  |  |  |  |
|  |  |  |  |  |  |  | TNFSF14   |  |  |  |  |
|  |  |  |  |  |  |  | PSME4     |  |  |  |  |
|  |  |  |  |  |  |  | IL18R1    |  |  |  |  |
|  |  |  |  |  |  |  | PDE4B     |  |  |  |  |
|  |  |  |  |  |  |  | GKAP1     |  |  |  |  |
|  |  |  |  |  |  |  | LOC285045 |  |  |  |  |
|  |  |  |  |  |  |  | NA        |  |  |  |  |
|  |  |  |  |  |  |  | IL7R      |  |  |  |  |
|  |  |  |  |  |  |  | AKR1C3    |  |  |  |  |
|  |  |  |  |  |  |  | VPS45     |  |  |  |  |
|  |  |  |  |  |  |  | NA        |  |  |  |  |
|  |  |  |  |  |  |  | VWF       |  |  |  |  |
|  |  |  |  |  |  |  | HES1      |  |  |  |  |
|  |  |  |  |  |  |  | GPRIN3    |  |  |  |  |
|  |  |  |  |  |  |  | GH1       |  |  |  |  |
|  |  |  |  |  |  |  | NA        |  |  |  |  |
|  |  |  |  |  |  |  | NA        |  |  |  |  |
|  |  |  |  |  |  |  | CCDC129   |  |  |  |  |



|  |  |  |  |  |  |  |          |  |  |  |  |
|--|--|--|--|--|--|--|----------|--|--|--|--|
|  |  |  |  |  |  |  | CEACAM21 |  |  |  |  |
|  |  |  |  |  |  |  | STEAP3   |  |  |  |  |
|  |  |  |  |  |  |  | NA       |  |  |  |  |
|  |  |  |  |  |  |  | TSPAN17  |  |  |  |  |
|  |  |  |  |  |  |  | PM20D2   |  |  |  |  |
|  |  |  |  |  |  |  | PKHD1L1  |  |  |  |  |
|  |  |  |  |  |  |  | NA       |  |  |  |  |
|  |  |  |  |  |  |  | ZNF608   |  |  |  |  |
|  |  |  |  |  |  |  | SOX1     |  |  |  |  |
|  |  |  |  |  |  |  | HMGB3    |  |  |  |  |
|  |  |  |  |  |  |  | MYOZ2    |  |  |  |  |
|  |  |  |  |  |  |  | NA       |  |  |  |  |
|  |  |  |  |  |  |  | FLJ37453 |  |  |  |  |
|  |  |  |  |  |  |  | ATOX8    |  |  |  |  |
|  |  |  |  |  |  |  | ERGIC1   |  |  |  |  |
|  |  |  |  |  |  |  | SERPINA1 |  |  |  |  |
|  |  |  |  |  |  |  | NA       |  |  |  |  |
|  |  |  |  |  |  |  | ATP8B1   |  |  |  |  |
|  |  |  |  |  |  |  | CDS1     |  |  |  |  |
|  |  |  |  |  |  |  | KRT222   |  |  |  |  |
|  |  |  |  |  |  |  | IL1B     |  |  |  |  |
|  |  |  |  |  |  |  | NA       |  |  |  |  |
|  |  |  |  |  |  |  | NA       |  |  |  |  |
|  |  |  |  |  |  |  | FAM195A  |  |  |  |  |
|  |  |  |  |  |  |  | NA       |  |  |  |  |
|  |  |  |  |  |  |  | VRK3     |  |  |  |  |
|  |  |  |  |  |  |  | MRE11A   |  |  |  |  |
|  |  |  |  |  |  |  | DENND1B  |  |  |  |  |

|  |  |  |  |  |  |               |  |  |  |  |
|--|--|--|--|--|--|---------------|--|--|--|--|
|  |  |  |  |  |  | C18orf16      |  |  |  |  |
|  |  |  |  |  |  | GPCPD1        |  |  |  |  |
|  |  |  |  |  |  | NA            |  |  |  |  |
|  |  |  |  |  |  | CNTNAP2       |  |  |  |  |
|  |  |  |  |  |  | FAM195A       |  |  |  |  |
|  |  |  |  |  |  | NEK11         |  |  |  |  |
|  |  |  |  |  |  | NA            |  |  |  |  |
|  |  |  |  |  |  | NA            |  |  |  |  |
|  |  |  |  |  |  | EDN3          |  |  |  |  |
|  |  |  |  |  |  | HNF4A         |  |  |  |  |
|  |  |  |  |  |  | NA            |  |  |  |  |
|  |  |  |  |  |  | GLTSCR2       |  |  |  |  |
|  |  |  |  |  |  | ARID5B        |  |  |  |  |
|  |  |  |  |  |  | DAB2IP        |  |  |  |  |
|  |  |  |  |  |  | STX6          |  |  |  |  |
|  |  |  |  |  |  | TRIM50        |  |  |  |  |
|  |  |  |  |  |  | PNPLA3        |  |  |  |  |
|  |  |  |  |  |  | LOC389023     |  |  |  |  |
|  |  |  |  |  |  | BCL2L2        |  |  |  |  |
|  |  |  |  |  |  | DKFZp566F0947 |  |  |  |  |
|  |  |  |  |  |  | NA            |  |  |  |  |
|  |  |  |  |  |  | MGST1         |  |  |  |  |
|  |  |  |  |  |  | VDR           |  |  |  |  |
|  |  |  |  |  |  | MAOA          |  |  |  |  |
|  |  |  |  |  |  | H2AFY2        |  |  |  |  |
|  |  |  |  |  |  | HRK           |  |  |  |  |
|  |  |  |  |  |  | NA            |  |  |  |  |
|  |  |  |  |  |  | SYNPR         |  |  |  |  |

|  |  |  |  |  |  |  |           |  |  |  |  |
|--|--|--|--|--|--|--|-----------|--|--|--|--|
|  |  |  |  |  |  |  | BSND      |  |  |  |  |
|  |  |  |  |  |  |  | HN1       |  |  |  |  |
|  |  |  |  |  |  |  | GPD1      |  |  |  |  |
|  |  |  |  |  |  |  | ALX4      |  |  |  |  |
|  |  |  |  |  |  |  | CRMP1     |  |  |  |  |
|  |  |  |  |  |  |  | NA        |  |  |  |  |
|  |  |  |  |  |  |  | TBC1D16   |  |  |  |  |
|  |  |  |  |  |  |  | NA        |  |  |  |  |
|  |  |  |  |  |  |  | SLC25A37  |  |  |  |  |
|  |  |  |  |  |  |  | WDHD1     |  |  |  |  |
|  |  |  |  |  |  |  | NA        |  |  |  |  |
|  |  |  |  |  |  |  | MGST1     |  |  |  |  |
|  |  |  |  |  |  |  | PRY       |  |  |  |  |
|  |  |  |  |  |  |  | PTK2B     |  |  |  |  |
|  |  |  |  |  |  |  | LOC340017 |  |  |  |  |
|  |  |  |  |  |  |  | CAMK4     |  |  |  |  |
|  |  |  |  |  |  |  | MGST1     |  |  |  |  |
|  |  |  |  |  |  |  | FANCI     |  |  |  |  |
|  |  |  |  |  |  |  | C15orf48  |  |  |  |  |
|  |  |  |  |  |  |  | NA        |  |  |  |  |
|  |  |  |  |  |  |  | ATP9B     |  |  |  |  |
|  |  |  |  |  |  |  | CHDH      |  |  |  |  |
|  |  |  |  |  |  |  | ADAM3A    |  |  |  |  |
|  |  |  |  |  |  |  | HOXA3     |  |  |  |  |
|  |  |  |  |  |  |  | GNA14     |  |  |  |  |
|  |  |  |  |  |  |  | MPP7      |  |  |  |  |
|  |  |  |  |  |  |  | MBNL1     |  |  |  |  |
|  |  |  |  |  |  |  | FLJ90680  |  |  |  |  |

|  |  |  |  |  |  |  |              |  |  |  |  |
|--|--|--|--|--|--|--|--------------|--|--|--|--|
|  |  |  |  |  |  |  | NA           |  |  |  |  |
|  |  |  |  |  |  |  | C11orf93     |  |  |  |  |
|  |  |  |  |  |  |  | TFCP2L1      |  |  |  |  |
|  |  |  |  |  |  |  | SLC34A1      |  |  |  |  |
|  |  |  |  |  |  |  | TMEM185A     |  |  |  |  |
|  |  |  |  |  |  |  | NA           |  |  |  |  |
|  |  |  |  |  |  |  | C6orf182     |  |  |  |  |
|  |  |  |  |  |  |  | KRT38        |  |  |  |  |
|  |  |  |  |  |  |  | PAPLN        |  |  |  |  |
|  |  |  |  |  |  |  | SEMA6A       |  |  |  |  |
|  |  |  |  |  |  |  | HS6ST3       |  |  |  |  |
|  |  |  |  |  |  |  | MAP1LC3A     |  |  |  |  |
|  |  |  |  |  |  |  | C5orf56      |  |  |  |  |
|  |  |  |  |  |  |  | BRSK1        |  |  |  |  |
|  |  |  |  |  |  |  | IL1B         |  |  |  |  |
|  |  |  |  |  |  |  | APCDD1       |  |  |  |  |
|  |  |  |  |  |  |  | SLC35F1      |  |  |  |  |
|  |  |  |  |  |  |  | NA           |  |  |  |  |
|  |  |  |  |  |  |  | TMEM144      |  |  |  |  |
|  |  |  |  |  |  |  | CCDC125      |  |  |  |  |
|  |  |  |  |  |  |  | FDX1         |  |  |  |  |
|  |  |  |  |  |  |  | RFFL         |  |  |  |  |
|  |  |  |  |  |  |  | NA           |  |  |  |  |
|  |  |  |  |  |  |  | SLC25A35     |  |  |  |  |
|  |  |  |  |  |  |  | ANP32C       |  |  |  |  |
|  |  |  |  |  |  |  | SERPINA1     |  |  |  |  |
|  |  |  |  |  |  |  | LOC100131733 |  |  |  |  |
|  |  |  |  |  |  |  | APOA2        |  |  |  |  |

|  |  |  |  |  |  |  |           |  |  |  |  |
|--|--|--|--|--|--|--|-----------|--|--|--|--|
|  |  |  |  |  |  |  | ID1       |  |  |  |  |
|  |  |  |  |  |  |  | SV2B      |  |  |  |  |
|  |  |  |  |  |  |  | GALNT2    |  |  |  |  |
|  |  |  |  |  |  |  | LOC652993 |  |  |  |  |
|  |  |  |  |  |  |  | NA        |  |  |  |  |
|  |  |  |  |  |  |  | ZNF552    |  |  |  |  |
|  |  |  |  |  |  |  | TRAC      |  |  |  |  |
|  |  |  |  |  |  |  | TOP2A     |  |  |  |  |
|  |  |  |  |  |  |  | ID2       |  |  |  |  |
|  |  |  |  |  |  |  | LYPD6     |  |  |  |  |
|  |  |  |  |  |  |  | NA        |  |  |  |  |
|  |  |  |  |  |  |  | NA        |  |  |  |  |
|  |  |  |  |  |  |  | EPB41L5   |  |  |  |  |
|  |  |  |  |  |  |  | IQGAP3    |  |  |  |  |
|  |  |  |  |  |  |  | NA        |  |  |  |  |
|  |  |  |  |  |  |  | ZNF627    |  |  |  |  |
|  |  |  |  |  |  |  | NA        |  |  |  |  |
|  |  |  |  |  |  |  | GPD2      |  |  |  |  |
|  |  |  |  |  |  |  | NA        |  |  |  |  |
|  |  |  |  |  |  |  | CDH23     |  |  |  |  |
|  |  |  |  |  |  |  | L3MBTL4   |  |  |  |  |
|  |  |  |  |  |  |  | NA        |  |  |  |  |
|  |  |  |  |  |  |  | FNBP1L    |  |  |  |  |
|  |  |  |  |  |  |  | PDE1B     |  |  |  |  |
|  |  |  |  |  |  |  | NA        |  |  |  |  |
|  |  |  |  |  |  |  | NA        |  |  |  |  |
|  |  |  |  |  |  |  | LOC645638 |  |  |  |  |
|  |  |  |  |  |  |  | DUSP16    |  |  |  |  |

|  |  |  |  |  |  |  |         |  |  |  |  |
|--|--|--|--|--|--|--|---------|--|--|--|--|
|  |  |  |  |  |  |  | VDR     |  |  |  |  |
|  |  |  |  |  |  |  | NKD1    |  |  |  |  |
|  |  |  |  |  |  |  | PPP1R9A |  |  |  |  |
|  |  |  |  |  |  |  | PSPH    |  |  |  |  |
|  |  |  |  |  |  |  | GABRA1  |  |  |  |  |
|  |  |  |  |  |  |  | C9orf68 |  |  |  |  |
|  |  |  |  |  |  |  | STRBP   |  |  |  |  |
|  |  |  |  |  |  |  | NA      |  |  |  |  |
|  |  |  |  |  |  |  | GLTPD2  |  |  |  |  |
|  |  |  |  |  |  |  | SAMD11  |  |  |  |  |
|  |  |  |  |  |  |  | MAOA    |  |  |  |  |
|  |  |  |  |  |  |  | SLC35D1 |  |  |  |  |
|  |  |  |  |  |  |  | CEACAM7 |  |  |  |  |
|  |  |  |  |  |  |  | FGFRL1  |  |  |  |  |
|  |  |  |  |  |  |  | MAPK13  |  |  |  |  |
|  |  |  |  |  |  |  | NA      |  |  |  |  |
|  |  |  |  |  |  |  | GAS2L1  |  |  |  |  |
|  |  |  |  |  |  |  | ASF1B   |  |  |  |  |
|  |  |  |  |  |  |  | TCF21   |  |  |  |  |
|  |  |  |  |  |  |  | APBB1IP |  |  |  |  |
|  |  |  |  |  |  |  | CXCL14  |  |  |  |  |
|  |  |  |  |  |  |  | CCDC67  |  |  |  |  |
|  |  |  |  |  |  |  | HES5    |  |  |  |  |
|  |  |  |  |  |  |  | NUSAP1  |  |  |  |  |
|  |  |  |  |  |  |  | BLM     |  |  |  |  |
|  |  |  |  |  |  |  | NA      |  |  |  |  |
|  |  |  |  |  |  |  | TMEM54  |  |  |  |  |
|  |  |  |  |  |  |  | NA      |  |  |  |  |

|  |  |  |  |  |  |              |  |  |  |  |
|--|--|--|--|--|--|--------------|--|--|--|--|
|  |  |  |  |  |  | STOX1        |  |  |  |  |
|  |  |  |  |  |  | XYLT1        |  |  |  |  |
|  |  |  |  |  |  | CELSR2       |  |  |  |  |
|  |  |  |  |  |  | NA           |  |  |  |  |
|  |  |  |  |  |  | CDK1         |  |  |  |  |
|  |  |  |  |  |  | CXCR6        |  |  |  |  |
|  |  |  |  |  |  | SEMA3C       |  |  |  |  |
|  |  |  |  |  |  | NA           |  |  |  |  |
|  |  |  |  |  |  | NA           |  |  |  |  |
|  |  |  |  |  |  | ZNF124       |  |  |  |  |
|  |  |  |  |  |  | MAPK13       |  |  |  |  |
|  |  |  |  |  |  | NA           |  |  |  |  |
|  |  |  |  |  |  | TIAL1        |  |  |  |  |
|  |  |  |  |  |  | RREB1        |  |  |  |  |
|  |  |  |  |  |  | TBC1D16      |  |  |  |  |
|  |  |  |  |  |  | C12orf49     |  |  |  |  |
|  |  |  |  |  |  | APOB48R      |  |  |  |  |
|  |  |  |  |  |  | HSD11B2      |  |  |  |  |
|  |  |  |  |  |  | ERGIC1       |  |  |  |  |
|  |  |  |  |  |  | CENPA        |  |  |  |  |
|  |  |  |  |  |  | LOC100289219 |  |  |  |  |
|  |  |  |  |  |  | ERGIC1       |  |  |  |  |
|  |  |  |  |  |  | NA           |  |  |  |  |
|  |  |  |  |  |  | AQP11        |  |  |  |  |
|  |  |  |  |  |  | GRAP2        |  |  |  |  |
|  |  |  |  |  |  | NA           |  |  |  |  |
|  |  |  |  |  |  | CDC25A       |  |  |  |  |
|  |  |  |  |  |  | SMAD6        |  |  |  |  |

|  |  |  |  |  |  |  |            |  |  |  |  |
|--|--|--|--|--|--|--|------------|--|--|--|--|
|  |  |  |  |  |  |  | FAM84A     |  |  |  |  |
|  |  |  |  |  |  |  | TBC1D16    |  |  |  |  |
|  |  |  |  |  |  |  | PRLR       |  |  |  |  |
|  |  |  |  |  |  |  | BTNL8      |  |  |  |  |
|  |  |  |  |  |  |  | SEMA3C     |  |  |  |  |
|  |  |  |  |  |  |  | GALNT2     |  |  |  |  |
|  |  |  |  |  |  |  | WNT5A      |  |  |  |  |
|  |  |  |  |  |  |  | CEBPA      |  |  |  |  |
|  |  |  |  |  |  |  | NCRNA00265 |  |  |  |  |
|  |  |  |  |  |  |  | WNT5A      |  |  |  |  |
|  |  |  |  |  |  |  | NA         |  |  |  |  |
|  |  |  |  |  |  |  | ARHGEF19   |  |  |  |  |
|  |  |  |  |  |  |  | GPD1       |  |  |  |  |
|  |  |  |  |  |  |  | NA         |  |  |  |  |
|  |  |  |  |  |  |  | SOX6       |  |  |  |  |
|  |  |  |  |  |  |  | PTTG1      |  |  |  |  |
|  |  |  |  |  |  |  | ACVR1B     |  |  |  |  |
|  |  |  |  |  |  |  | SAE1       |  |  |  |  |
|  |  |  |  |  |  |  | MAEA       |  |  |  |  |
|  |  |  |  |  |  |  | PPIF       |  |  |  |  |
|  |  |  |  |  |  |  | ALDH2      |  |  |  |  |
|  |  |  |  |  |  |  | NA         |  |  |  |  |
|  |  |  |  |  |  |  | AGMAT      |  |  |  |  |
|  |  |  |  |  |  |  | FAM46C     |  |  |  |  |
|  |  |  |  |  |  |  | WNT5A      |  |  |  |  |
|  |  |  |  |  |  |  | PAPOLB     |  |  |  |  |
|  |  |  |  |  |  |  | NA         |  |  |  |  |
|  |  |  |  |  |  |  | NA         |  |  |  |  |



|  |  |  |  |  |  |  |        |  |  |  |  |
|--|--|--|--|--|--|--|--------|--|--|--|--|
|  |  |  |  |  |  |  | ASRGL1 |  |  |  |  |
|--|--|--|--|--|--|--|--------|--|--|--|--|

**Table S15:** Significant differential expression of miRNA between each RECIST response group comparison

| Group comparison         | # of significant miRNA | mirna list                                                                                                                                                                                               |
|--------------------------|------------------------|----------------------------------------------------------------------------------------------------------------------------------------------------------------------------------------------------------|
| SD (N=5) vs ARES (N=4)   | 14                     | <i>miR-9-5p</i> , miR-184, miR-1269a, <i>miR-204-5p</i> , miR-504-5p, miR-7641, miR-150-5p, miR-23b-5p, miR-27b-5p, miR342-3p, <i>miR-365a-5p</i> , <i>miR6510-3p</i> , miR-455-5p, <i>miR-934</i>       |
| SD (n=5) vs IRES (n=4)   | 14                     | <i>miR-9-5p</i> , miR-9-3p, <i>miR-204-5p</i> , miR-1269a, miR-499a-5p, miR-200b-5p, <i>miR-365a-5p</i> , miR-128-3p, <i>miR-6510-3p</i> , miR-4664-3p, miR-144-5p, miR-486-5p, <i>miR-934</i> , miR-206 |
| IRES (N=4) vs ARES (n=4) | 1                      | miR-184                                                                                                                                                                                                  |
